# Supplementary material for: Trends in sudden cardiac death and its risk factors in Japan from 1981 to 2005: the Circulatory Risk in Communities Study (CIRCS)
Source: PubMed Central journal article supplement — BMJ Open. 2012 Mar 22;2(2):e000573. doi: 10.1136/bmjopen-2011-000573 (PMC3312077; doi:10.1136/bmjopen-2011-000573), 2012-03-22
Supplement: bmjopen-2011-000573-s1.pdf [file bmjopen-2011-000573-s1.pdf]

Supplemental Table 1. The Number of Sudden Cardiac Death (SCD) according to the Time of Symptom Onset and the Place of Death.

| Place of death                       | Time of symptom onset |                       | Total    |
|--------------------------------------|-----------------------|-----------------------|----------|
|                                      | < 1 hour<br>SCD1      | 1-24 hours<br>SCD1-24 |          |
| Outside of hospital<br>SCD_NER       | 58(4)                 | 132(19)               | 190(23)  |
| Emergency room or hospital<br>SCD_ER | 105(14)               | 176(80)               | 281(94)  |
| Total                                | 163(18)               | 308(99)               | 471(117) |

In parentheses, the number of SCD with myocardial infarction (SCD\_MI)

Supplemental Table 2. Trends for age- and sex-adjusted cardiovascular risk characteristics among men and women aged 40 to 74 years in four Japanese communities from 1981 to 2005.

|                                               | 1981-1985 | 1986-1990 | 1991-1995 | 1996-2000 | 2001-2005 | <i>p</i> for trend |
|-----------------------------------------------|-----------|-----------|-----------|-----------|-----------|--------------------|
| Age-adjusted, mean or percent                 |           |           |           |           |           |                    |
| Men                                           |           |           |           |           |           |                    |
| Number                                        | 4678      | 4315      | 4408      | 4281      | 4038      |                    |
| Age, year                                     | 55        | 56        | 57        | 59        | 60        |                    |
| Systolic blood pressure, mmHg                 | 137       | 134       | 133       | 135       | 133       | <0.01              |
| Diastolic blood pressure, mmHg                | 82        | 82        | 81        | 83        | 83        | <0.01              |
| Antihypertensive medication, %                | 19.7      | 18.6      | 17.1      | 18.0      | 19.2      | 0.322              |
| Hypertension, %                               | 50.2      | 41.6      | 41.6      | 45.3      | 45.1      | <0.01              |
| Body mass index, kg/m <sup>2</sup>            | 22.8      | 23.0      | 23.3      | 23.6      | 24.0      | <0.01              |
| Overweight (BMI ≥25kg/m <sup>2</sup> )        | 26.5      | 29.4      | 30.3      | 34.1      | 35.8      | <0.01              |
| Total cholesterol, mmol/L                     | 4.76      | 4.90      | 4.99      | 5.15      | 5.27      | <0.01              |
| Total cholesterol ≥5.69 mmol/L, %             | 14.1      | 17.9      | 21.2      | 27.5      | 32.7      | <0.01              |
| Blood glucose, mmol/L                         | 61.9      | 69.6      | 68.0      | 63.8      | 62.3      | <0.01              |
| Diabetes mellitus, %                          | 4.8       | 7.1       | 7.3       | 7.7       | 9.8       | <0.01              |
| Heavy drinking(ethanol intake ≥46g/day)       | 33.5      | 30.2      | 29.6      | 29.6      | 25.1      | <0.01              |
| Current smoking, %                            | 61.0      | 56.3      | 52.4      | 49.9      | 44.6      | <0.01              |
| ECG findings                                  |           |           |           |           |           |                    |
| Atrial fibrillation                           | 1.3       | 1.5       | 1.1       | 1.3       | 1.3       | 0.639              |
| Ventricular premature contraction             | 3.0       | 2.8       | 2.9       | 2.5       | 2.1       | 0.013              |
| Supraventricular premature contraction        | 2.8       | 3.7       | 3.6       | 3.0       | 2.8       | 0.535              |
| Major ST-T abnormality                        | 4.5       | 4.0       | 3.7       | 4.0       | 3.9       | <0.01              |
| Minor ST-T abnormality                        | 12.5      | 9.9       | 12.5      | 11.8      | 11.6      | <0.01              |
| PQ prolonged                                  | 1.4       | 1.1       | 1.3       | 1.4       | 1.0       | 0.465              |
| Complete/incomplete right bundle branch block | 5.3       | 5.0       | 5.1       | 5.6       | 6.1       | 0.449              |
| Wide QRS                                      | 2.9       | 2.8       | 2.8       | 3.2       | 3.5       | 0.075              |
| Abnormal Q wave                               | 0.4       | 0.6       | 0.5       | 0.6       | 0.7       | 0.307              |
| Left ventricular hypertrophy                  | 29.3      | 27.6      | 23.3      | 19.5      | 17.5      | <0.01              |
| Women                                         |           |           |           |           |           |                    |
| Number                                        | 6954      | 6766      | 7131      | 7041      | 6524      |                    |
| Age, year                                     | 55        | 56        | 56        | 57        | 58        |                    |
| Systolic blood pressure, mmHg                 | 135       | 132       | 130       | 131       | 129       | <0.01              |
| Diastolic blood pressure, mmHg                | 79        | 78        | 78        | 79        | 78        | <0.01              |
| Antihypertensive medication, %                | 19.3      | 18.4      | 16.5      | 16.6      | 17.4      | <0.01              |
| Hypertension, %                               | 43.4      | 38.1      | 34.7      | 35.8      | 34.1      | <0.01              |
| Body mass index, kg/m <sup>2</sup>            | 23.6      | 23.5      | 23.5      | 23.5      | 23.3      | <0.01              |
| Overweight (BMI ≥25kg/m <sup>2</sup> )        | 35.8      | 35.0      | 32.6      | 32.8      | 29.2      | <0.01              |
| Total cholesterol, mg/dl                      | 5.12      | 5.28      | 5.33      | 5.53      | 5.59      | <0.01              |
| Total cholesterol ≥5.69 mmol/L, %             | 25.5      | 30.7      | 33.3      | 43.1      | 48.7      | <0.01              |
| Blood glucose, mmol/L                         | 58.2      | 65.7      | 63.2      | 57.6      | 56.6      | <0.01              |
| Diabetes mellitus, %                          | 2.8       | 3.9       | 3.5       | 3.9       | 4.1       | <0.01              |
| Heavy drinking(ethanol intake ≥46g/day)       | 0.5       | 0.4       | 0.5       | 0.6       | 0.5       | 0.041              |
| Current smoking, %                            | 6.4       | 5.7       | 5.6       | 6.0       | 6.1       | 0.659              |
| ECG findings                                  |           |           |           |           |           |                    |
| Atrial fibrillation                           | 0.6       | 0.5       | 0.3       | 0.3       | 0.3       | <0.01              |
| Ventricular premature contraction             | 2.0       | 2.2       | 1.7       | 1.8       | 1.9       | 0.269              |
| Supraventricular premature contraction        | 2.3       | 2.5       | 2.9       | 2.4       | 2.5       | 0.653              |
| Major ST-T abnormality                        | 6.5       | 5.8       | 4.9       | 4.4       | 4.6       | 0.970              |
| Minor ST-T abnormality                        | 22.5      | 19.0      | 19.9      | 20.0      | 17.4      | 0.283              |
| PQ prolonged                                  | 0.5       | 0.5       | 0.4       | 0.5       | 0.4       | 0.063              |
| Complete/incomplete right bundle branch block | 3.1       | 3.4       | 3.1       | 3.2       | 3.0       | <0.01              |
| Wide QRS                                      | 1.4       | 1.6       | 1.5       | 1.6       | 1.5       | 0.598              |
| Abnormal Q wave                               | 0.1       | 0.2       | 0.2       | 0.2       | 0.3       | 0.010              |
| Left ventricular hypertrophy                  | 10.8      | 9.6       | 7.7       | 5.7       | 4.5       | <0.01              |

Supplemental Table 3. Trends for age- and sex-adjusted cardiovascular risk characteristics among men and women aged 40 to 74 years in Ikawa and Kyowa with high participation rates from 1981 to 2005.

|                                               | 1981-1985 | 1986-1990 | 1991-1995 | 1996-2000 | 2001-2005 | <i>p</i> for trend |
|-----------------------------------------------|-----------|-----------|-----------|-----------|-----------|--------------------|
| Age-adjusted, mean or percent                 |           |           |           |           |           |                    |
| Men                                           |           |           |           |           |           |                    |
| Number                                        | 2698      | 2384      | 2533      | 2506      | 2381      |                    |
| Age, year                                     | 55        | 55        | 57        | 59        | 59        |                    |
| Systolic blood pressure, mmHg                 | 139       | 136       | 134       | 135       | 133       | <0.01              |
| Diastolic blood pressure, mmHg                | 82        | 83        | 81        | 82        | 82        | 0.913              |
| Antihypertensive medication, %                | 21.7      | 21.7      | 19.3      | 20.6      | 21.6      | 0.425              |
| Hypertension, %                               | 55.0      | 50.3      | 44.1      | 47.4      | 46.7      | <0.01              |
| Body mass index, kg/m <sup>2</sup>            | 22.9      | 23.2      | 23.4      | 23.7      | 23.9      | <0.01              |
| Overweight (BMI ≥25kg/m <sup>2</sup> )        | 27.3      | 32.1      | 29.0      | 32.7      | 36.0      | <0.01              |
| Total cholesterol, mmol/L                     | 4.69      | 4.82      | 4.92      | 5.07      | 5.21      | <0.01              |
| Total cholesterol ≥5.69 mmol/L, %             | 13.4      | 15.5      | 18.5      | 24.0      | 30.5      | <0.01              |
| Blood glucose, mmol/L                         | 59.0      | 72.7      | 70.3      | 64.1      | 61.3      | <0.01              |
| Diabetes mellitus, %                          | 4.2       | 9.1       | 8.1       | 8.1       | 10.3      | <0.01              |
| Heavy drinking(ethanol intake ≥46g/day)       | 39.0      | 37.3      | 34.3      | 34.7      | 27.7      | <0.01              |
| Current smoking, %                            | 65.1      | 61.0      | 56.1      | 53.2      | 47.2      | <0.01              |
| ECG findings, %                               |           |           |           |           |           |                    |
| Atrial fibrillation                           | 1.5       | 1.9       | 1.4       | 1.7       | 1.4       | 0.588              |
| Ventricular premature contraction             | 3.4       | 2.9       | 3.6       | 2.6       | 2.2       | 0.011              |
| Supraventricular premature contraction        | 3.2       | 3.4       | 3.5       | 3.2       | 3.1       | 0.520              |
| Major ST-T abnormality                        | 5.0       | 4.7       | 3.5       | 4.0       | 3.4       | <0.01              |
| Minor ST-T abnormality                        | 11.2      | 9.3       | 11.3      | 10.8      | 9.9       | 0.507              |
| PQ prolonged                                  | 1.4       | 1.1       | 0.9       | 1.2       | 1.0       | 0.375              |
| Complete/incomplete right bundle branch block | 5.1       | 4.9       | 4.8       | 4.8       | 5.6       | 0.628              |
| Wide QRS                                      | 2.9       | 2.6       | 2.8       | 2.8       | 3.1       | 0.634              |
| Abnormal Q wave                               | 0.6       | 0.7       | 0.5       | 0.7       | 0.7       | 0.869              |
| Left ventricular hypertrophy                  | 31.1      | 29.8      | 29.1      | 21.6      | 21.5      | <0.01              |
| Women                                         |           |           |           |           |           |                    |
| Number                                        | 3543      | 3299      | 3618      | 3686      | 3473      |                    |
| Age, year                                     | 55        | 56        | 57        | 57        | 58        |                    |
| Systolic blood pressure, mmHg                 | 136       | 134       | 131       | 132       | 130       | <0.01              |
| Diastolic blood pressure, mmHg                | 80        | 80        | 78        | 78        | 78        | <0.01              |
| Antihypertensive medication, %                | 22.2      | 21.7      | 19.2      | 20.1      | 19.7      | <0.01              |
| Hypertension, %                               | 47.3      | 42.6      | 36.9      | 37.8      | 35.7      | <0.01              |
| Body mass index, kg/m <sup>2</sup>            | 24.0      | 24.1      | 23.9      | 23.9      | 23.8      | <0.01              |
| Overweight (BMI ≥25kg/m <sup>2</sup> )        | 41.3      | 41.7      | 36.4      | 36.4      | 33.6      | <0.01              |
| Total cholesterol, mmol/L                     | 5.06      | 5.23      | 5.26      | 5.42      | 5.51      | <0.01              |
| Total cholesterol ≥5.69 mmol/L, %             | 23.3      | 28.8      | 30.8      | 38.9      | 45.7      | <0.01              |
| Blood glucose, mmol/L                         | 54.8      | 67.7      | 65.3      | 58.3      | 56.4      | <0.01              |
| Diabetes mellitus, %                          | 2.7       | 5.4       | 4.2       | 4.5       | 4.6       | 0.204              |
| Heavy drinking(ethanol intake ≥46g/day)       | 0.4       | 0.3       | 0.5       | 0.7       | 0.5       | 0.140              |
| Current smoking, %                            | 5.3       | 4.2       | 4.3       | 4.7       | 4.8       | 0.600              |
| ECG findings, %                               |           |           |           |           |           |                    |
| Atrial fibrillation                           | 0.6       | 0.7       | 0.4       | 0.5       | 0.4       | 0.133              |
| Ventricular premature contraction             | 2.4       | 2.7       | 1.8       | 2.0       | 2.2       | 0.119              |
| Supraventricular premature contraction        | 2.7       | 2.7       | 2.7       | 2.5       | 3.1       | 0.653              |
| Major ST-T abnormality                        | 7.5       | 6.2       | 4.2       | 4.5       | 3.6       | <0.01              |
| Minor ST-T abnormality                        | 20.8      | 18.2      | 18.2      | 17.9      | 12.9      | <0.01              |
| PQ prolonged                                  | 0.4       | 0.4       | 0.4       | 0.6       | 0.5       | 0.120              |
| Complete/incomplete right bundle branch block | 2.4       | 3.1       | 2.9       | 3.3       | 3.3       | 0.049              |
| Wide QRS                                      | 1.1       | 1.5       | 1.3       | 1.5       | 1.6       | 0.107              |
| Abnormal Q wave                               | 0.1       | 0.2       | 0.1       | 0.1       | 0.3       | 0.254              |
| Left ventricular hypertrophy                  | 11.5      | 10.9      | 10.1      | 7.4       | 5.7       | <0.01              |

Supplemental Table 4. Trends for age- and sex-adjusted cardiovascular risk characteristics among men and women aged 40 to 74 years in Yao and Noichi with lower participation rates from 1981 to 2005.

|                                               | 1981-1985 | 1986-1990 | 1991-1995 | 1996-2000 | 2001-2005 | <i>p</i> for trend |
|-----------------------------------------------|-----------|-----------|-----------|-----------|-----------|--------------------|
| Age-adjusted, mean or percent                 |           |           |           |           |           |                    |
| Men                                           |           |           |           |           |           |                    |
| Number                                        | 1980      | 1931      | 1875      | 1775      | 1657      |                    |
| Age, year                                     | 56        | 57        | 58        | 60        | 61        |                    |
| Systolic blood pressure, mmHg                 | 135       | 132       | 132       | 134       | 133       | 0.401              |
| Diastolic blood pressure, mmHg                | 81        | 80        | 82        | 83        | 83        | <0.01              |
| Antihypertensive medication, %                | 17.0      | 14.9      | 14.1      | 14.2      | 15.8      | 0.251              |
| Hypertension, %                               | 43.7      | 37.5      | 38.3      | 42.2      | 42.6      | 0.598              |
| Body mass index, kg/m <sup>2</sup>            | 22.6      | 22.8      | 23.2      | 23.5      | 24.0      | <0.01              |
| Overweight (BMI ≥25kg/m <sup>2</sup> )        | 25.3      | 26.1      | 32.0      | 36.2      | 35.6      | <0.01              |
| Total cholesterol, mmol/L                     | 4.88      | 5.00      | 5.09      | 5.27      | 5.36      | <0.01              |
| Total cholesterol ≥5.69 mmol/L, %             | 15.3      | 20.9      | 24.7      | 32.6      | 35.9      | <0.01              |
| Blood glucose, mmol/L                         | 67.3      | 67.0      | 65.3      | 62.2      | 62.0      | <0.01              |
| Diabetes mellitus, %                          | 5.4       | 4.9       | 6.3       | 7.0       | 9.0       | <0.01              |
| Heavy drinking(ethanol intake ≥46g/day)       | 26.7      | 21.6      | 23.1      | 22.2      | 21.1      | <0.01              |
| Current smoking, %                            | 55.8      | 50.5      | 47.5      | 45.1      | 40.8      | <0.01              |
| ECG findings, %                               |           |           |           |           |           |                    |
| Atrial fibrillation                           | 1.1       | 1.0       | 0.8       | 0.8       | 1.1       | 0.767              |
| Ventricular premature contraction             | 2.5       | 2.7       | 2.0       | 2.4       | 2.1       | 0.362              |
| Supraventricular premature contraction        | 2.1       | 4.1       | 3.8       | 2.7       | 2.5       | 0.781              |
| Major ST-T abnormality                        | 3.7       | 3.1       | 3.9       | 4.1       | 4.7       | 0.037              |
| Minor ST-T abnormality                        | 14.3      | 10.7      | 14.2      | 13.2      | 14.1      | 0.396              |
| PQ prolonged                                  | 1.5       | 1.1       | 1.8       | 1.5       | 0.9       | 0.567              |
| Complete/incomplete right bundle branch block | 5.5       | 5.2       | 5.4       | 6.6       | 6.8       | 0.023              |
| Wide QRS                                      | 3.0       | 3.1       | 2.8       | 3.8       | 4.1       | 0.035              |
| Abnormal Q wave                               | 0.2       | 0.6       | 0.5       | 0.5       | 0.5       | 0.159              |
| Left ventricular hypertrophy                  | 27.0      | 25.0      | 15.4      | 16.4      | 11.5      | <0.01              |
| Women                                         |           |           |           |           |           |                    |
| Number                                        | 3411      | 3467      | 3513      | 3355      | 3051      |                    |
| Age, year                                     | 55        | 55        | 56        | 58        | 59        |                    |
| Systolic blood pressure, mmHg                 | 133       | 131       | 130       | 130       | 129       | <0.01              |
| Diastolic blood pressure, mmHg                | 79        | 77        | 79        | 80        | 79        | 0.025              |
| Antihypertensive medication, %                | 16.4      | 15.3      | 13.5      | 12.8      | 14.8      | 0.014              |
| Hypertension, %                               | 39.3      | 33.7      | 32.4      | 33.6      | 32.4      | <0.01              |
| Body mass index, kg/m <sup>2</sup>            | 23.1      | 23.0      | 23.0      | 23.0      | 22.8      | <0.01              |
| Overweight (BMI ≥25kg/m <sup>2</sup> )        | 30.3      | 28.6      | 28.7      | 29.0      | 24.2      | <0.01              |
| Total cholesterol, mmol/L                     | 5.20      | 5.33      | 5.40      | 5.64      | 5.67      | <0.01              |
| Total cholesterol ≥5.69 mmol/L, %             | 28.4      | 32.5      | 35.9      | 47.7      | 52.0      | <0.01              |
| Blood glucose, mmol/L                         | 61.6      | 63.9      | 61.3      | 56.8      | 56.9      | <0.01              |
| Diabetes mellitus, %                          | 2.8       | 2.6       | 2.8       | 3.4       | 3.5       | 0.020              |
| Heavy drinking(ethanol intake ≥46g/day)       | 0.5       | 0.3       | 0.5       | 0.5       | 0.7       | 0.151              |
| Current smoking, %                            | 7.5       | 7.1       | 6.9       | 7.4       | 7.5       | 0.774              |
| ECG findings, %                               |           |           |           |           |           |                    |
| Atrial fibrillation                           | 0.6       | 0.3       | 0.2       | 0.1       | 0.2       | <0.01              |
| Ventricular premature contraction             | 1.5       | 1.8       | 1.7       | 1.6       | 1.6       | 0.974              |
| Supraventricular premature contraction        | 2.0       | 2.3       | 3.1       | 2.2       | 2.0       | 0.900              |
| Major ST-T abnormality                        | 5.4       | 5.4       | 5.6       | 4.3       | 5.6       | 0.613              |
| Minor ST-T abnormality                        | 24.2      | 19.8      | 21.6      | 22.3      | 22.5      | 0.721              |
| PQ prolonged                                  | 0.6       | 0.6       | 0.4       | 0.3       | 0.3       | 0.008              |
| Complete/incomplete right bundle branch block | 3.9       | 3.6       | 3.3       | 3.0       | 2.6       | 0.005              |
| Wide QRS                                      | 1.7       | 1.6       | 1.8       | 1.6       | 1.4       | 0.505              |
| Abnormal Q wave                               | 0.1       | 0.2       | 0.3       | 0.2       | 0.4       | 0.015              |
| Left ventricular hypertrophy                  | 10.1      | 8.4       | 5.1       | 4.0       | 3.1       | <0.01              |
