# Supplementary material for: Trends in sudden cardiac death and its risk factors in Japan from 1981 to 2005: the Circulatory Risk in Communities Study (CIRCS)
Source: PubMed Central journal article supplement — BMJ Open. 2012 Mar 22;2(2):e000573. doi: 10.1136/bmjopen-2011-000573 (PMC3312077; doi:10.1136/bmjopen-2011-000573), 2012-03-22
Supplement: bmjopen-2011-000573.draft_revisions.pdf [file bmjopen-2011-000573.draft_revisions.pdf]

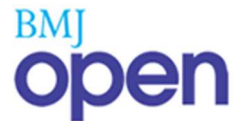

**Trends in Sudden Cardiac Death and Its Risk Factors in Japan from 1981 to 2005: time-trend analysis from the Circulatory Risk in Communities Study (CIRCS)**

|                                 |                                                                                                                                                                                                                                                                                                                                                                                                                                                                                                                                                                                                                                                                                                                                                                                                                                                                                                                                                                                                                                                                                                                                                 |
|---------------------------------|-------------------------------------------------------------------------------------------------------------------------------------------------------------------------------------------------------------------------------------------------------------------------------------------------------------------------------------------------------------------------------------------------------------------------------------------------------------------------------------------------------------------------------------------------------------------------------------------------------------------------------------------------------------------------------------------------------------------------------------------------------------------------------------------------------------------------------------------------------------------------------------------------------------------------------------------------------------------------------------------------------------------------------------------------------------------------------------------------------------------------------------------------|
| Journal:                        | <i>BMJ Open</i>                                                                                                                                                                                                                                                                                                                                                                                                                                                                                                                                                                                                                                                                                                                                                                                                                                                                                                                                                                                                                                                                                                                                 |
| Manuscript ID:                  | bmjopen-2011-000573                                                                                                                                                                                                                                                                                                                                                                                                                                                                                                                                                                                                                                                                                                                                                                                                                                                                                                                                                                                                                                                                                                                             |
| Article Type:                   | Research                                                                                                                                                                                                                                                                                                                                                                                                                                                                                                                                                                                                                                                                                                                                                                                                                                                                                                                                                                                                                                                                                                                                        |
| Date Submitted by the Author:   | 06-Nov-2011                                                                                                                                                                                                                                                                                                                                                                                                                                                                                                                                                                                                                                                                                                                                                                                                                                                                                                                                                                                                                                                                                                                                     |
| Complete List of Authors:       | Maruyama, Minako; Osaka University Graduate School of Medicine, Public Health, Department of Social and Environmental Medicine<br>Ohira, Tetsuya; Osaka University Graduate School of Medicine, Public Health, Department of Social and Environmental Medicine<br>Imano, Hironori; Osaka University Graduate School of Medicine, Public Health, Department of Social and Environmental Medicine<br>Kitamura, Akihiko; Osaka Medical Center for Health Science and Promotion<br>Kiyama, Masahiko; Osaka Medical Center for Health Science and Promotion<br>Okada, Takeo; Osaka Medical Center for Health Science and Promotion<br>Maeda, Kenji; Osaka Medical Center for Health Science and Promotion<br>Yamagishi, Kazumasa; Department of Public Health Medicine, University of Tsukuba<br>Noda, Hiroyuki; Medical Center for Translational Research<br>Ishikawa, Yoshinori; Osaka Medical Center for Health Science and Promotion<br>Shimamoto, Takashi; Osaka Medical Center for Health Science and Promotion<br>Iso, Hiroyasu; Osaka University Graduate School of Medicine, Public Health, Department of Social and Environmental Medicine |
| <b>Primary Subject Heading</b>: | Epidemiology                                                                                                                                                                                                                                                                                                                                                                                                                                                                                                                                                                                                                                                                                                                                                                                                                                                                                                                                                                                                                                                                                                                                    |
| Secondary Subject Heading:      | Public health                                                                                                                                                                                                                                                                                                                                                                                                                                                                                                                                                                                                                                                                                                                                                                                                                                                                                                                                                                                                                                                                                                                                   |
| Keywords:                       | Hypertension < CARDIOLOGY, Coronary heart disease < CARDIOLOGY, EPIDEMIOLOGY                                                                                                                                                                                                                                                                                                                                                                                                                                                                                                                                                                                                                                                                                                                                                                                                                                                                                                                                                                                                                                                                    |
|                                 |                                                                                                                                                                                                                                                                                                                                                                                                                                                                                                                                                                                                                                                                                                                                                                                                                                                                                                                                                                                                                                                                                                                                                 |

SCHOLARONE™  
Manuscripts

1  
2  
3 Trends in Sudden Cardiac Death and Its Risk Factors in Japan from 1981 to 2005: time-trend analysis  
4  
5 from the Circulatory Risk in Communities Study (CIRCS)  
6

7  
8 Minako Maruyama, MSc<sup>1,2</sup>, Tetsuya Ohira, MD<sup>1,2</sup>, Hironori Imano, MD<sup>1,2</sup>, Akihiko Kitamura, MD<sup>2</sup>,  
9  
10 Masahiko Kiyama, MD<sup>2</sup>, Takeo Okada, MD<sup>2</sup>, Kenji Maeda, MD<sup>2</sup>, Kazumasa Yamagishi, MD<sup>2,3</sup>,  
11  
12 Hiroyuki Noda, MD<sup>2,4</sup>, Yoshinori Ishikawa, MD<sup>2</sup>, Takashi Shimamoto, MD<sup>2</sup>, Hiroyasu Iso, MD<sup>1\*</sup>.  
13

14  
15  
16  
17 <sup>1</sup>Department of Social and Environmental Medicine, Osaka University, Suita, JAPAN

18  
19 <sup>2</sup>Osaka Medical Center for Health Science and Promotion, Osaka, JAPAN

20  
21 <sup>3</sup>Department of Public Health Medicine, University of Tsukuba, Tsukuba, JAPAN

22  
23 <sup>4</sup>Medical Center for Translational Research, Osaka University Hospital, Suita, JAPAN  
24

25  
26  
27  
28 \*Corresponding author. Hiroyasu Iso, MD, PhD, MPH, Professor of Public Health, Department of  
29  
30 Social and Environmental Medicine, Osaka University Graduate School of Medicine, 2-2 Yamadaoka,  
31  
32 Suita, Osaka 565-0871 JAPAN.  
33

34  
35 Phone: +81-6-6879-3911, Fax: +81-6-6879-3919, E-mail:iso@pbhel.med.osaka-u.ac.jp  
36  
37

38  
39 **Key words:** sudden cardiac death, incidence, general population, Japanese  
40

41  
42  
43 **Word counts:**3,160words  
44  
45  
46  
47  
48  
49  
50  
51  
52  
53  
54  
55  
56  
57  
58  
59  
60

## Article summary

### Article focus

- The incidence rate of coronary heart disease among urban middle-aged Japanese men has increased from 1990s to 2000s, therefore the incidence of SCD for Japanese individuals may have increased in recent decades.
- This is the first study to examine recent trends in sudden cardiac death (SCD) in Japan

### Key messages

- Age- and sex-adjusted incidence of SCD for four general Japanese populations decreased from 1981-1985 to 1991-1995, and plateaued after 1996, corresponding to the trend for the prevalence of hypertension.
- We suggest that continuous surveillance will be needed to clarify future trends for the incidence of SCD and its risk factors in Japan.

### The strength and limitation

- We analyzed trends for SCD using population-based data from a large number of participants in a long-term observational study and conducted annual cardiovascular risk factor surveys ascertained the trends for predisposing risk factors of SCD.
- We only examined the incidence of SCD for the age range of 30-84 years old.
- Clinical features and neuroimaging reports were used to exclude death due to stroke, some cases may have been misclassified, especially in the case of an out-of-hospital death.

**Abstract**

**Objective** - There is little evidence whether sudden cardiac death (SCD) increases in Asia, although the incidence of coronary heart disease among urban middle-aged Japanese men has increased recently.

Then, we examined trends for the incidence of SCD and its risk factors in the Circulatory Risk in Communities Study (CIRCS).

**Design and Setting** - Population-based longitudinal study. Surveillance of men and women for the SCD incidence and risk factors was conducted from 1981 to 2005.

**Subjects** - The surveyed population was all residents of men and women aged 30 to 84 years in three rural and an urban communities in Japan.

**Main outcome measures** - Trends in SCD incidence and its risk factors.

**Results** - Age- and sex-adjusted incidence of SCD decreased from 1981-1985 to 1991-1995, and plateaued thereafter; the annual incidence per 100,000 person in the 5 time periods was 64.6, 57.8, 33.4, 30.2, and 35.6, respectively. Age- and sex-adjusted prevalence of hypertension decreased from 1981-1985 to 1991-1995, and plateaued thereafter, which corresponded to the SCD trend. The mean levels of body mass index for men and of total cholesterol and the prevalence of diabetes mellitus increased for both sexes from 1981 to 2005.

**Conclusions** - The incidence of SCD decreased from 1981 to 1995 but unchanged from 1995 to 2005, corresponding to the hypertension trend. Continuous surveillance is necessary to clarify future trends for SCD in Japan, because of increasing trends for other cardiovascular risk factors such as overweight for men and high total cholesterol and diabetes mellitus for both sexes.

1  
2  
3 In the United States, estimates of the annual number of sudden cardiac death (SCD) range from  
4  
5 184,000 to 400,000, accounting for almost half of all coronary heart disease (CHD) deaths [1-4]. The  
6  
7 incidence of SCD was 50% higher in men than women, and the age-adjusted annual incidence of SCD  
8  
9 per 100,000 person was 410.6 for men and 274.6 for women in 1998 among US residents aged  $\geq 35$   
10  
11 years [ 3]. Several population-based studies have reported on the incidence of SCD among Japanese  
12  
13 [5-8], however these studies are questionable due to methodological problems, such as small sample  
14  
15 size [7], a working population [8], and an inaccurate definition of SCD based on death certificate data  
16  
17 only [6]. Baba et al. reported from a sample from Suita City (census population: approximately  
18  
19 340,000) that in persons aged 20-74, the incidence of SCD was 31 (men = 45, women = 20) per  
20  
21 100,000 people. Information on SCD was determined using police records [5]. This suggests that the  
22  
23 incidence of SCD in Japan is about one-fifth of that in the United States [1,3,9].  
24  
25  
26

27  
28 SCD is generally considered to be caused by CHD. The CHD mortality rate in Japan has been  
29  
30 observed to be one-third to one-fifth of that in the United States [6,9,10]: this difference might explain  
31  
32 the difference in the incidence of SCD between Japan and the United States. However, Kitamura et al.  
33  
34 reported a significant increase in the incidence of CHD among middle-aged urban Japanese men from  
35  
36 1980-87 to 1996-2003 [11]. Therefore we expected that the incidence of SCD for Japanese individuals  
37  
38 may have increased in recent decades. So far, no epidemiological study has been reported which has  
39  
40 investigated trends in the incidence of SCD in a large population-based study.  
41  
42

43 Therefore the purpose of this study was to examine trends in the incidence of SCD and its risk  
44  
45 factors in the Circulatory Risk in Communities Study (CIRCS), a longitudinal community-based study  
46  
47 of men and women.  
48  
49  
50  
51  
52  
53  
54  
55  
56  
57  
58  
59  
60

## Methods

The CIRCS is a population-based study of cardiovascular risk factors, disease incidence, and their respective trends in Japanese communities. Details of the study design and procedures of CIRCS have been reported elsewhere [11-14]. Briefly, the subjects were Japanese men and women who lived in a north-eastern rural community, Ikawa (1995 census population = 6,206), a south-western rural community, Noichi (1995 census population = 15,828), a central rural community, Kyowa (1995 census population = 17,322), and a south-western urban suburb, the Minami-Takayasu district of Yao (1995 census population = 23,654). All analyses were limited to men and women aged 30 to 84 years because the number of SCD cases aged <30 years was too small (<1%), and for many cases aged ≥85 years their causes of death were difficult to be identified. Annual cardiovascular risk surveys have been conducted since 1963 in the district of Yao City and Ikawa, since 1969 in Noichi and since 1981 in Kyowa by a joint research team from the Osaka Medical Center for Health Science and Promotion, the University of Tsukuba, and Osaka University. The total survey populations in Ikawa were 3,997 in 1985, 4,167 in 1995, and 4,172 in 2000, while the corresponding totals were: 13,655, 14,885, and 15,923 in Yao; 8,149, 9,600, and 10,592 in Noichi; and 9,614, 10,801, and 10,948 in Kyowa.

Informed consent was obtained from community representatives to conducting an epidemiological study based on guidelines established by the Council for International Organizations of Medical Science [15]. This study was approved by the Ethics Committee of the Osaka Medical Center for Health Science and Promotion.

We included in our study all SCD events that occurred between January 1, 1981 and December 31, 2005. The morbidity surveillance collected disease data on men and women aged 30-84 in the four communities and used six sources to examine candidate cases: national insurance claims, reports by local physicians, ambulance records, death certificates, reports by public health nurses and health volunteers, and cardiovascular risk surveys (Figure 1) [11-14]. For confirmation of the diagnoses, we also obtained histories from next of kin and reviewed medical records in local hospitals.

1  
2  
3 The criteria for CHD were modified from those of the World Health Organization Expert  
4 Committee [16]. The indication for definite myocardial infarction (MI) was typical, severe chest pain  
5 (lasting at least 30 minutes and without definite non-ischemic cause) accompanied by new, abnormal,  
6 and persistent Q or QS waves, consistent changes in cardiac enzyme levels, or both. If the  
7 electrocardiographic and enzyme levels were non-diagnostic or unavailable, but the patient suffered  
8 typical chest pain, a diagnosis of possible MI was made. For our study, definite and possible infarctions  
9 were combined into a single category, MI. These criteria are essentially the same as those of the  
10 WHO-MONICA project [17]. Angina pectoris was defined as repeated episodes of chest pain during  
11 effort, usually disappearing rapidly after the cessation of effort or upon use of sublingual nitroglycerin  
12 [12,13]. In the present study, CHD included definite or probable MI and angina pectoris.

13  
14  
15  
16  
17  
18  
19  
20  
21  
22  
23  
24  
25  
26  
27  
28  
29  
30  
31  
32  
33  
34  
35  
36  
37  
38  
39  
40  
41  
42  
43  
44  
45  
46  
47  
48  
49  
50  
51  
52  
53  
54  
55  
56  
57  
58  
59  
60  
SCD was defined as sudden unexpected death either within 1 hour of symptom onset or within  
24 hours of having been observed alive and symptom-free. We excluded candidate cases if they  
survived for over 24 hours after symptom onset, or if there was another apparent cause of death, such  
as stroke, cancer, or accident. The final diagnosis of SCD was made by a panel of three or four trained  
physician-epidemiologists, blinded to the data of cardiovascular risk factors. We further classified the  
SCD cases into two groups according to the presence or absence of MI [18]. If the SCD case was  
accompanied with MI, it grouped SCD with MI (SCD\_MI), and others were grouped as SCD without  
MI (SCD\_NMI). In addition, SCD cases were divided into two groups stratified by time of symptom  
onset. If the time of symptom onset was within 1 hour, they were categorized as SCD1, and if it  
occurred within 24 hours but they were not SCD1, they were categorized as SCD1-24. Finally, SCD  
cases were divided into two groups based on place of death [3]. If the place of death was in emergency  
room (ER) or a hospital, the case was categorized as SCD\_ER, and if it was outside of a hospital, it was  
categorized as SCD\_NER (Table 1).

Age- and sex-adjusted annual incidence of SCD was calculated from the number of new cases  
per 100,000 person during the five survey periods, 1981 to 1985, 1986 to 1990, 1991 to 1995, 1996 to

1  
2  
3 2000, and 2001 to 2005, in the aforementioned four Japanese communities.  
4

5 Cardiovascular risk factors were ascertained for the population sample during each of the five  
6 survey periods. The participants in the risk factors surveys were recruited from all residents aged 30-84  
7 in the four communities. The surveys were conducted for the purpose of promoting primary prevention  
8 of cardiovascular disease and stroke.  
9

10 The items examined for the risk factor surveys included: medical history, measurement of total  
11 cholesterol, blood pressure, body mass index (BMI), blood glucose, electrocardiogram (ECG) findings,  
12 and drinking and smoking habits [11]. Hypertension was defined as a systolic blood pressure (BP)  $\geq$   
13 140 mmHg, or a diastolic BP  $\geq$  90 mmHg, or use of an anti-hypertensive medication. Diabetes mellitus  
14 was defined as a fasting glucose level  $\geq$  7.00 mmol/l, a nonfasting glucose level  $\geq$  11.10mmol/l, or use  
15 of an antidiabetic medication. Overweight was defined as a BMI  $\geq$  25 kg/m<sup>2</sup>. The ECG data were  
16 obtained with the subject in the supine position and were coded with the Minnesota Code, second  
17 version [19], by trained physician-epidemiologists.  
18  
19  
20  
21  
22  
23  
24  
25  
26  
27  
28  
29  
30  
31

32 To calculate age- and sex-adjusted incidence, we employed the direct standardization method  
33 using the age and sex distributions of the Japanese national model population from 1985. Linear trends  
34 in incidence were examined with the chi-square test. Sex-specific age-adjusted means of risk factors  
35 were estimated by analysis of covariance, and age-adjusted prevalence by the direct method of  
36 standardization.  
37  
38  
39  
40  
41  
42

43 The significance of risk factor trends was examined for continuous variables by using the  
44 regression analysis for repeated measures [11], with the five periods represented as 1982.5, 1987.5,  
45 1992.5, 1997.5 and 2002.5, and for discrete variables by using the chi-square test for trends. All  
46 statistical analyses were performed with the SAS System for Windows (Version 9.1, SAS Institute,  
47 Cary, NC).  
48  
49  
50  
51  
52  
53  
54  
55

## 56 Results 57 58 59 60



1  
2  
3  
4  
5  
6  
7  
8  
9  
10  
11  
12  
13  
14  
15  
16  
17  
18  
19  
20  
21  
22  
23  
24  
25  
26  
27  
28  
29  
30  
31  
32  
33  
34  
35  
36  
37  
38  
39  
40  
41  
42  
43  
44  
45  
46  
47  
48  
49  
50  
51  
52  
53  
54  
55  
56  
57  
58  
59  
60

In the present study, 471 individuals with SCD were identified over 25 years, consisting of 117 SCD\_MI and 354 SCD\_NMI, 163 SCD1 and 308 SCD1-24, 190 SCD\_NER, and 281 SCD\_ER. The number of SCD (in parenthesis, SCD\_MI) was presented according to the time of symptom onset and the place of death (Supplementary material).

As shown in Table 1, age- and sex-adjusted incidence of SCD decreased from 1981-1985 to 1991-1995, however plateaued after 1996 ( $p$  for trend was  $p < 0.01$  from 1981-1985 to 1991-1995, and  $p = 0.69$  from 1991-1995 to 2001-2005). The annual incidence of SCD per 100,000 person during the five periods were 64.6, 57.8, 33.4, 30.2 and 35.6, respectively. A total of 731 individuals with CHD were identified over 25 years: 256 with definite MI, 254 with probable MI, and 221 with angina pectoris, and the number of CHD deaths was 178 cases. The features of the trends for the age groups 30-64, 65-74 and 75-84 were similar to those of the overall trend.

A similar trend was observed for age- and sex-adjusted incidence of CHD; the annual incidence of CHD per 100,000 person was 84.7, 87.0, 66.3, 48.2 and 55.9, respectively. The corresponding annual incidence of MI per 100,000 person was 47.7, 58.9, 48.8, 33.3 and 44.4 (not shown in Table).

The incidence of SCD was two to three times higher for men than for women, while age- and sex-adjusted annual incidence of SCD per 100,000 person during the five time periods were 93.5, 82.0, 44.5, 45.0 and 54.2 for men and 43.7, 39.5, 23.4, 16.7 and 18.2 for women (Table 1).

We further analyzed the incidence of SCD stratified by the presence or absence of MI, the time of symptom onset and the place of death (Figure 2). The age- and sex-adjusted annual incidence of SCD per 100,000 person was 13.4, 15.5, 11.8, 5.0 and 8.1 for SCD\_MI and 51.3, 42.3, 21.7, 25.2 and 27.6 for SCD\_NMI. The calculation of the incidence stratified by the time of symptom onset yielded age- and sex-adjusted annual incidence per 100,000 person of 23.4, 19.7, 10.5, 8.8 and 14.5 for SCD1, and 41.3, 38.1, 22.9, 21.5 and 20.4 for SCD1-24. The calculation of the incidence stratified by the place of death yielded the age- and sex-adjusted annual incidence per 100,000 person of 34.9, 25.1, 10.7, 10.9 and 10.2 for SCD\_NER, and 29.8, 32.7, 22.8, 19.4 and 25.5 for SCD\_ER. These trends showed similar

1  
2  
3 features to those of the overall trend. We also examined the incidences stratified by community, and  
4  
5 found these trends to be similar to the overall trend (data not shown).  
6  
7

8       Moreover, we estimated the national SCD incidence in 2009 by using the results from this study.  
9  
10 For this estimation, we multiplied the age- and sex-specific populations in 2009 by the age- and  
11  
12 sex-specific incidences of SCD from 2001 to 2005. For the population aged 85 or over, we used the  
13  
14 incidence of SCD for aged 75 to 84. We predicted the number of cases of SCD in Japan to be at least  
15  
16 49,500 cases in 2009.  
17  
18

19       As shown in Table 2, the overall trends for risk factors of SCD showed the same features for men  
20  
21 and women, except for diastolic BP, BMI, current smoking and heavy drinking. Mean diastolic BP for  
22  
23 women decreased from 1981-1985 to 2001-2005 ( $p$  for trend was  $<0.01$ ), whereas that for men was  
24  
25 constant from 1981-1985 to 1991-1995, but increased after 1996 ( $p$  for trend was  $<0.01$ ). For both men  
26  
27 and women, mean systolic BP decreased from 1981-1985 to 2001-2005 ( $p$  for trend was  $<0.01$ ). The  
28  
29 prevalence of hypertension decreased from 1981-1985 to 1991-1995, but plateaued after 1996 in both  
30  
31 sexes. The mean BMI for women declined from 1981-1985 to 2001-2005 ( $p$  for trend was  $<0.01$ ),  
32  
33 whereas BMI for men increased. The prevalence of both current smoking and heavy drinking  
34  
35 decreased constantly from 1981-1985 to 2001-2005 ( $p$  for trend was  $<0.01$ , for both) for men, but did  
36  
37 not change for women. Mean levels of total cholesterol, and the prevalence of diabetes mellitus  
38  
39 increased continuously from 1981-1985 to 2001-2005 ( $p$  for trend was  $<0.01$ , respectively) for both  
40  
41 sexes. The prevalence of left ventricular hypertrophy dramatically decreased from 1981-1985 to  
42  
43 2001-2005 ( $p$  for trend was  $<0.01$ , for both sexes). Additionally, we examined the risk factor stratified  
44  
45 by community, and found the same trends (not shown in table).  
46  
47  
48  
49  
50  
51

## 52 Discussion

53  
54 In this longitudinal community-based study from 1981 to 2005, we found that the age- and  
55  
56 sex-adjusted annual incidence of SCD decreased from 1981 to 1995, and plateaued thereafter. This  
57  
58  
59  
60

1  
2  
3 trend was similarly observed when SCD was stratified by the presence of MI, in which MI constituted  
4 approximately 20 to 35% of all SCD, the time of symptom onset, in which SCD within 1 hour  
5 constituted approximately 30% to 45% of all SCD, and the place of death, in which SCD in emergency  
6 room or hospital constituted approximately 45% to 70% of all SCD. Although the incidence of SCD  
7 was higher for men than for women consistent with previous reports [3,20], trends for the incidence of  
8 SCD did not vary according to age or sex. Since Japan is a rapidly aging country, the number of SCD  
9 in Japan, although much lower than in the United States [3], may increase in the future due to an  
10 increased elderly population.  
11  
12  
13  
14  
15  
16  
17  
18  
19

20  
21 Several population-based studies have previously reported the incidence of SCD among Japanese.  
22 The Hisayama study reported that the age-adjusted annual incidence rate of SCD between 1988 and  
23 2000 was 76 per 100,000 person-years for men and 19 per 100,000 person-years for women aged 40  
24 and over, and that the incidence rate did not change during the study period. However, the size of this  
25 population sample was 1,110 for men and 1,527 for women, which made it difficult to evaluate trends  
26 in the incidence of SCD [7]. Baba et al. reported that the annual SCD incidence was 45 per  
27 100,000 persons for men and 20 per 100,000 persons for women for subjects aged 20-74 in Suita City  
28 in 1992 [5]. Our study showed similar age-adjusted annual incidence of SCD (53 per 100,000 person  
29 for men and 18 per 100,000 person for women aged 30-84) in 2001-2005.  
30  
31  
32  
33  
34  
35  
36  
37  
38  
39

40 In Western countries, SCD accounts for almost half of all CHD deaths [2,21], while CHD  
41 accounted for at least 80% of all SCD cases [22]. In the present study, SCD accounts for 10% of all  
42 CHD deaths, while CHD accounted for 25% of all SCD cases which was generally consistent with the  
43 finding from a previous Japanese population-based study [20]. The lower incidence [11] and mortality  
44 [9,10,23] from CHD in Japan than in the United States probably correspond to the lower incidence of  
45 SCD in Japanese.  
46  
47  
48  
49  
50  
51  
52

53  
54 Several population-based studies have reported the age-adjusted annual incidence of MI among  
55 Japanese men and women [24-26]: 42.3 per 100,000 person for ages 20 years and more in 1988-1998  
56  
57  
58  
59  
60

1  
2  
3 [24], 45.8 per 100,000 population for ages 35-64 years in 1994-1996 [25], and 49.7 per 100,000 person  
4  
5 for ages 20 years and more in 1996-1998 [26]. In the present study, the age-adjusted annual incidence  
6  
7 of MI for ages 30-84 years was 33.3 to 58.9 per 100,000 person in 1981-2005. These findings confirm  
8  
9 the low incidence of CHD in Japan. However, Rumana et al. reported that the incidence of acute MI  
10  
11 increased from 1990-92 to 1999-2001 in the Takashima AMI Registry [26]. Furthermore, Kitamura et  
12  
13 al. reported a significant increase in the of CHD from 1980-87 to 1996-2003 for middle-aged men in an  
14  
15 urban community [11], which was involved in this CIRCS. Because the prevalence of overweight and  
16  
17 diabetes mellitus increased during the last two decades as seen in our study and other Japanese studies  
18  
19 [9,11,27], the incidence of SCD might increase in the future.  
20  
21  
22

23 We found in the data presented here that the incidence of SCD\_ER decreased from 1981 to 1995,  
24  
25 but plateaued after 1996, whereas the incidence of SCD\_NER has decreased steadily over time. The  
26  
27 plateauing trend of SCD\_ER may be due to the doubling of the number of patients transported to  
28  
29 emergency rooms by ambulance between 1996 and 2006 [28].  
30  
31

32 Risk factors for SCD among Americans have been identified as hypertension, hypertensive  
33  
34 organic change, elderly age, male sex, smoking, heavy drinking, overweight, diabetes and left  
35  
36 ventricular hypertrophy [3]. However, the risk factors for Japanese have not been so thoroughly  
37  
38 elucidated. Our study found that mean systolic BP decreased from 1981 to 2005, but mean diastolic BP  
39  
40 and the prevalence of hypertension increased from 1995 to 2005. Hypertension may be one of the most  
41  
42 important risk factors for SCD among Japanese [20], and we previously showed that hypertension was  
43  
44 associated with the incidence of SCD (the multivariable-adjusted OR was 1.51(95%CI, 1.04 to 2.18)  
45  
46 [29]) in the CIRCS. Therefore, the trend for hypertension is likely to correspond to the trend for the  
47  
48 incidence of SCD. Further, the SCD incidence decreased dramatically from 1981 to 1995, and this may  
49  
50 be due to a large reduction in the prevalence of heavy drinking and current smoking. Meanwhile, the  
51  
52 plateaued trend for SCD incidence from 1995 or later could be partly explained by potential adverse  
53  
54 effects of increased total cholesterol levels for men and women and the increased prevalence of  
55  
56  
57  
58  
59  
60

1  
2  
3  
4  
5  
6  
7  
8  
9  
10  
11  
12  
13  
14  
15  
16  
17  
18  
19  
20  
21  
22  
23  
24  
25  
26  
27  
28  
29  
30  
31  
32  
33  
34  
35  
36  
37  
38  
39  
40  
41  
42  
43  
44  
45  
46  
47  
48  
49  
50  
51  
52  
53  
54  
55  
56  
57  
58  
59  
60

overweight for in men and of diabetes mellitus for men and women.

The strength of the present study is that we analyzed trends for SCD using population-based data, including both urban and rural areas, from a large number of participants in a long-term observational study. The cause of death from death certificates was validated by medical records and/or information from next of kin. In addition, annual cardiovascular risk factor surveys ascertained the trends for predisposing risk factors of SCD.

Nonetheless, our study has a few limitations. First, we only examined the incidence of SCD for the age range of 30-84 years old. However the frequency of SCD among persons < 30 years old was less than 1 % even in the United States [3], so this age window is unlikely to substantially affect the results. Second, although clinical features and neuroimaging reports were used to exclude death due to stroke, some cases may have been misclassified, especially in the case of an out-of-hospital death. Such misclassification may well have affected the changes in the incidence of SCD occurred out-of-hospital.

In conclusion, age- and sex-adjusted incidence of SCD for a general Japanese population decreased from 1981-1985 to 1991-1995, and plateaued after 1996, corresponding to the trend for the prevalence of hypertension. The prevalence of some risk factors for SCD such as current smoking and heavy alcohol drinking has declined for men, but the prevalence of overweight for men, and of high total cholesterol and diabetes mellitus for men and women has increased. We suggest that continuous surveillance will be needed to clarify future trends for the incidence of SCD and its risk factors in Japan.

Table 1. Trends for age- and sex- adjusted incidence of sudden cardiac death per 100,000 person among 30 to 84 year-old men and women in four Japanese general populations from 1981 to 2005, CIRCIS

|                                                                | 1981-1985 | 1986-1990 | 1991-1995 | 1996-2000 | 2001-2005 | p for trend |
|----------------------------------------------------------------|-----------|-----------|-----------|-----------|-----------|-------------|
| <b>Total</b>                                                   |           |           |           |           |           |             |
| No of cases                                                    | 114       | 101       | 83        | 76        | 97        |             |
| Age- and sex-adjusted incidence<br>( Incidence/100,000 person) | 64.6      | 57.8      | 33.4      | 30.2      | 35.6      | < 0.01      |
| Age- and sex-adjusted incidence<br>( Incidence/100,000 person) |           |           |           |           |           |             |
| 30-64 y                                                        | 20.6      | 19.7      | 14.9      | 12.3      | 16.8      | 0.367       |
| 65-74 y                                                        | 191.3     | 100.1     | 77.5      | 80.1      | 100.1     | 0.004       |
| 75-84 y                                                        | 445.9     | 526.8     | 212.3     | 189.2     | 177.2     | < 0.01      |
| <b>Men</b>                                                     |           |           |           |           |           |             |
| No of cases                                                    | 70        | 61        | 49        | 50        | 67        |             |
| Age- and sex-adjusted incidence<br>( Incidence/100,000 person) | 93.5      | 82.0      | 44.5      | 45.0      | 54.2      | < 0.01      |
| Age- and sex-adjusted incidence<br>( Incidence/100,000 person) |           |           |           |           |           |             |
| 30-64 y                                                        | 33.9      | 31.6      | 22.8      | 21.4      | 27.4      | 0.629       |
| 65-74 y                                                        | 174.8     | 118.8     | 95.8      | 133.6     | 170.6     | 0.759       |
| 75-84 y                                                        | 795.7     | 742.3     | 255.2     | 206.1     | 204.7     | < 0.01      |
| <b>Women</b>                                                   |           |           |           |           |           |             |
| No of cases                                                    | 44        | 40        | 34        | 26        | 30        |             |
| Age- and sex-adjusted incidence<br>( Incidence/100,000 person) | 43.7      | 39.5      | 23.4      | 16.7      | 18.2      | < 0.01      |
| Age- and sex-adjusted incidence<br>( Incidence/100,000 person) |           |           |           |           |           |             |
| 30-64 y                                                        | 9.3       | 9.4       | 7.1       | 3.3       | 6.3       | 0.247       |
| 65-74 y                                                        | 203.0     | 86.7      | 62.8      | 34.6      | 35.0      | < 0.01      |
| 75-84 y                                                        | 214.8     | 381.1     | 181.0     | 176.0     | 158.3     | 0.036       |

Table 2. Trends for age- and sex-adjusted cardiovascular risk characteristics among 30 to 84 year-old men and women in four Japanese general populations from 1981 to 2005, CIRCIS

|                                               | 1981-1985 | 1986-1990 | 1991-1995 | 1996-2000 | 2001-2005 | p for trend |
|-----------------------------------------------|-----------|-----------|-----------|-----------|-----------|-------------|
| Age-adjusted, mean or percent                 |           |           |           |           |           |             |
| Men                                           |           |           |           |           |           |             |
| Number                                        | 5350      | 4992      | 4836      | 4432      | 4900      |             |
| Age, year                                     | 54        | 55        | 58        | 59        | 60        |             |
| Systolic blood pressure, mmHg                 | 136       | 134       | 132       | 133       | 132       | <0.01       |
| Diastolic blood pressure, mmHg                | 81        | 81        | 81        | 82        | 82        | <0.01       |
| Antihypertensive medication, %                | 17.9      | 16.8      | 15.6      | 16.1      | 18.5      | 0.427       |
| Hypertension, %                               | 44.3      | 39.1      | 35.3      | 37.8      | 38.3      | <0.01       |
| Body mass index, kg/m <sup>2</sup>            | 22.7      | 22.9      | 23.2      | 23.4      | 23.8      | <0.01       |
| Total cholesterol, mg/dl                      | 187       | 192       | 195       | 202       | 205       | <0.01       |
| %                                             |           |           |           |           |           |             |
| Overweight (BMI≥25kg/m <sup>2</sup> )         | 25.1      | 28.2      | 30.5      | 34.8      | 33.9      | <0.01       |
| Total cholesterol≥5.69 mmol/L                 | 16.7      | 19.9      | 22.7      | 28.5      | 30.9      | <0.01       |
| Diabetes mellitus                             | 4.2       | 6.3       | 6.6       | 7.0       | 8.7       | <0.01       |
| Heavy drinking(ethanol intake ≥46g/day)       | 31.0      | 27.6      | 26.1      | 25.0      | 21.1      | <0.01       |
| Current smoking                               | 60.6      | 56.2      | 52.6      | 49.2      | 45.0      | <0.01       |
| ECG findings                                  |           |           |           |           |           |             |
| Atrial fibrillation                           | 1.2       | 1.4       | 1.3       | 1.1       | 1.2       | 0.549       |
| Ventricular premature contraction             | 2.8       | 2.7       | 3.1       | 2.5       | 2.3       | 0.063       |
| Supraventricular premature contraction        | 3.1       | 4.3       | 4.0       | 3.3       | 3.4       | 0.628       |
| Major ST-T abnormality                        | 4.7       | 4.1       | 3.6       | 3.8       | 4.0       | 0.021       |
| Minor ST-T abnormality                        | 13.4      | 10.9      | 14.2      | 12.6      | 12.4      | 0.711       |
| PQ prolonged                                  | 1.4       | 1.1       | 1.5       | 1.3       | 1.1       | 0.492       |
| Complete/incomplete right bundle branch block | 5.2       | 5.1       | 5.5       | 5.9       | 6.6       | <0.01       |
| Wide QRS                                      | 3.0       | 3.0       | 3.3       | 3.7       | 4.1       | <0.01       |
| Abnormal Q wave                               | 0.5       | 0.7       | 0.6       | 0.6       | 0.7       | 0.637       |
| Left ventricular hypertrophy                  | 26.7      | 25.4      | 20.6      | 17.4      | 15.3      | <0.01       |
| Women                                         |           |           |           |           |           |             |
| Number                                        | 7949      | 7781      | 7975      | 7466      | 8082      |             |
| Age, year                                     | 53        | 54        | 55        | 57        | 57        |             |
| Systolic blood pressure, mmHg                 | 134       | 131       | 130       | 129       | 128       | <0.01       |
| Diastolic blood pressure, mmHg                | 79        | 78        | 78        | 79        | 77        | <0.01       |
| Antihypertensive medication, %                | 17.9      | 17.4      | 16.0      | 15.4      | 17.1      | 0.002       |
| Hypertension, %                               | 39.4      | 34.8      | 31.6      | 31.6      | 31.5      | <0.01       |
| Body mass index, kg/m <sup>2</sup>            | 23.2      | 23.2      | 23.1      | 23.1      | 23.0      | <0.01       |
| Total cholesterol, mg/dl                      | 200       | 205       | 206       | 213       | 215       | <0.01       |
| %                                             |           |           |           |           |           |             |
| Overweight (BMI≥25kg/m <sup>2</sup> )         | 31.8      | 31.2      | 30.6      | 29.9      | 25.9      | <0.01       |
| Total cholesterol≥5.69 mmol/L                 | 28.1      | 31.8      | 33.5      | 41.3      | 42.6      | <0.01       |
| Diabetes mellitus                             | 2.5       | 3.6       | 3.2       | 3.4       | 3.8       | <0.01       |
| Heavy drinking(ethanol intake ≥46g/day)       | 0.5       | 0.4       | 0.4       | 0.5       | 0.6       | 0.417       |
| Current smoking                               | 7.7       | 7.0       | 6.9       | 7.2       | 8.3       | 0.273       |
| ECG findings                                  |           |           |           |           |           |             |
| Atrial fibrillation                           | 0.6       | 0.6       | 0.4       | 0.3       | 0.3       | <0.01       |
| Ventricular premature contraction             | 1.9       | 2.2       | 1.7       | 1.9       | 2.2       | 0.785       |
| Supraventricular premature contraction        | 2.4       | 2.6       | 3.0       | 2.8       | 2.8       | 0.169       |
| Major ST-T abnormality                        | 6.6       | 6.1       | 5.2       | 4.4       | 4.9       | <0.01       |
| Minor ST-T abnormality                        | 23.5      | 20.0      | 22.4      | 21.1      | 18.7      | <0.01       |
| PQ prolonged                                  | 0.6       | 0.5       | 0.5       | 0.5       | 0.4       | 0.277       |
| Complete/incomplete right bundle branch block | 3.5       | 3.4       | 3.2       | 3.0       | 3.2       | 0.063       |
| Wide QRS                                      | 1.5       | 1.6       | 1.7       | 1.5       | 1.6       | 0.854       |
| Abnormal Q wave                               | 0.1       | 0.2       | 0.2       | 0.2       | 0.4       | 0.016       |
| Left ventricular hypertrophy                  | 10.4      | 9.0       | 7.3       | 5.1       | 4.4       | <0.01       |

## Acknowledgment

The authors thank the other investigators, the staff, and the participants of the CIRCS for their valuable contributions. We acknowledge Drs Hiromichi Kimura, Sachiko Masuda, and Toshihiko Yamada, The University of Tokyo and Dr Koji Tachikawa, University of Nagoya for their valuable comments on the manuscript.

## Disclosures

None declared.

## Funding

This work was supported in part by grant from the Japanese Ministry of Education, Culture, Sports, Science and Technology (Grant-in-Aid for research C: 21590731).

## Reference list

1. Chugh SS, Jui J, Gunson K, Stecker EC, et al. Current burden of sudden cardiac death: Multiple source surveillance versus retrospective death certificate-based review in a Large U.S. Community. *J Am Coll Cardiol.* 2004; 44:1268-1275.
2. Myerburg RJ, Kessler KM, Castellanos A. Sudden cardiac death: epidemiology, transient risk, and intervention assessment. *Ann Intern Med.* 1993;119:1187-1197.
3. Zheng ZI, Croft JB, Giles WH, et al. Sudden cardiac death in the United States, 1989 to 1998. *Circulation.* 2001;104:2158-63.
4. Adabag, AS. Lueqker, RV. Roger, VL. Gersh, BJ. Sudden cardiac death: epidemiology and risk factors. *Nat. Rev. Cardiol.* 2010; 7: 216-25.
5. Baba S, Konishi M, Asano G, et al. Survey of Sudden cardiac death for the complete medical recode in a large city – consider the frequency and underlying and background factor in Japanese. *JACD.*



- 1996; 31:100-6.
6. Toyoshima H, Hayashi S, Tanabe N, et al. Estimation of the proportional rate of ischemic heart disease in sudden death from death certificate and registration surveys in Niigata prefecture in Japanese. *JACD*. 1996; 31:93-9.
  7. Kubo M, Kiyohara Y, Kato I, et al. Trends in the incidence, mortality, and survival rate of cardiovascular disease in a Japanese community: The Hisayama Study. *Stroke*. 2003; 34:2349-54.
  8. Kawamura T, Kondo H, Hirai M, et al. Sudden death in the working population. A collaborative study in central Japan. *Eur Heart J*. 1999; 20:338-43.
  9. Iso H. Changes in coronary heart disease risk among Japanese. *Circulation*. 2008; 118:2725-29.
  10. Baba S, Ozawa H, Sakai Y, et al. Heart disease deaths in a Japanese urban area evaluated by clinical and police records. *Circulation*. 1994; 89:109-15.
  11. Kitamura A, Sato S, Kiyama M, et al. Trends in the incidence of coronary heart disease and stroke and their risk factors in Japan, 1964 to 2003. The Akita-Osaka Study. *JACC*. 2008; 52:71-9.
  12. Shimamoto T, Komachi Y, Inaba H, et al. Trends for coronary heart disease and stroke and their risk factors in Japan. *Circulation* 1989;79:503-15.
  13. Kitamura A, Iso H, Iida M, et al. Trends in the incidence of coronary heart disease and stroke and the prevalence of cardiovascular risk factors among Japanese men from 1963 to 1994. *Am J Med* 2002;112:104-9.
  14. Imano H, Kitamura A, Sato S, et al. Trends for blood pressure and its contribution to stroke incidence in the middle-aged Japanese population. The Circulatory Risk in Communities Study (CIRCS). *Stroke* 2009;40:1571-77.
  15. International guidelines for ethical review of epidemiological studies. *Law Med Health Care*. 1991;19:247-58.
  16. WHO Expert Committee: Arterial Hypertension and Ischemic Heart Disease, Preventive Aspects. Geneva, WHO Technical Report Series No231, 1962.

- 1  
2  
3  
4 17. Tunstall-Pedoe H, Kuulasmaa K, Amouyel P, et al. Myocardial infarction and coronary deaths in  
5  
6 the World Health Organization MONICA Project. Registration Procedures, event rates, and  
7  
8 case-fatality rates in 38 populations from 21 countries in four continents.  
9  
10 *Circulation* 1994;90:583-612.
- 11  
12 18. Kannel WB, Wilson PWF, D'Agostino RB, Cobb J. Sudden coronary death in women. *Am Heart*  
13  
14 *J.* 1998; 136:205-12.
- 15  
16 19. De Bacquer D, De Backer G, Kornitzer M, et al. Prognostic value of ECG findings for total,  
17  
18 cardiovascular disease, and coronary heart disease death in men and women. *Heart.*  
19  
20 1998;80:570-77.
- 21  
22 20. Tanabe N, Toyoshima H, Hayashi S, et al. Epidemiology of sudden death in Japan. *Jpn J*  
23  
24 *Electrocardiology.* 2006; 26:111-17. (in Japanese)
- 25  
26 21. Fox CS, Evans JC, Larson MG, et al. Temporal trends in coronary heart disease mortality and  
27  
28 sudden cardiac death from 1950 to 1999: The Framingham Heart Study. *Circulation.* 2004;  
29  
30 110:522-27.
- 31  
32 22. Myerburg, RJ. Sudden Cardiac Death: Exploring the Limits of Our Knowledge. *J Cardiovasc*  
33  
34 *Electrophysiol.* 2001; 12:369-81.
- 35  
36 23. Saito I, Folsom AR, Aono H, et al. Comparison of fatal coronary heart disease occurrence based on  
37  
38 population surveys in Japan and the USA. *Int J Epidemiol.* 2000; 29:837-44.
- 39  
40 24. Yoshida M, Yoshikuni K, Nakamura Y, et al. Incidence of acute myocardial infarction in  
41  
42 Takashima, Shiga, Japan. *Circ J* 2005;69:404-08.
- 43  
44 25. Tanabe N, Saito R, Sato T, et al. Event rates of acute myocardial infarction and coronary death in  
45  
46 Niigata and Nagaoka Cities in Japan. *Circ J* 2003;67:40-5.
- 47  
48 26. Rumana N, Kita Y, Turin TC, et al. Trend of increase in the incidence of acute myocardial  
49  
50 infarction in a Japanese population. Takashima AMI registry, 1990-2001. *Am J Epidemiol.* 2008;  
51  
52 167:1358-64.
- 53  
54  
55  
56  
57  
58  
59  
60

- 1  
2  
3  
4  
5  
6  
7  
8  
9  
10  
11  
12  
13  
14  
15  
16  
17  
18  
19  
20  
21  
22  
23  
24  
25  
26  
27  
28  
29  
30  
31  
32  
33  
34  
35  
36  
37  
38  
39  
40  
41  
42  
43  
44  
45  
46  
47  
48  
49  
50  
51  
52  
53  
54  
55  
56  
57  
58  
59  
60
27. Islam MM, Horibe H, Kobayashi F. Current trend in prevalence of diabetes mellitus in Japan, 1964-1992. *J Epidemiol.* 1999;9:155-62.
28. Fire and Disaster management agency: Current state of emergency rescue in Japan 2006. ([http:// www.mhlw.go.jp/shingi/2008/07/dl/s0717-7c.pdf](http://www.mhlw.go.jp/shingi/2008/07/dl/s0717-7c.pdf)) (Accessed 17 July 2009)
29. Ohira T, Kinuta M, Imano H, et al. Risk Factors for Sudden Cardiac Death among Japanese: The Circulatory Risk in Communities Study (CIRCS)[abstract]. American Heart Association 50th Annual Conference on Cardiovascular Disease Epidemiology and Prevention. 2010:P214.

### Author's individual contributions

Minako Maruyama analysed and interpreted the data, drafted the manuscript, and provided statistical expertise. Akihiko Kitamura, Masahiko Kiyama, Takeo Okada, Kenji Maeda, Yoshinori Ishikawa and Takashi Shimamoto acquired the data and critically revised the manuscript. Tetsuya Ohira, Hironori Imano, Hiroyuki Noda, Kazumasa Yamagishi and Hiroyasu Iso conceived and designed the study, acquired and interpreted the data, and critically revised the manuscript.

### Appendix

#### CIRCS Study Collaborators

The Circulatory Risk in Communities Study (CIRCS) is a collaborative study managed by the Osaka Medical Center for Health Science and Promotion, University of Tsukuba, Osaka University and Ehime University. The CIRCS investigators who contributed to this study are as follows: Masamitsu Konishi, Yoshinori Ishikawa, Akihiko Kitamura, Masahiko Kiyama, Takeo Okada, Kenji Maeda, Masakazu Nakamura MD, Masatoshi Ido, Masakazu Nakamura PhD, Takashi Shimamoto, Minoru Iida and Yoshio Komachi, Osaka Medical Center for Health Science and Promotion, Osaka; Yoshihiko Naito, Mukogawa Women's University, Nishinomiya; Tomonori Okamura, National Cardiovascular Center, Suita; Shinichi Sato, Chiba Prefectural Institute of Public Health, Chiba; Tomoko Sankai,

1  
2  
3 Kazumasa Yamagishi, Kyoko Kirii, Mitsumasa Umesawa, ChoyLye Chei, Kimiko Yokota and Minako  
4  
5 Tabata, University of Tsukuba, Tsukuba; Hiroyasu Iso, Tetsuya Ohira, Renzhe Cui, Hironori Imano, Ai  
6  
7 Ikeda , Satoyo Ikehara, Isao Muraki and Minako Maruyama, Osaka University, Suita; Takeshi  
8  
9  
10 Tanigawa, Isao Saito, Katsutoshi Okada and Susumu Sakurai, Ehime University, Toon; Masayuki Yao,  
11  
12 Ranryoen Hospital, Ibaraki; and Hiroyuki Noda, Osaka University Hospital, Suita.  
13

#### 14 15 16 17 **Data sharing statement**

18 There is no additional data available.  
19  
20  
21  
22  
23  
24  
25  
26  
27  
28  
29  
30  
31  
32  
33  
34  
35  
36  
37  
38  
39  
40  
41  
42  
43  
44  
45  
46  
47  
48  
49  
50  
51  
52  
53  
54  
55  
56  
57  
58  
59  
60

**Figure Legends**

Figure 1. Determination of sudden cardiac death (SCD)

Figure 2. Trends for age- and sex-adjusted annual incidence of sudden cardiac death, stratified by the presence or absence of myocardial infarction (MI), the time of symptom onset and the place of death. Annual incidence per 100,000 person among men and women aged 30-84 in four general Japanese populations from 1981 to 2005, CIRCS. SCD with MI (SCD\_MI) and SCD without MI (SCD\_NMI), SCD within 1 hour (SCD1) and SCD between 1 and 24 hours (SCD1-24). SCD in emergency room or a hospital (SCD\_ER) and SCD outside of a hospital (SCD\_NER).

**Figure 1**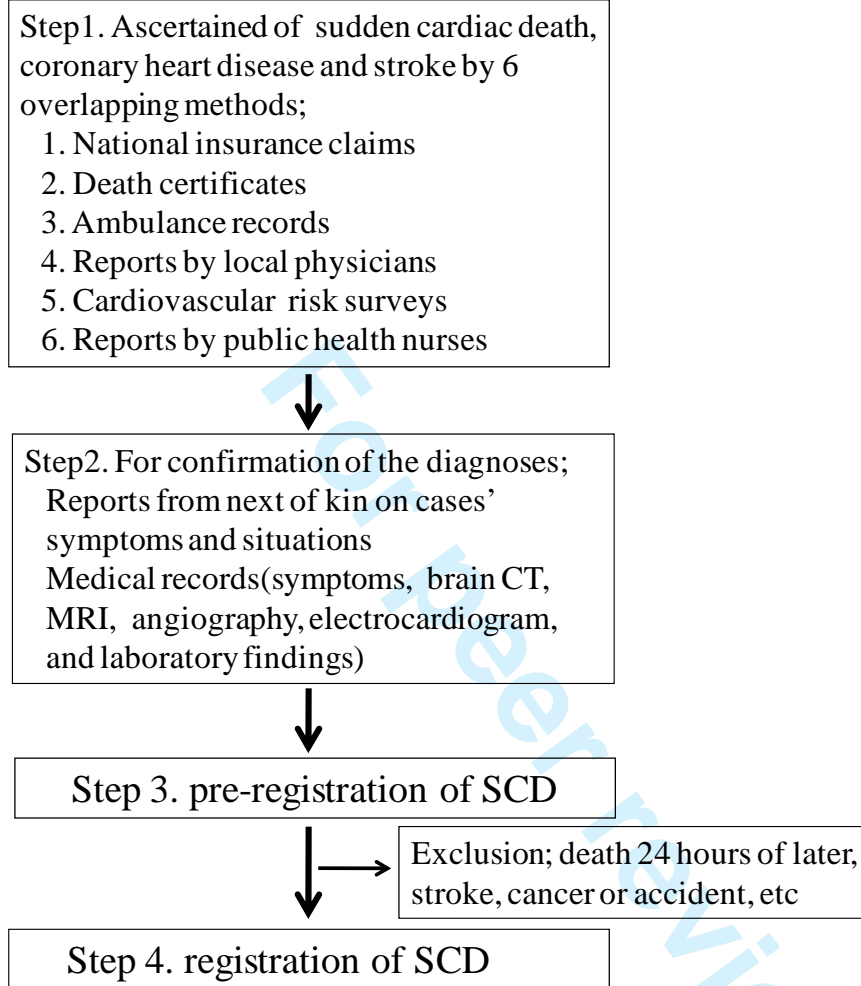

Figure 2

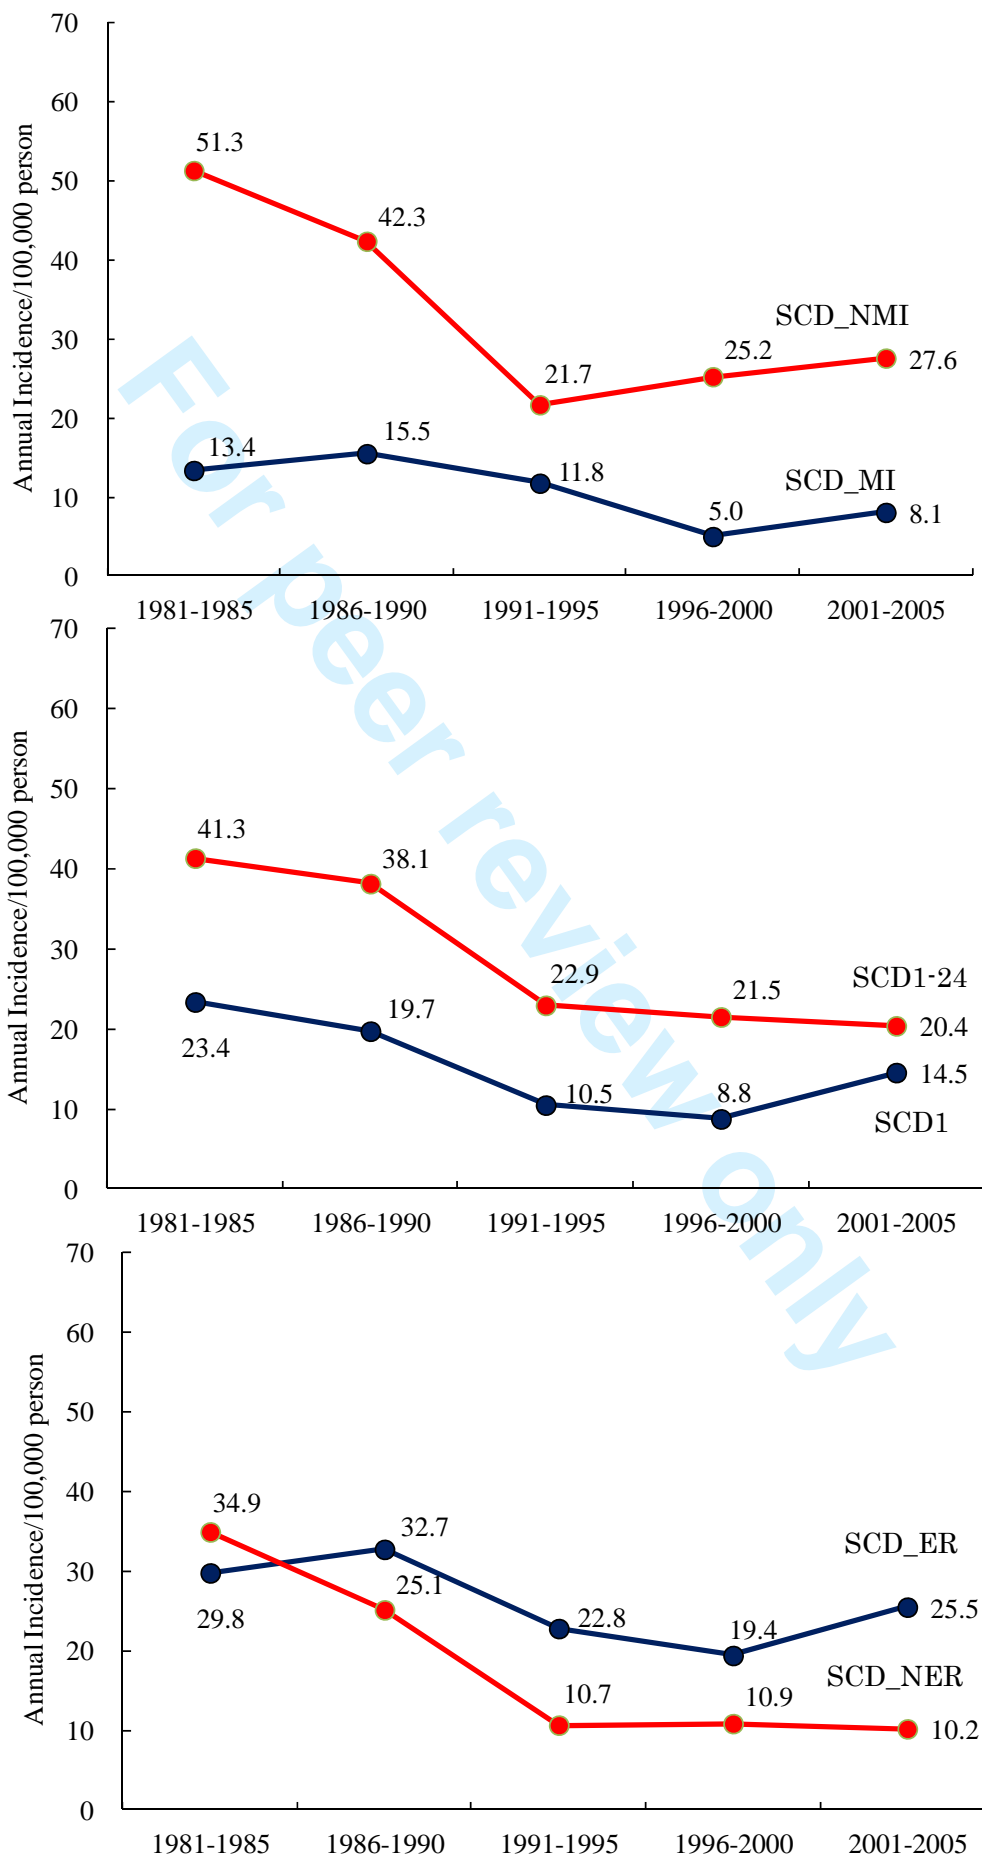

**STROBE 2007 (v4) checklist of items to be included in reports of observational studies in epidemiology\***  
**Checklist for cohort, case-control, and cross-sectional studies (combined)**

| Section/Topic             | Item # | Recommendation                                                                                                                                                                                                                                                                                                                                                                                                                                                         | Reported on page # |
|---------------------------|--------|------------------------------------------------------------------------------------------------------------------------------------------------------------------------------------------------------------------------------------------------------------------------------------------------------------------------------------------------------------------------------------------------------------------------------------------------------------------------|--------------------|
| Title and abstract        | 1      | (a) Indicate the study's design with a commonly used term in the title or the abstract                                                                                                                                                                                                                                                                                                                                                                                 | 1,3                |
|                           |        | (b) Provide in the abstract an informative and balanced summary of what was done and what was found                                                                                                                                                                                                                                                                                                                                                                    | 3                  |
| <b>Introduction</b>       |        |                                                                                                                                                                                                                                                                                                                                                                                                                                                                        |                    |
| Background/rationale      | 2      | Explain the scientific background and rationale for the investigation being reported                                                                                                                                                                                                                                                                                                                                                                                   | 4                  |
| Objectives                | 3      | State specific objectives, including any pre-specified hypotheses                                                                                                                                                                                                                                                                                                                                                                                                      | 4                  |
| <b>Methods</b>            |        |                                                                                                                                                                                                                                                                                                                                                                                                                                                                        |                    |
| Study design              | 4      | Present key elements of study design early in the paper                                                                                                                                                                                                                                                                                                                                                                                                                | 5                  |
| Setting                   | 5      | Describe the setting, locations, and relevant dates, including periods of recruitment, exposure, follow-up, and data collection                                                                                                                                                                                                                                                                                                                                        | 5                  |
| Participants              | 6      | (a) <i>Cohort study</i> —Give the eligibility criteria, and the sources and methods of selection of participants. Describe methods of follow-up<br><i>Case-control study</i> —Give the eligibility criteria, and the sources and methods of case ascertainment and control selection. Give the rationale for the choice of cases and controls<br><i>Cross-sectional study</i> —Give the eligibility criteria, and the sources and methods of selection of participants | 5                  |
|                           |        | (b) <i>Cohort study</i> —For matched studies, give matching criteria and number of exposed and unexposed<br><i>Case-control study</i> —For matched studies, give matching criteria and the number of controls per case                                                                                                                                                                                                                                                 |                    |
| Variables                 | 7      | Clearly define all outcomes, exposures, predictors, potential confounders, and effect modifiers. Give diagnostic criteria, if applicable                                                                                                                                                                                                                                                                                                                               | 6,7                |
| Data sources/ measurement | 8*     | For each variable of interest, give sources of data and details of methods of assessment (measurement). Describe comparability of assessment methods if there is more than one group                                                                                                                                                                                                                                                                                   | 6,7                |
| Bias                      | 9      | Describe any efforts to address potential sources of bias                                                                                                                                                                                                                                                                                                                                                                                                              | 5,6,7              |
| Study size                | 10     | Explain how the study size was arrived at                                                                                                                                                                                                                                                                                                                                                                                                                              | 5                  |
| Quantitative variables    | 11     | Explain how quantitative variables were handled in the analyses. If applicable, describe which groupings were chosen and why                                                                                                                                                                                                                                                                                                                                           | 7                  |
| Statistical methods       | 12     | (a) Describe all statistical methods, including those used to control for confounding                                                                                                                                                                                                                                                                                                                                                                                  | 7                  |
|                           |        | (b) Describe any methods used to examine subgroups and interactions                                                                                                                                                                                                                                                                                                                                                                                                    | 6                  |
|                           |        | (c) Explain how missing data were addressed                                                                                                                                                                                                                                                                                                                                                                                                                            |                    |
|                           |        | (d) <i>Cohort study</i> —If applicable, explain how loss to follow-up was addressed<br><i>Case-control study</i> —If applicable, explain how matching of cases and controls was addressed                                                                                                                                                                                                                                                                              |                    |



|                          |     |                                                                                                                                                                                                              |           |
|--------------------------|-----|--------------------------------------------------------------------------------------------------------------------------------------------------------------------------------------------------------------|-----------|
|                          |     | <i>Cross-sectional study</i> —If applicable, describe analytical methods taking account of sampling strategy                                                                                                 |           |
|                          |     | (e) Describe any sensitivity analyses                                                                                                                                                                        |           |
| <b>Results</b>           |     |                                                                                                                                                                                                              |           |
| Participants             | 13* | (a) Report numbers of individuals at each stage of study—eg numbers potentially eligible, examined for eligibility, confirmed eligible, included in the study, completing follow-up, and analysed            | 8         |
|                          |     | (b) Give reasons for non-participation at each stage                                                                                                                                                         |           |
|                          |     | (c) Consider use of a flow diagram                                                                                                                                                                           | 5,figure1 |
| Descriptive data         | 14* | (a) Give characteristics of study participants (eg demographic, clinical, social) and information on exposures and potential confounders                                                                     | 9         |
|                          |     | (b) Indicate number of participants with missing data for each variable of interest                                                                                                                          |           |
|                          |     | (c) <i>Cohort study</i> —Summarise follow-up time (eg, average and total amount)                                                                                                                             |           |
| Outcome data             | 15* | <i>Cohort study</i> —Report numbers of outcome events or summary measures over time                                                                                                                          |           |
|                          |     | <i>Case-control study</i> —Report numbers in each exposure category, or summary measures of exposure                                                                                                         |           |
|                          |     | <i>Cross-sectional study</i> —Report numbers of outcome events or summary measures                                                                                                                           | 8,table1  |
| Main results             | 16  | (a) Give unadjusted estimates and, if applicable, confounder-adjusted estimates and their precision (eg, 95% confidence interval). Make clear which confounders were adjusted for and why they were included | 8         |
|                          |     | (b) Report category boundaries when continuous variables were categorized                                                                                                                                    | 7         |
|                          |     | (c) If relevant, consider translating estimates of relative risk into absolute risk for a meaningful time period                                                                                             |           |
| Other analyses           | 17  | Report other analyses done—eg analyses of subgroups and interactions, and sensitivity analyses                                                                                                               | 8         |
| <b>Discussion</b>        |     |                                                                                                                                                                                                              |           |
| Key results              | 18  | Summarise key results with reference to study objectives                                                                                                                                                     | 9,10      |
| Limitations              | 19  | Discuss limitations of the study, taking into account sources of potential bias or imprecision. Discuss both direction and magnitude of any potential bias                                                   | 12        |
| Interpretation           | 20  | Give a cautious overall interpretation of results considering objectives, limitations, multiplicity of analyses, results from similar studies, and other relevant evidence                                   | 11        |
| Generalisability         | 21  | Discuss the generalisability (external validity) of the study results                                                                                                                                        | 12        |
| <b>Other information</b> |     |                                                                                                                                                                                                              |           |
| Funding                  | 22  | Give the source of funding and the role of the funders for the present study and, if applicable, for the original study on which the present article is based                                                | 15        |

\*Give information separately for cases and controls in case-control studies and, if applicable, for exposed and unexposed groups in cohort and cross-sectional studies.

**Note:** An Explanation and Elaboration article discusses each checklist item and gives methodological background and published examples of transparent reporting. The STROBE checklist is best used in conjunction with this article (freely available on the Web sites of PLoS Medicine at <http://www.plosmedicine.org/>, Annals of Internal Medicine at <http://www.annals.org/>, and Epidemiology at <http://www.epidem.com/>). Information on the STROBE Initiative is available at [www.strobe-statement.org](http://www.strobe-statement.org).



**Trends in Sudden Cardiac Death and Its Risk Factors in Japan from 1981 to 2005: time-trend analysis from the Circulatory Risk in Communities Study (CIRCS)**

|                                 |                                                                                                                                                                                                                                                                                                                                                                                                                                                                                                                                                                                                                                                                                                                                                                                                                                                                                                                                                                                                                                                                                                                                             |
|---------------------------------|---------------------------------------------------------------------------------------------------------------------------------------------------------------------------------------------------------------------------------------------------------------------------------------------------------------------------------------------------------------------------------------------------------------------------------------------------------------------------------------------------------------------------------------------------------------------------------------------------------------------------------------------------------------------------------------------------------------------------------------------------------------------------------------------------------------------------------------------------------------------------------------------------------------------------------------------------------------------------------------------------------------------------------------------------------------------------------------------------------------------------------------------|
| Journal:                        | <i>BMJ Open</i>                                                                                                                                                                                                                                                                                                                                                                                                                                                                                                                                                                                                                                                                                                                                                                                                                                                                                                                                                                                                                                                                                                                             |
| Manuscript ID:                  | bmjopen-2011-000573.R1                                                                                                                                                                                                                                                                                                                                                                                                                                                                                                                                                                                                                                                                                                                                                                                                                                                                                                                                                                                                                                                                                                                      |
| Article Type:                   | Research                                                                                                                                                                                                                                                                                                                                                                                                                                                                                                                                                                                                                                                                                                                                                                                                                                                                                                                                                                                                                                                                                                                                    |
| Date Submitted by the Author:   | 08-Jan-2012                                                                                                                                                                                                                                                                                                                                                                                                                                                                                                                                                                                                                                                                                                                                                                                                                                                                                                                                                                                                                                                                                                                                 |
| Complete List of Authors:       | Maruyama, Minako; Osaka University Graduate School of Medicine, Public Health, Department of Social and Environmental Medicine<br>Ohira, Tetsuya; Osaka University Graduate School of Medicine, Public Health, Department of Social and Environmental Medicine<br>Imano, Hironori; Osaka University Graduate School of Medicine, Public Health, Department of Social and Environmental Medicine<br>Kitamura, Akihiko; Osaka Medical Center for Health Science and Promotion, Kiyama, Masahiko; Osaka Medical Center for Health Science and Promotion,<br>Okada, Takeo; Osaka Medical Center for Health Science and Promotion, Maeda, Kenji; Osaka Medical Center for Health Science and Promotion, Yamagishi, Kazumasa; Department of Public Health Medicine, University of Tsukuba,<br>Noda, Hiroyuki; Medical Center for Translational Research, Ishikawa, Yoshinori; Osaka Medical Center for Health Science and Promotion,<br>Shimamoto, Takashi; Osaka Medical Center for Health Science and Promotion,<br>Iso, Hiroyasu; Osaka University Graduate School of Medicine, Public Health, Department of Social and Environmental Medicine |
| <b>Primary Subject Heading</b>: | Epidemiology                                                                                                                                                                                                                                                                                                                                                                                                                                                                                                                                                                                                                                                                                                                                                                                                                                                                                                                                                                                                                                                                                                                                |
| Secondary Subject Heading:      | Public health                                                                                                                                                                                                                                                                                                                                                                                                                                                                                                                                                                                                                                                                                                                                                                                                                                                                                                                                                                                                                                                                                                                               |
| Keywords:                       | Hypertension < CARDIOLOGY, Coronary heart disease < CARDIOLOGY, EPIDEMIOLOGY                                                                                                                                                                                                                                                                                                                                                                                                                                                                                                                                                                                                                                                                                                                                                                                                                                                                                                                                                                                                                                                                |
|                                 |                                                                                                                                                                                                                                                                                                                                                                                                                                                                                                                                                                                                                                                                                                                                                                                                                                                                                                                                                                                                                                                                                                                                             |

SCHOLARONE™  
Manuscripts

1  
2  
3 Trends in Sudden Cardiac Death and Its Risk Factors in Japan from 1981 to 2005: The Circulatory  
4 Risk in Communities Study (CIRCS)  
5  
6

7  
8  
9  
10 Minako Maruyama, MSc<sup>1,2</sup>, Tetsuya Ohira, MD<sup>1,2</sup>, Hironori Imano, MD<sup>1,2</sup>, Akihiko Kitamura, MD<sup>2</sup>,  
11 Masahiko Kiyama, MD<sup>2</sup>, Takeo Okada, MD<sup>2</sup>, Kenji Maeda, MD<sup>2</sup>, Kazumasa Yamagishi, MD<sup>2,3</sup>,  
12 Hiroyuki Noda, MD<sup>2,4</sup>, Yoshinori Ishikawa, MD<sup>2</sup>, Takashi Shimamoto, MD<sup>2</sup>, Hiroyasu Iso, MD<sup>1\*</sup>.  
13  
14  
15  
16

17  
18  
19 <sup>1</sup>Department of Social and Environmental Medicine, Osaka University, Suita, JAPAN

20  
21 <sup>2</sup>Osaka Medical Center for Health Science and Promotion, Osaka, JAPAN

22  
23 <sup>3</sup>Department of Public Health Medicine, University of Tsukuba, Tsukuba, JAPAN

24  
25 <sup>4</sup>Medical Center for Translational Research, Osaka University Hospital, Suita, JAPAN  
26  
27

28  
29  
30 \*Corresponding author. Hiroyasu Iso, MD, PhD, MPH, Professor of Public Health, Department of  
31 Social and Environmental Medicine, Osaka University Graduate School of Medicine, 2-2 Yamadaoka,  
32 Suita, Osaka 565-0871 JAPAN.  
33

34  
35 Phone: +81-6-6879-3911, Fax: +81-6-6879-3919, E-mail:iso@pbhel.med.osaka-u.ac.jp  
36  
37

38  
39  
40 **Key words:** sudden cardiac death, incidence, general population, Japanese  
41  
42

43  
44  
45 **Word counts:**3,362words  
46  
47  
48  
49  
50  
51  
52  
53  
54  
55  
56  
57  
58  
59  
60

## Abstract

**Objective** - There is little evidence whether sudden cardiac death (SCD) increases in Asia, although the incidence of coronary heart disease among urban middle-aged Japanese men has increased recently.

Then, we examined trends for the incidence of SCD and its risk factors in the Circulatory Risk in Communities Study (CIRCS).

**Design and Setting** - Population-based longitudinal study. Surveillance of men and women for the SCD incidence and risk factors was conducted from 1981 to 2005.

**Subjects** - The surveyed population was all residents of men and women aged 30 to 84 years in three rural and an urban communities in Japan.

**Main outcome measures** - Trends in SCD incidence and its risk factors.

**Results** - Age- and sex-adjusted incidence of SCD decreased from 1981-1985 to 1991-1995, and plateaued thereafter; the annual incidence per 100,000 person-year in the 5 time periods was 76.0, 57.9, 39.3, 31.6, and 36.8, respectively. The prevalence of hypertension decreased from 1981-1985 to 1991-1995, and plateaued thereafter for both men and women. The age- adjusted prevalence of current smoking for men decreased, while that of diabetes mellitus for both sexes increased from 1981-1985 to 2001-2005.

**Conclusions** - The incidence of SCD decreased from 1981 to 1995 but unchanged from 1995 to 2005, which corresponded primarily to the trend for prevalence of hypertension. The continuous surveillance is necessary to clarify future trends for SCD in Japan, because of an increasing trend for diabetes mellitus.

## Article Summary

Article focus

The incidence rate of coronary heart disease among urban middle-aged Japanese men has increased from 1990s to 2000s, therefore the incidence of sudden cardiac death (SCD) for Japanese

1  
2  
3 individuals may have increased in recent decades.  
4

- 5  This is the first study to examine recent trends in SCD in Japan  
6  
7

8  
9  
10 Key messages

11  Age- and sex-adjusted incidence of SCD among men and women aged 30 to 84 years in four  
12 Japanese communities decreased from 1981-1985 to 1991-1995, and plateaued after 1996, which  
13 corresponded primarily to the trend for prevalence of hypertension  
14  
15

16  Continuous surveillance is necessary to clarify future trends for SCD in Japan, because of an  
17 increasing trend for diabetes mellitus.  
18  
19

20  
21  
22 The strength and limitation

23  We analyzed trends for SCD using population-based data from a large number of participants in  
24 a long-term observational study and conducted annual cardiovascular risk factor surveys ascertained  
25 the trends for predisposing risk factors of SCD.  
26  
27

28  We only examined the incidence of SCD for the age range of 30-84 years old, but not other  
29 ages.  
30  
31

32  Clinical features and neuroimaging reports were used to exclude death due to stroke, some  
33 cases may have been misclassified, especially in the case of an out-of-hospital death.  
34  
35  
36  
37  
38  
39  
40  
41  
42  
43  
44  
45  
46  
47  
48  
49  
50  
51  
52  
53  
54  
55  
56  
57  
58  
59  
60

1  
2  
3 In the United States, estimates of the annual number of sudden cardiac death (SCD) range from  
4  
5 184,000 to 400,000, accounting for almost half of all coronary heart disease (CHD) deaths [1-4]. The  
6  
7 incidence of SCD was 50% higher in men than women, and the age-adjusted annual incidence of SCD  
8  
9 per 100,000 person was 410.6 for men and 274.6 for women in 1998 among US residents aged  $\geq 35$   
10  
11 years [ 3]. Several population-based studies have reported on the incidence of SCD among Japanese  
12  
13 [5-8], however these studies are questionable due to methodological problems, such as small sample  
14  
15 size [7], a working population [8], and an inaccurate definition of SCD based on death certificate data  
16  
17 only [6]. Baba et al. reported from a sample from Suita City (census population: approximately  
18  
19 340,000) that in persons aged 20 to 74 years, the incidence of SCD was 31 (men = 45, women = 20) per  
20  
21 100,000 people. Information on SCD was determined using police records [5]. This suggests that the  
22  
23 incidence of SCD in Japan is about one-fifth of that in the United States [1,3,9].  
24  
25  
26

27  
28 SCD is generally considered to be caused by CHD. The CHD mortality rate in Japan has been  
29  
30 observed to be one-third to one-fifth of that in the United States [6,9,10]: this difference might explain  
31  
32 the difference in the incidence of SCD between Japan and the United States. However, Kitamura et al.  
33  
34 reported a significant increase in the incidence of CHD among middle-aged urban Japanese men from  
35  
36 1980-87 to 1996-2003 [11]. Therefore we expected that the incidence of SCD for Japanese individuals  
37  
38 may have increased in recent decades. So far, no epidemiological study has been reported which has  
39  
40 investigated trends in the incidence of SCD in a large population-based study.  
41  
42

43  
44 Therefore the purpose of this study was to examine trends in the incidence of SCD and its risk  
45  
46 factors in the Circulatory Risk in Communities Study (CIRCS), a longitudinal community-based study  
47  
48 of men and women.  
49  
50  
51  
52  
53  
54  
55  
56  
57  
58  
59  
60

## Methods

The CIRCS is a population-based study of cardiovascular risk factors, disease incidence, and their respective trends in Japanese communities. Details of the study design and procedures of CIRCS have been reported elsewhere [11-14]. Briefly, the subjects were Japanese men and women who lived in a north-eastern rural community, Ikawa, a south-western rural community, Noichi, a central rural community, Kyowa, and a south-western urban suburb, the Minami-Takayasu district of Yao. Annual cardiovascular risk surveys have been conducted since 1963 in the district of Yao City and Ikawa, since 1969 in Noichi and since 1981 in Kyowa by a joint research team from the Osaka Medical Center for Health Science and Promotion, the University of Tsukuba, and Osaka University. The census populations of ages 30 to 84 years in Ikawa were 3,983 in 1985, 4,166 in 1995, and 4,173 in 2000, while the corresponding totals were: 12,940, 14,170, and 14,825 in Yao; 8,149, 10,772, and 10,573 in Noichi; and 9,614, 9590, and 10,948 in Kyowa.

Informed consent was obtained from community representatives to conducting an epidemiological study based on guidelines established by the Council for International Organizations of Medical Science [15]. This study was approved by the Ethics Committee of the Osaka Medical Center for Health Science and Promotion.

We included in our study all SCD events that occurred among all residents between January 1, 1981 and December 31, 2005. The events of CHD and SCD were ascertained from national insurance claims, reports by local physicians, ambulance records, death certificates, reports by public health nurses and health volunteers, and annual cardiovascular risk surveys (Figure 1) [11-14]. Subjects who had moved out from the community or died were censored case. For confirmation of the diagnosis, we also obtained histories from next of kin and reviewed medical records in local hospitals.

The criteria for CHD were modified from those of the World Health Organization Expert Committee [16]. The indication for definite myocardial infarction (MI) was typical, severe chest pain (lasting at least 30 minutes and without definite non-ischemic cause) accompanied by new, abnormal,

1  
2  
3 and persistent Q or QS waves, consistent changes in cardiac enzyme levels, or both. If the  
4 electrocardiographic and enzyme levels were non-diagnostic or unavailable, but the patient suffered  
5 typical chest pain, a diagnosis of possible MI was made. For our study, definite and possible infarctions  
6 were combined into a single category, MI. These criteria are essentially the same as those of the  
7 WHO-MONICA project [17]. Angina pectoris was defined as repeated episodes of chest pain during  
8 effort, usually disappearing rapidly after the cessation of effort or upon use of sublingual nitroglycerin  
9 [12,13]. In the present study, CHD included definite or probable MI and angina pectoris.

10  
11  
12  
13  
14  
15  
16  
17  
18  
19 SCD was defined as sudden unexpected death either within 1 hour of symptom onset or within  
20 24 hours of having been observed alive and symptom-free. We excluded candidate cases if they  
21 survived for over 24 hours after symptom onset, or if there was another apparent cause of death, such  
22 as stroke, cancer, or accident. The final diagnosis of SCD was made by a panel of three or four trained  
23 physician-epidemiologists, blinded to the data of cardiovascular risk factors. We further classified the  
24 SCD cases into two groups according to the presence or absence of MI [18]. If the SCD case was  
25 accompanied with MI, it grouped SCD with MI (SCD\_MI), and others were grouped as SCD without  
26 MI (SCD\_NMI). In addition, SCD cases were divided into two groups stratified by time of symptom  
27 onset. If the time of symptom onset was within 1 hour, they were categorized as SCD1, and if it  
28 occurred within 24 hours but they were not SCD1, they were categorized as SCD1-24. Finally, SCD  
29 cases were divided into two groups based on place of death [3]. If the place of death was in emergency  
30 room (ER) or a hospital, the case was categorized as SCD\_ER, and if it was outside of a hospital, it was  
31 categorized as SCD\_NER (Table 1).

32  
33  
34  
35  
36  
37  
38  
39  
40  
41  
42  
43  
44  
45  
46  
47  
48  
49  
50  
51  
52  
53  
54  
55  
56  
57  
58  
59  
60  
Age- and sex-adjusted annual incidence of SCD was calculated from the number of new cases  
per 100,000 person-year during the periods, 1981 - 1985, 1986 - 1990, 1991 - 1995, 1996 - 2000, and  
2001 - 2005, in the aforementioned four Japanese communities. The rate of moving out from the  
community was 2.1%, 3.1%, 2.8%, 2.9% and 1.9%, respectively. In this study, all analyses were  
limited to men and women aged 30 to 84 years because the number of SCD cases aged <30 years was



1  
2  
3 too small (<1%), and for many cases aged  $\geq 85$  years their causes of death were difficult to be  
4  
5 identified.  
6

7  
8 Cardiovascular risk factors were ascertained from the participants of residents in risk factor  
9  
10 surveys during each of the five survey periods. They were recruited from all residents who were ages  
11  
12 30 to 84 years in four communities, and the surveys were conducted for the purpose of promoting  
13  
14 primary prevention of cardiovascular disease (CVD). The participation rate among the census  
15  
16 population in each survey period was 41.9%, 36.8%, 37.1%, 34.8%, and 32.0%, respectively. When the  
17  
18 subjects were restricted to ages 40 to 74 years, the respective participation rate was 57.2%, 48.2%,  
19  
20 44.2%, 40.1% and 35.4%. Farther, the participation rate for ages 40 to 74 years in Ikawa and Kyowa  
21  
22 (with high participation rates) was 73.9%, 62.7%, 61.1%, 57.3%, and 53.6%, respectively, while that in  
23  
24 Yao and Noichi (with lower participation rates) was 45.3%, 38.8%, 33.6%, 29.4%, and 26.1%,  
25  
26 respectively. If the subjects participated in the risk factor survey more than once during each survey  
27  
28 period, we used the data from the earliest year.  
29  
30  
31

32  
33 The items examined for the risk factor surveys included: medical history, measurement of total  
34  
35 cholesterol, blood pressure, body mass index (BMI), blood glucose, electrocardiogram (ECG) findings,  
36  
37 and drinking and smoking habits [11]. Hypertension was defined as a systolic blood pressure (BP)  $\geq$   
38  
39 140 mmHg, or a diastolic BP  $\geq$  90 mmHg, or use of an anti-hypertensive medication. Diabetes mellitus  
40  
41 was defined as a fasting glucose level  $\geq$  7.00 mmol/l, a nonfasting glucose level  $\geq$  11.10mmol/l, or use  
42  
43 of an antidiabetic medication. Overweight was defined as a BMI  $\geq$  25 kg/m<sup>2</sup>. The ECG data were  
44  
45 obtained with the subject in the supine position and were coded with the Minnesota Code, second  
46  
47 version [19], by trained physician-epidemiologists.  
48

49  
50 To calculate age- and sex-adjusted incidence, we employed the direct standardization method  
51  
52 using the age and sex distributions of the Japanese national model population from 1985 as standard  
53  
54 population. Linear trends in incidence were examined with the chi-square test. We calculated 95% CI  
55  
56 as following equation,  
57  
58  
59  
60

: age-adjusted annual incidence of SCD  $\pm$  1.96 square root

$$\left( \frac{\sum \left[ \frac{N_i^2 p_i (1 - p_i)}{n_i} \right]}{\left[ \sum N_i \right]^2} \right)$$

, where  $N$  is the standard population for 5-year age category  $i$ ,  $p$  is the crude incidence of the population for age category  $i$ ,  $n$  is the number of the population for age category  $i$ . Sex-specific age-adjusted means of risk factors were estimated by analysis of covariance, and age-adjusted prevalence by the direct method of standardization.

The significance of risk factor trends was examined for continuous variables by using the regression analysis for repeated measures [11], with the five periods represented as 1982.5, 1987.5, 1992.5, 1997.5 and 2002.5, and for discrete variables by using the chi-square test for trends. All statistical analyses were performed with the SAS System for Windows (Version 9.1, SAS Institute, Cary, NC).

## Results

In the present study, 471 individuals with SCD were identified over 25 years, consisting of 117 SCD\_MI and 354 SCD\_NMI, 163 SCD1 and 308 SCD1-24, 190 SCD\_NER, and 281 SCD\_ER. The number of SCD (in parenthesis, SCD\_MI) was presented according to the time of symptom onset and the place of death (Supplemental Table 1).

As shown in Table 1, age- and sex-adjusted incidence of SCD decreased from 1981-1985 to 1991-1995, however plateaued after 1996 ( $p$  for trend was  $p < 0.01$  from 1981-1985 to 1991-1995, and  $p = 0.73$  from 1991-1995 to 2001-2005). The annual incidence (95%CI) of SCD per 100,000 person-year during the five periods were 76.0 (44.8 to 107.2), 57.9 (32.7 to 83.1), 39.3 (20.3 to 58.3), 31.6 (15.6 to 47.6) and 36.8 (19.8 to 53.8), respectively. A total of 731 individuals with CHD were identified over 25 years: 256 with definite MI, 254 with probable MI, and 221 with angina pectoris, and the number of CHD deaths was 178 cases. The features of the SCD trends for the age groups 30-64,

65-74 and also 40-74 were similar to those of the overall trend, while there was a constant decline in the SCD incidence for age group 75-84..

A similar trend was observed for age- and sex-adjusted incidence of CHD; the annual incidence (95%CI) of CHD per 100,000 person-year was 98.2(62.7 to 133.7), 87.0(56.0 to 118.0), 78.0(50.9 to 105.1), 50.0(29.8 to 70.2) and 57.5(36.5 to 78.5), respectively. The corresponding annual incidence (95%CI) of MI per 100,000 person-year was 55.2(28.6 to 81.8), 58.9(33.4 to 84.4), 57.5(34.4 to 80.6), 34.6(17.9 to 51.3) and 45.6(26.9 to 64.3) (not shown in Table).

The incidence of SCD was two to three times higher for men than for women, while age- adjusted annual incidence (95%CI) of SCD per 100,000 person-year during the five time periods were 111.7(53.1 to 170.3), 82.1(36.0 to 128.2), 54.4(20.2 to 88.6), 49.3(18.6 to 80.0) and 57.9(26.2 to 89.6) for men and 50.6(17.1 to 84.1), 39.5(12.0 to 67.0), 27.1(6.3 to 47.9), 16.7(2.0 to 31.4) and 18.2(2.5 to 33.9) for women (Table 1).

We further analyzed the incidence of SCD stratified by the presence or absence of MI, the time of symptom onset and the place of death (Figure 2). The age- and sex-adjusted annual incidence (95%CI) of SCD per 100,000 person-year was 16.1(1.7 to 30.5), 15.5(2.4 to 28.6), 14.0,(2.7 to 25.3) 5.3(0 to 11.7) and 8.4(0.3 to 16.5) for SCD\_MI and 59.8(32.1 to 87.5), 42.4(20.8 to 64.0), 25.3(10.0 to 40.6), 26.4(11.7 to 41.1) and 28.4(13.4 to 43.4) for SCD\_NMI. The calculation of the incidence stratified by the time of symptom onset yielded age- and sex-adjusted annual incidence (95%CI) per 100,000 person-year of 27.4(8.6 to 46.2), 19.7(4.9 to 34.5), 12.7(1.9 to 23.5), 9.2(0.3 to 18.1) and 15.7(4.4 to 27.0) for SCD1, and 48.6(23.7 to 73.5), 38.1(17.7 to 58.5), 26.6(10.9 to 42.3), 22.5(9.1 to 35.9) and 21.1(8.4 to 33.8) for SCD1-24. The calculation of the incidence stratified by the place of death yielded the age- and sex-adjusted annual incidence (95%CI) per 100,000 person-year of 41.0(18.0 to 64.0), 25.1(8.5 to 41.7), 12.8(2.1 to 23.5), 11.4(1.9 to 20.9) and 10.5(1.7 to 19.3) for SCD\_NER, and 35.0(13.9 to 56.1), 32.7(13.7 to 51.7), 26.5(10.7 to 42.3), 20.2(7.3 to 33.1) and 26.2(11.6 to 40.8) for SCD\_ER. These trends showed similar features to those of the overall trend.

Moreover, we estimated the national SCD incidence in 2009 by using the results from this study. For this estimation, we multiplied the age- and sex-specific populations in 2009 by the age- and sex-specific incidences of SCD from 2001 to 2005. For the population aged 85 years or over, we used the incidence of SCD for ages 75 to 84 years. We predicted the number of cases of SCD in Japan to be at least 51,700 cases in 2009.

As shown in Table 2, the overall trends for risk factors of SCD showed the same features for men and women, except for diastolic BP, BMI, current smoking and heavy drinking. Mean diastolic BP for women decreased from 1981-1985 to 2001-2005 ( $p$  for trend was  $<0.01$ ), whereas that for men was constant from 1981-1985 to 1991-1995, but increased after 1996 ( $p$  for trend was  $<0.01$ ). For both men and women, mean systolic BP decreased from 1981-1985 to 2001-2005 ( $p$  for trend was  $<0.01$ ). The prevalence of hypertension decreased from 1981-1985 to 1991-1995, but plateaued after 1996 in both sexes. The mean BMI for women declined from 1981-1985 to 2001-2005 ( $p$  for trend was  $<0.01$ ), whereas BMI for men increased. The prevalence of both current smoking and heavy drinking decreased constantly from 1981-1985 to 2001-2005 ( $p$  for trend was  $<0.01$ , for both) for men, but did not change for women. Mean levels of total cholesterol, and the prevalence of diabetes mellitus increased continuously from 1981-1985 to 2001-2005 ( $p$  for trend was  $<0.01$ , respectively) for both sexes. The prevalence of left ventricular hypertrophy dramatically decreased from 1981-1985 to 2001-2005 ( $p$  for trend was  $<0.01$ , for both sexes). Additionally, we examined the risk factor trends for ages 40 to 74 years (Supplemental Table 2), and also stratified by community (Ikawa and Kyowa: Supplemental Table 3/ Yao and Noichi: Supplemental Table 4), and found the same trends.

## Discussion

In this longitudinal community-based study from 1981 to 2005, we found that the age- and sex-adjusted annual incidence of SCD decreased from 1981 to 1995, and plateaued thereafter. This trend was similarly observed when SCD was stratified by the presence of MI, in which MI constituted

1  
2  
3 approximately 20 to 35% of all SCD, the time of symptom onset, in which SCD within 1 hour  
4  
5 constituted approximately 30% to 45% of all SCD, and the place of death, in which SCD in emergency  
6  
7 room or hospital constituted approximately 45% to 70% of all SCD. Although the incidence of SCD  
8  
9 was higher for men than for women consistent with previous reports [3,20], trends for the incidence of  
10  
11 SCD did not vary according to age or sex. Since Japan is a rapidly aging country, the number of SCD  
12  
13 in Japan, although much lower than in the United States [3], may increase in the future due to an  
14  
15 increased elderly population.  
16  
17

18  
19 Several population-based studies have previously reported the incidence of SCD among Japanese.  
20  
21 The Hisayama study reported that the age-adjusted annual incidence rate of SCD between 1988 and  
22  
23 2000 was 76 per 100,000 person-years for men and 19 per 100,000 person-years for women aged 40  
24  
25 and over, and that the incidence rate did not change during the study period. However, the size of this  
26  
27 population sample was 1,110 for men and 1,527 for women, which made it difficult to evaluate trends  
28  
29 in the incidence of SCD [7]. Baba et al. reported that the annual SCD incidence was 45 per  
30  
31 100,000 persons for men and 20 per 100,000 persons for women for subjects aged 20 to 74 years in  
32  
33 Suita City in 1992 [5]. Our study showed similar age-adjusted annual incidence of SCD (57.9 per  
34  
35 100,000 person-year for men and 18.2 per 100,000 person-year for women aged 30 to 84 years) in  
36  
37 2001-2005.  
38  
39

40  
41 In Western countries, SCD accounts for almost half of all CHD deaths [2,21], while CHD  
42  
43 accounted for at least 80% of all SCD cases [22]. In the present study, SCD accounts for 10% of all  
44  
45 CHD deaths, while CHD accounted for 25% of all SCD cases which was generally consistent with the  
46  
47 finding from a previous Japanese population-based study [20]. The lower incidence [11] and mortality  
48  
49 [9,10,23] from CHD in Japan than in the United States probably correspond to the lower incidence of  
50  
51 SCD in Japanese.  
52

53  
54 Several population-based studies have reported the age-adjusted annual incidence of MI among  
55  
56 Japanese men and women [24-26]: 42.3 per 100,000 person for ages 20 years and more in 1988-1998  
57  
58  
59  
60

[24], 45.8 per 100,000 population for ages 35 to 64 years in 1994-1996 [25], and 49.7 per 100,000 person for ages 20 years and more in 1996-1998 [26]. In the present study, the age-adjusted annual incidence of MI for ages 30 to 84 years was 34.6 to 58.9 per 100,000 person-year in 1981-2005. These findings confirm the low incidence of CHD in Japan. However, Rumana et al. reported that the incidence of acute MI increased from 1990-92 to 1999-2001 in the Takashima AMI Registry [26]. Furthermore, Kitamura et al. reported a significant increase in the incidence of CHD from 1980-87 to 1996-2003 for middle-aged men in an urban community [11], which was involved in this CIRCS. Because the prevalence of overweight and diabetes mellitus increased during the last two decades as seen in our study and other Japanese studies [9,11,27], the incidence of SCD might increase in the future.

We found in the data presented here that the incidence of SCD\_ER decreased from 1981 to 1995, but plateaued after 1996, whereas the incidence of SCD\_NER has decreased steadily over time. The plateauing trend of SCD\_ER may be due to the doubling of the number of patients transported to emergency rooms by ambulance between 1996 and 2006 [28].

Risk factors for SCD among Americans have been identified as hypertension, hypertensive organic change, elderly age, male sex, smoking, heavy drinking, overweight, diabetes and left ventricular hypertrophy [3]. Hypertension, current smoking, and diabetes mellitus were found the potential risk factors for SCD among Japanese [20,29]. In the present study, the SCD incidence decreased from 1981 to 1995, which correspond to a reduction in the prevalence of hypertension and current smoking. The plateaued trend for SCD incidence from 1996 to 2005 is explained partly by the unchanged prevalence of hypertension, the decreased prevalence of current smoking and the increased prevalence of diabetes mellitus.

The strength of the present study is that we analyzed trends for SCD using population-based data, including both urban and rural areas, from a large number of participants in a long-term observational study. The cause of death from death certificates was validated by medical records and/or information

1  
2  
3 from next of kin. In addition, annual cardiovascular risk factor surveys ascertained the trends for  
4  
5 predisposing risk factors of SCD.  
6

7  
8 Nonetheless, our study has a few limitations. First, we only examined the incidence of SCD for  
9  
10 the age range of 30 to 84 years old. However the frequency of SCD among persons < 30 years old was  
11  
12 less than 1 % even in the United States [3], so this age window is unlikely to substantially affect the  
13  
14 results. Second, although clinical features and neuroimaging reports were used to exclude death due to  
15  
16 stroke, some cases may have been misclassified, especially in the case of an out-of-hospital death. Such  
17  
18 misclassification may well have affected the changes in the incidence of SCD occurred out-of-hospital.  
19

20  
21 In conclusion, age- and sex-adjusted incidence of SCD for a general Japanese population  
22  
23 decreased from 1981-1985 to 1991-1995, and plateaued after 1996, which corresponded primarily to  
24  
25 the trend for the prevalence of hypertension. The plateaued trend for SCD incidence from 1996 to 2005  
26  
27 may be in part due to the unchanged prevalence of hypertension, the decreased prevalence of smoking,  
28  
29 and the increased prevalence of diabetes mellitus. The continuous surveillance is necessary to clarify  
30  
31 future trends for SCD in Japan, because of an increasing trend for diabetes mellitus.  
32  
33  
34  
35  
36  
37  
38  
39  
40  
41  
42  
43  
44  
45  
46  
47  
48  
49  
50  
51  
52  
53  
54  
55  
56  
57  
58  
59  
60

Table 1. Trends for age- and sex- adjusted incidence of sudden cardiac death per 100,000 person-year and 95% CI among men and women aged 30 to 84 years in four Japanese communities from 1981 to 2005.

|                                                                             | 1981-1985        | 1986-1990        | 1991-1995       | 1996-2000       | 2001-2005       | p for trend |
|-----------------------------------------------------------------------------|------------------|------------------|-----------------|-----------------|-----------------|-------------|
| <b>Total</b>                                                                |                  |                  |                 |                 |                 |             |
| No of populations                                                           | 31754            | 34686            | 36717           | 38698           | 40519           |             |
| No of cases                                                                 | 114              | 101              | 83              | 76              | 97              |             |
| Age- and sex-adjusted incidence<br>( Incidence/100,000 person-year)         | 76.0             | 57.9             | 39.3            | 31.6            | 36.8            | < 0.01      |
| 95% CI                                                                      | (44.8 to 107.2)  | (32.7 to 83.1)   | (20.3 to 58.3)  | (15.6 to 47.6)  | (19.8 to 53.8)  |             |
| <b>Age- and sex-adjusted incidence<br/>( Incidence/100,000 person-year)</b> |                  |                  |                 |                 |                 |             |
| 30-64 y                                                                     | 24.1             | 19.7             | 15.7            | 12.4            | 17.0            | 0.266       |
| 95% CI                                                                      | (4.8 to 43.4)    | (3.3 to 36.1)    | (1.8 to 29.6)   | (0.7 to 24.1)   | (2.5 to 31.5)   |             |
| 65-74 y                                                                     | 217.1            | 100.2            | 99.7            | 83.8            | 101.8           | < 0.01      |
| 95% CI                                                                      | (64.9 to 369.3)  | (1.7 to 198.7)   | (8.6 to 190.8)  | (8.9 to 158.7)  | (24.1 to 179.5) |             |
| 75-84 y                                                                     | 541.0            | 527.2            | 258.5           | 204.3           | 190.8           | < 0.01      |
| 95% CI                                                                      | (187.9 to 894.1) | (210.6 to 843.8) | (67.2 to 449.8) | (39.5 to 369.1) | (51.1 to 330.5) |             |
| 40-74 y                                                                     | 65.0             | 40.0             | 34.6            | 28.8            | 33.4            | < 0.01      |
| 95% CI                                                                      | (29.9 to 100.1)  | (14.1 to 65.9)   | (12.2 to 57.0)  | (10.0 to 47.6)  | (13.5 to 53.3)  |             |
| <b>Men</b>                                                                  |                  |                  |                 |                 |                 |             |
| No of populations                                                           | 15048            | 16471            | 17421           | 18422           | 19306           |             |
| No of cases                                                                 | 70               | 61               | 49              | 50              | 67              |             |
| Age-adjusted incidence<br>( Incidence/100,000 person-year)                  | 111.7            | 82.1             | 54.4            | 49.3            | 57.9            | < 0.01      |
| 95% CI                                                                      | (53.1 to 170.3)  | (36.0 to 128.2)  | (20.2 to 88.6)  | (18.6 to 80.0)  | (26.2 to 89.6)  |             |
| <b>Women</b>                                                                |                  |                  |                 |                 |                 |             |
| No of populations                                                           | 16706            | 18215            | 19296           | 20276           | 21213           |             |
| No of cases                                                                 | 44               | 40               | 34              | 26              | 30              |             |
| Age-adjusted incidence<br>( Incidence/100,000 person-year)                  | 50.6             | 39.5             | 27.1            | 16.7            | 18.2            | < 0.01      |
| 95% CI                                                                      | (17.1 to 84.1)   | (12.0 to 67.0)   | (6.3 to 47.9)   | (2.0 to 31.4)   | (2.5 to 33.9)   |             |



Table 2. Trends for age- and sex-adjusted cardiovascular risk characteristics among men and women aged 30 to 84 years in four Japanese communities from 1981 to 2005.

|                                         | 1981-1985 | 1986-1990 | 1991-1995 | 1996-2000 | 2001-2005 | p for trend |
|-----------------------------------------|-----------|-----------|-----------|-----------|-----------|-------------|
| Age-adjusted, mean or percent           |           |           |           |           |           |             |
| Men                                     |           |           |           |           |           |             |
| Number                                  | 5350      | 4992      | 5175      | 5039      | 4900      |             |
| Age, year                               | 55        | 56        | 58        | 59        | 60        |             |
| Systolic blood pressure, mmHg           | 137       | 134       | 133       | 134       | 133       | <0.01       |
| Diastolic blood pressure, mmHg          | 81        | 81        | 81        | 82        | 82        | <0.01       |
| Antihypertensive medication, %          | 19.8      | 18.6      | 17.2      | 18.0      | 20.1      | 0.550       |
| Hypertension, %                         | 49.2      | 44.1      | 41.3      | 44.7      | 44.6      | <0.01       |
| Body mass index, kg/m <sup>2</sup>      | 22.7      | 22.9      | 23.3      | 23.5      | 23.8      | <0.01       |
| Overweight (BMI ≥25kg/m <sup>2</sup> )  | 26.2      | 29.2      | 29.6      | 33.5      | 34.7      | <0.01       |
| Total cholesterol, mmol/L               | 4.75      | 4.89      | 4.98      | 5.13      | 5.23      | <0.01       |
| Total cholesterol ≥5.69 mmol/L, %       | 14.0      | 17.7      | 20.7      | 26.8      | 31.4      | <0.01       |
| Blood glucose, mmol/L                   | 63.0      | 69.7      | 67.7      | 63.0      | 61.1      | <0.01       |
| Diabetes mellitus, %                    | 3.8       | 6.4       | 7.1       | 7.7       | 9.7       | <0.01       |
| Heavy drinking(ethanol intake ≥46g/day) | 33.6      | 29.9      | 18.6      | 17.5      | 22.9      | <0.01       |
| Current smoking, %                      | 60.1      | 55.8      | 52.6      | 49.5      | 44.6      | <0.01       |
| ECG findings, %                         |           |           |           |           |           |             |
| Atrial fibrillation                     | 1.4       | 1.6       | 1.4       | 1.5       | 1.4       | 0.731       |
| Ventricular premature contraction       | 3.1       | 3.0       | 3.2       | 2.7       | 2.5       | 0.039       |
| Supraventricular premature contraction  | 3.3       | 4.4       | 4.1       | 3.6       | 3.5       | 0.547       |
| Major ST-T abnormality                  | 4.6       | 4.1       | 3.7       | 4.2       | 3.9       | 0.109       |
| Minor ST-T abnormality                  | 12.5      | 10.1      | 12.7      | 11.9      | 11.7      | 0.871       |
| PQ prolonged                            | 1.5       | 1.2       | 1.5       | 1.4       | 1.2       | 0.298       |
| Complete/incomplete right bundle        | 5.3       | 5.2       | 5.7       | 6.1       | 6.7       | <0.01       |
| Wide QRS                                | 3.0       | 3.0       | 3.2       | 3.6       | 4.1       | <0.01       |
| Abnormal Q wave                         | 0.5       | 0.7       | 0.6       | 0.7       | 0.7       | 0.431       |
| Left ventricular hypertrophy            | 29.1      | 27.5      | 22.5      | 19.2      | 17.3      | <0.01       |
| Women                                   |           |           |           |           |           |             |
| Number                                  | 7949      | 7781      | 8463      | 8436      | 8082      |             |
| Age, year                               | 54        | 55        | 56        | 57        | 58        |             |
| Systolic blood pressure, mmHg           | 134       | 132       | 130       | 130       | 128       | <0.01       |
| Diastolic blood pressure, mmHg          | 79        | 78        | 78        | 78        | 77        | <0.01       |
| Antihypertensive medication, %          | 19.2      | 18.4      | 16.8      | 17.0      | 18.1      | <0.01       |
| Hypertension, %                         | 42.0      | 37.1      | 34.0      | 34.9      | 33.6      | <0.01       |
| Body mass index, kg/m <sup>2</sup>      | 23.5      | 23.4      | 23.3      | 23.3      | 23.2      | <0.01       |
| Overweight (BMI ≥25kg/m <sup>2</sup> )  | 34.4      | 33.4      | 31.1      | 30.9      | 28.0      | <0.01       |
| Total cholesterol, mg/dl                | 5.09      | 5.24      | 5.27      | 5.44      | 5.49      | <0.01       |
| Total cholesterol ≥5.69 mmol/L, %       | 24.7      | 29.3      | 31.1      | 39.7      | 44.7      | <0.01       |
| Blood glucose, mmol/L                   | 58.3      | 65.2      | 62.6      | 57.2      | 56.5      | <0.01       |
| Diabetes mellitus, %                    | 2.1       | 3.5       | 3.3       | 3.9       | 4.4       | <0.01       |
| Heavy drinking(ethanol intake ≥46g/day) | 0.5       | 0.3       | 0.3       | 0.3       | 0.6       | 0.685       |
| Current smoking, %                      | 6.3       | 5.8       | 5.7       | 6.6       | 7.1       | <0.01       |
| ECG findings, %                         |           |           |           |           |           |             |
| Atrial fibrillation                     | 0.6       | 0.6       | 0.3       | 0.4       | 0.4       | <0.01       |
| Ventricular premature contraction       | 2.0       | 2.3       | 1.8       | 2.0       | 2.3       | 0.825       |
| Supraventricular premature contraction  | 2.5       | 2.7       | 3.0       | 2.8       | 2.9       | 0.316       |
| Major ST-T abnormality                  | 6.5       | 6.0       | 5.0       | 4.5       | 4.8       | <0.01       |
| Minor ST-T abnormality                  | 21.9      | 18.6      | 19.8      | 19.5      | 17.5      | <0.01       |
| PQ prolonged                            | 0.6       | 0.5       | 0.5       | 0.5       | 0.4       | 0.212       |
| Complete/incomplete right bundle        | 3.5       | 3.4       | 3.2       | 3.3       | 3.2       | 0.099       |
| Wide QRS                                | 1.5       | 1.6       | 1.7       | 1.6       | 1.6       | 0.751       |
| Abnormal Q wave                         | 0.2       | 0.2       | 0.2       | 0.2       | 0.4       | 0.015       |
| Left ventricular hypertrophy            | 11.1      | 9.6       | 7.8       | 6.0       | 4.9       | <0.01       |

**Acknowledgment**

The authors thank the other investigators, the staff, and the participants of the CIRCS for their valuable contributions. We acknowledge Drs Hiromichi Kimura, Sachiko Masuda, and Toshihiko Yamada, The University of Tokyo and Dr Koji Tachikawa, University of Nagoya for their valuable comments on the manuscript.

**Data Sharing**

None

**Disclosures**

None declared.

**Funding**

This work was supported in part by grant from the Japanese Ministry of Education, Culture, Sports, Science and Technology (Grant-in-Aid for research C: 21590731).

**Competing Interests**

None

**Contributorship**

CIRCS Study Collaborators

The Circulatory Risk in Communities Study (CIRCS) is a collaborative study managed by the Osaka Medical Center for Health Science and Promotion, University of Tsukuba, Osaka University and Ehime University. The CIRCS investigators who contributed to this study are as follows: Masamitsu

1  
2  
3 Konishi, Yoshinori Ishikawa, Akihiko Kitamura, Masahiko Kiyama, Takeo Okada, Kenji Maeda,  
4  
5 Masakazu Nakamura MD, Masatoshi Ido, Masakazu Nakamura PhD, Takashi Shimamoto, Minoru  
6  
7 Iida and Yoshio Komachi, Osaka Medical Center for Health Science and Promotion, Osaka; Yoshihiko  
8  
9 Naito, Mukogawa Women's University, Nishinomiya; Tomonori Okamura, National Cardiovascular  
10  
11 Center, Suita; Shinichi Sato, Chiba Prefectural Institute of Public Health, Chiba; Tomoko Sankai,  
12  
13 Kazumasa Yamagishi, Kyoko Kirii, Mitsumasa Umesawa, ChoyLye Chei, Kimiko Yokota and Minako  
14  
15 Tabata, University of Tsukuba, Tsukuba; Hiroyasu Iso, Tetsuya Ohira, Renzhe Cui, Hironori Imano, Ai  
16  
17 Ikeda , Satoyo Ikehara, Isao Muraki and Minako Maruyama, Osaka University, Suita; Takeshi  
18  
19 Tanigawa, Isao Saito, Katsutoshi Okada and Susumu Sakurai, Ehime University, Toon; Masayuki Yao,  
20  
21 Ranryoen Hospital, Ibaraki; and Hiroyuki Noda, Osaka University Hospital, Suita.  
22  
23  
24  
25  
26  
27

## 28 Reference list

- 29  
30 1. Chugh SS, Jui J, Gunson K, Stecker EC, et al. Current burden of sudden cardiac death: Multiple  
31  
32 source surveillance versus retrospective death certificate-based review in a Large U.S. Community.  
33  
34 *J Am Coll Cardiol.* 2004; 44:1268-1275.  
35
- 36  
37 2. Myerburg RJ, Kessler KM, Castellanos A. Sudden cardiac death: epidemiology, transient risk, and  
38  
39 intervention assessment. *Ann Intern Med.* 1993;119:1187-1197.  
40
- 41  
42 3. Zheng ZJ, Croft JB, Giles WH, et al. Sudden cardiac death in the United States, 1989 to 1998.  
43  
44 *Circulation.* 2001;104:2158-63.  
45
- 46  
47 4. Adabag, AS. Lueqker, RV. Roger, VL. Gersh, BJ. Sudden cardiac death: epidemiology and risk  
48  
49 factors. *Nat. Rev. Cardiol.* 2010; 7: 216-25.  
50
- 51  
52 5. Baba S, Konishi M, Asano G, et al. Survey of Sudden cardiac death for the complete medical recode  
53  
54 in a large city – consider the frequency and underlying and background factor in Japanese. *JACD.*  
55  
56 1996; 31:100-6.  
57
- 58  
59 6. Toyoshima H, Hayashi S, Tanabe N, et al. Estimation of the proportional rate of ischemic heart  
60

- disease in sudden death from death certificate and registration surveys in Niigata prefecture in Japanese. *JACD*. 1996; 31:93-9.
7. Kubo M, Kiyohara Y, Kato I, et al. Trends in the incidence, mortality, and survival rate of cardiovascular disease in a Japanese community: The Hisayama Study. *Stroke*. 2003; 34:2349-54.
8. Kawamura T, Kondo H, Hirai M, et al. Sudden death in the working population. A collaborative study in central Japan. *Eur Heart J*. 1999; 20:338-43.
9. Iso H. Changes in coronary heart disease risk among Japanese. *Circulation*. 2008; 118:2725-29.
10. Baba S, Ozawa H, Sakai Y, et al. Heart disease deaths in a Japanese urban area evaluated by clinical and police records. *Circulation*. 1994; 89:109-15.
11. Kitamura A, Sato S, Kiyama M, et al. Trends in the incidence of coronary heart disease and stroke and their risk factors in Japan, 1964 to 2003. The Akita-Osaka Study. *JACC*. 2008; 52:71-9.
12. Shimamoto T, Komachi Y, Inaba H, et al. Trends for coronary heart disease and stroke and their risk factors in Japan. *Circulation* 1989;79:503-15.
13. Kitamura A, Iso H, Iida M, et al. Trends in the incidence of coronary heart disease and stroke and the prevalence of cardiovascular risk factors among Japanese men from 1963 to 1994. *Am J Med* 2002;112:104-9.
14. Imano H, Kitamura A, Sato S, et al. Trends for blood pressure and its contribution to stroke incidence in the middle-aged Japanese population. The Circulatory Risk in Communities Study (CIRCS). *Stroke* 2009;40:1571-77.
15. International guidelines for ethical review of epidemiological studies. *Law Med Health Care*. 1991;19:247-58.
16. WHO Expert Committee: Arterial Hypertension and Ischemic Heart Disease, Preventive Aspects. Geneva, WHO Technical Report Series No231, 1962.
17. Tunstall-Pedoe H, Kuulasmaa K, Amouyel P, et al. Myocardial infarction and coronary deaths in the World Health Organization MONICA Project. Registration Procedures, event rates, and

- 1  
2  
3 case-fatality rates in 38 populations from 21 countries in four continents.  
4  
5  
6 *Circulation* 1994;90:583-612.  
7
- 8 18. Kannel WB, Wilson PWF, D'Agostino RB, Cobb J. Sudden coronary death in women. *Am Heart*  
9  
10 *J.* 1998; 136:205-12.  
11
- 12 19. De Bacquer D, De Backer G, Kornitzer M, et al. Prognostic value of ECG findings for total,  
13  
14 cardiovascular disease, and coronary heart disease death in men and women. *Heart.*  
15  
16 1998;80:570-77.  
17
- 18 20. Tanabe N, Toyoshima H, Hayashi S, et al. Epidemiology of sudden death in Japan. *Jpn J*  
19  
20 *Electrocardiology.* 2006; 26:111-17. (in Japanese)  
21  
22
- 23 21. Fox CS, Evans JC, Larson MG, et al. Temporal trends in coronary heart disease mortality and  
24  
25 sudden cardiac death from 1950 to 1999: The Framingham Heart Study. *Circulation.* 2004;  
26  
27 110:522-27.  
28
- 29 22. Myerburg, RJ. Sudden Cardiac Death: Exploring the Limits of Our Knowledge. *J Cardiovasc*  
30  
31 *Electrophysiol.* 2001; 12:369-81.  
32  
33
- 34 23. Saito I, Folsom AR, Aono H, et al. Comparison of fatal coronary heart disease occurrence based on  
35  
36 population surveys in Japan and the USA. *Int J Epidemiol.* 2000; 29:837-44.  
37  
38
- 39 24. Yoshida M, Yoshikuni K, Nakamura Y, et al. Incidence of acute myocardial infarction in  
40  
41 Takashima, Shiga, Japan. *Circ J* 2005;69:404-08.  
42
- 43 25. Tanabe N, Saito R, Sato T, et al. Event rates of acute myocardial infarction and coronary death in  
44  
45 Niigata and Nagaoka Cities in Japan. *Circ J* 2003;67:40-5.  
46  
47
- 48 26. Rumana N, Kita Y, Turin TC, et al. Trend of increase in the incidence of acute myocardial  
49  
50 infarction in a Japanese population. Takashima AMI registry, 1990-2001. *Am J Epidemiol.* 2008;  
51  
52 167:1358-64.  
53
- 54 27. Islam MM, Horibe H, Kobayashi F. Current trend in prevalence of diabetes mellitus in Japan,  
55  
56 1964-1992. *J Epidemiol.* 1999;9:155-62.  
57  
58  
59  
60

1  
2  
3 28. Fire and Disaster management agency: Current state of emergency rescue in Japan 2006.

4  
5 (http:// www.mhlw.go.jp/shingi/2008/07/dl/s0717-7c.pdf) (Accessed 17 July 2009)

6  
7 29. Ohira T, Kinuta M, Imano H, et al. Risk Factors for Sudden Cardiac Death among Japanese: The

8  
9 Circulatory Risk in Communities Study (CIRCS)[abstract]. American Heart Association 50th

10  
11 Annual Conference on Cardiovascular Disease Epidemiology and Prevention. 2010:P214.

### 12 13 14 15 16 17 **Author's individual contributions**

18 Minako Maruyama analysed and interpreted the data, drafted the manuscript, and provided statistical  
19 expertise. Akihiko Kitamura, Masahiko Kiyama, Takeo Okada, Kenji Maeda, Yoshinori Ishikawa and  
20 Takashi Shimamoto acquired the data and critically revised the manuscript. Tetsuya Ohira, Hironori  
21 Imano, Hiroyuki Noda, Kazumasa Yamagishi and Hiroyasu Iso conceived and designed the study,  
22 acquired and interpreted the data, and critically revised the manuscript.  
23  
24  
25  
26  
27  
28  
29  
30

### 31 32 **Appendix**

#### 33 34 CIRCS Study Collaborators

35  
36 The Circulatory Risk in Communities Study (CIRCS) is a collaborative study managed by the Osaka  
37 Medical Center for Health Science and Promotion, University of Tsukuba, Osaka University and  
38 Ehime University. The CIRCS investigators who contributed to this study are as follows: Masamitsu  
39 Konishi, Yoshinori Ishikawa, Akihiko Kitamura, Masahiko Kiyama, Takeo Okada, Kenji Maeda,  
40 Masakazu Nakamura MD, Masatoshi Ido, Masakazu Nakamura PhD, Takashi Shimamoto, Minoru  
41 Iida and Yoshio Komachi, Osaka Medical Center for Health Science and Promotion, Osaka; Yoshihiko  
42 Naito, Mukogawa Women's University, Nishinomiya; Tomonori Okamura, National Cardiovascular  
43 Center, Suita; Shinichi Sato, Chiba Prefectural Institute of Public Health, Chiba; Tomoko Sankai,  
44 Kazumasa Yamagishi, Kyoko Kirii, Mitsumasa Umesawa, ChoyLye Chei, Kimiko Yokota and Minako  
45 Tabata, University of Tsukuba, Tsukuba; Hiroyasu Iso, Tetsuya Ohira, Renzhe Cui, Hironori Imano, Ai  
46  
47  
48  
49  
50  
51  
52  
53  
54  
55  
56  
57  
58  
59  
60

Ikeda , Satoyo Ikehara, Isao Muraki and Minako Maruyama, Osaka University, Suita; Takeshi  
Tanigawa, Isao Saito, Katsutoshi Okada and Susumu Sakurai, Ehime University, Toon; Masayuki Yao,  
Ranryoen Hospital, Ibaraki; and Hiroyuki Noda, Osaka University Hospital, Suita.

For peer review only

1  
2  
3  
4  
5  
6  
7  
8  
9  
10  
11  
12  
13  
14  
15  
16  
17  
18  
19  
20  
21  
22  
23  
24  
25  
26  
27  
28  
29  
30  
31  
32  
33  
34  
35  
36  
37  
38  
39  
40  
41  
42  
43  
44  
45  
46  
47  
48  
49  
50  
51  
52  
53  
54  
55  
56  
57  
58  
59  
60

**Figure Legends**

Figure 1. Determination of sudden cardiac death (SCD)

Figure 2. Trends for age- and sex-adjusted annual incidence of sudden cardiac death, stratified by the presence or absence of myocardial infarction (MI), the time of symptom onset and the place of death. Annual incidence per 100,000 person among men and women aged 30-84 in four Japanese communities from 1981 to 2005, CIRCSC. SCD with MI (SCD\_MI) and SCD without MI (SCD\_NMI), SCD within 1 hour (SCD1) and SCD between 1 and 24 hours (SCD1-24). SCD in emergency room or a hospital (SCD\_ER) and SCD outside of a hospital (SCD\_NER).

For peer review only



**Figure 1**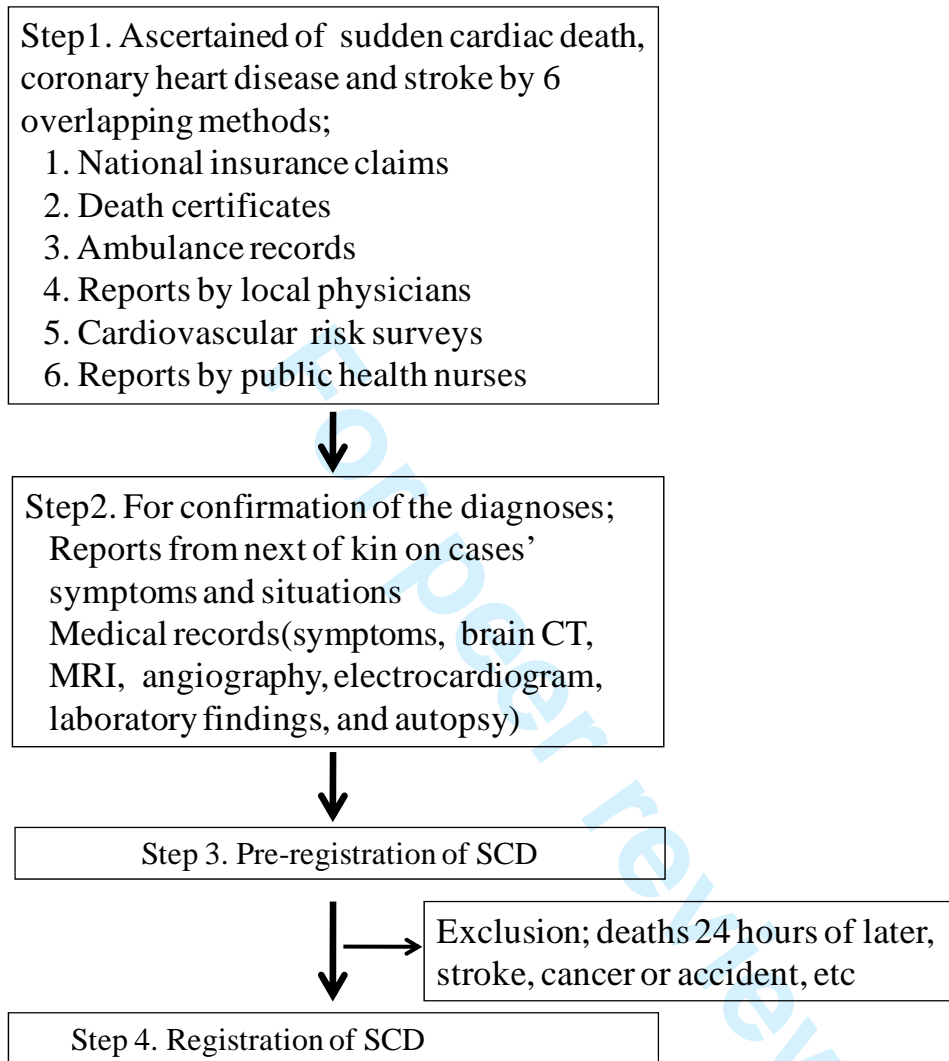

Figure 2

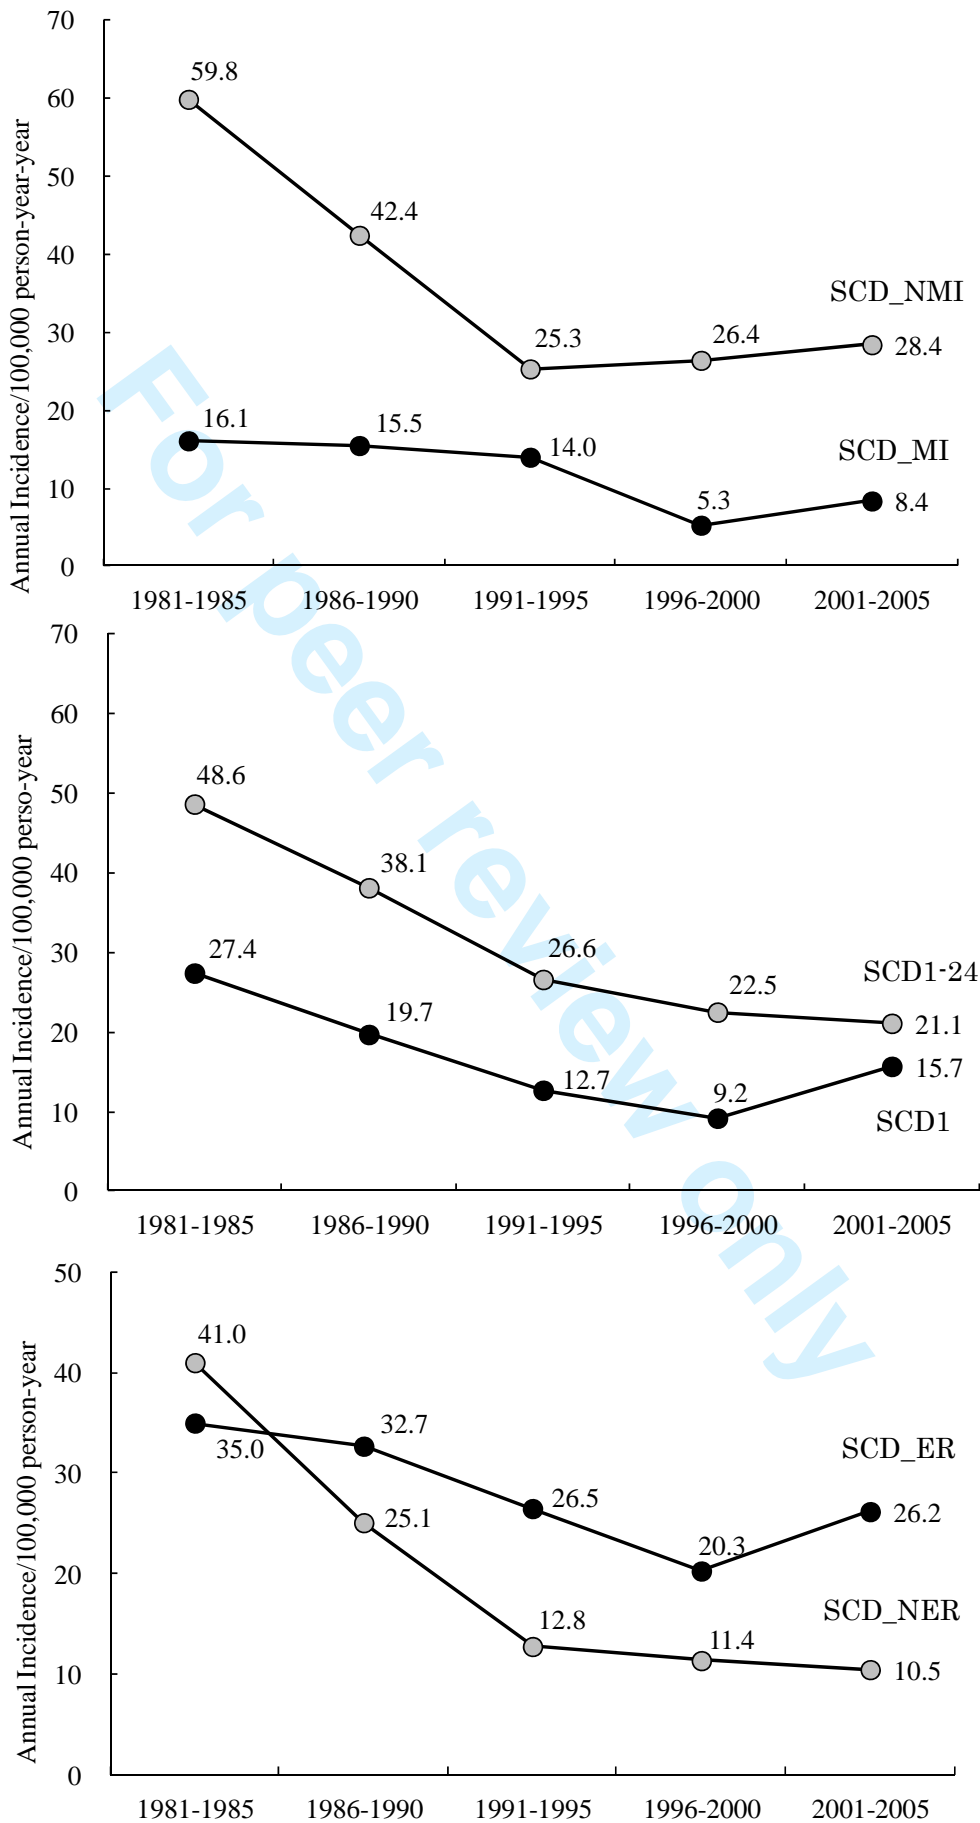

Supplemental Table 1. The Number of Sudden Cardiac Death (SCD) according to the Time of Symptom Onset and the Place of Death.

| Place of death                       | Time of symptom onset |                       | Total    |
|--------------------------------------|-----------------------|-----------------------|----------|
|                                      | < 1 hour<br>SCD1      | 1-24 hours<br>SCD1-24 |          |
| Outside of hospital<br>SCD_NER       | 58(4)                 | 132(19)               | 190(23)  |
| Emergency room or hospital<br>SCD_ER | 105(14)               | 176(80)               | 281(94)  |
| Total                                | 163(18)               | 308(99)               | 471(117) |

In parentheses, the number of SCD with myocardial infarction (SCD\_MI)

Supplemental Table 2. Trends for age- and sex-adjusted cardiovascular risk characteristics among men and women aged 40 to 74 years in four Japanese communities from 1981 to 2005.

|                                               | 1981-1985 | 1986-1990 | 1991-1995 | 1996-2000 | 2001-2005 | <i>p</i> for trend |
|-----------------------------------------------|-----------|-----------|-----------|-----------|-----------|--------------------|
| Age-adjusted, mean or percent                 |           |           |           |           |           |                    |
| Men                                           |           |           |           |           |           |                    |
| Number                                        | 4678      | 4315      | 4408      | 4281      | 4038      |                    |
| Age, year                                     | 55        | 56        | 57        | 59        | 60        |                    |
| Systolic blood pressure, mmHg                 | 137       | 134       | 133       | 135       | 133       | <0.01              |
| Diastolic blood pressure, mmHg                | 82        | 82        | 81        | 83        | 83        | <0.01              |
| Antihypertensive medication, %                | 19.7      | 18.6      | 17.1      | 18.0      | 19.2      | 0.322              |
| Hypertension, %                               | 50.2      | 41.6      | 41.6      | 45.3      | 45.1      | <0.01              |
| Body mass index, kg/m <sup>2</sup>            | 22.8      | 23.0      | 23.3      | 23.6      | 24.0      | <0.01              |
| Overweight (BMI ≥25kg/m <sup>2</sup> )        | 26.5      | 29.4      | 30.3      | 34.1      | 35.8      | <0.01              |
| Total cholesterol, mmol/L                     | 4.76      | 4.90      | 4.99      | 5.15      | 5.27      | <0.01              |
| Total cholesterol ≥5.69 mmol/L, %             | 14.1      | 17.9      | 21.2      | 27.5      | 32.7      | <0.01              |
| Blood glucose, mmol/L                         | 61.9      | 69.6      | 68.0      | 63.8      | 62.3      | <0.01              |
| Diabetes mellitus, %                          | 4.8       | 7.1       | 7.3       | 7.7       | 9.8       | <0.01              |
| Heavy drinking(ethanol intake ≥46g/day)       | 33.7      | 30.3      | 19.2      | 18.7      | 24.9      | <0.01              |
| Current smoking, %                            | 61.0      | 56.3      | 52.4      | 49.9      | 44.6      | <0.01              |
| ECG findings                                  |           |           |           |           |           |                    |
| Atrial fibrillation                           | 1.3       | 1.5       | 1.1       | 1.3       | 1.3       | 0.639              |
| Ventricular premature contraction             | 3.0       | 2.8       | 2.9       | 2.5       | 2.1       | 0.013              |
| Supraventricular premature contraction        | 2.8       | 3.7       | 3.6       | 3.0       | 2.8       | 0.535              |
| Major ST-T abnormality                        | 4.5       | 4.0       | 3.7       | 4.0       | 3.9       | <0.01              |
| Minor ST-T abnormality                        | 12.5      | 9.9       | 12.5      | 11.8      | 11.6      | <0.01              |
| PQ prolonged                                  | 1.4       | 1.1       | 1.3       | 1.4       | 1.0       | 0.465              |
| Complete/incomplete right bundle branch block | 5.3       | 5.0       | 5.1       | 5.6       | 6.1       | 0.449              |
| Wide QRS                                      | 2.9       | 2.8       | 2.8       | 3.2       | 3.5       | 0.075              |
| Abnormal Q wave                               | 0.4       | 0.6       | 0.5       | 0.6       | 0.7       | 0.307              |
| Left ventricular hypertrophy                  | 29.3      | 27.6      | 23.3      | 19.5      | 17.5      | <0.01              |
| Women                                         |           |           |           |           |           |                    |
| Number                                        | 6954      | 6766      | 7131      | 7041      | 6524      |                    |
| Age, year                                     | 55        | 56        | 56        | 57        | 58        |                    |
| Systolic blood pressure, mmHg                 | 135       | 132       | 130       | 131       | 129       | <0.01              |
| Diastolic blood pressure, mmHg                | 79        | 78        | 78        | 79        | 78        | <0.01              |
| Antihypertensive medication, %                | 19.3      | 18.4      | 16.5      | 16.6      | 17.4      | <0.01              |
| Hypertension, %                               | 43.4      | 38.1      | 34.7      | 35.8      | 34.1      | <0.01              |
| Body mass index, kg/m <sup>2</sup>            | 23.6      | 23.5      | 23.5      | 23.5      | 23.3      | <0.01              |
| Overweight (BMI ≥25kg/m <sup>2</sup> )        | 35.8      | 35.0      | 32.6      | 32.8      | 29.2      | <0.01              |
| Total cholesterol, mg/dl                      | 5.12      | 5.28      | 5.33      | 5.53      | 5.59      | <0.01              |
| Total cholesterol ≥5.69 mmol/L, %             | 25.5      | 30.7      | 33.3      | 43.1      | 48.7      | <0.01              |
| Blood glucose, mmol/L                         | 58.2      | 65.7      | 63.2      | 57.6      | 56.6      | <0.01              |
| Diabetes mellitus, %                          | 2.8       | 3.9       | 3.5       | 3.9       | 4.1       | <0.01              |
| Heavy drinking(ethanol intake ≥46g/day)       | 0.5       | 0.3       | 0.3       | 0.3       | 0.6       | 0.549              |
| Current smoking, %                            | 6.4       | 5.7       | 5.6       | 6.0       | 6.1       | 0.659              |
| ECG findings                                  |           |           |           |           |           |                    |
| Atrial fibrillation                           | 0.6       | 0.5       | 0.3       | 0.3       | 0.3       | <0.01              |
| Ventricular premature contraction             | 2.0       | 2.2       | 1.7       | 1.8       | 1.9       | 0.269              |
| Supraventricular premature contraction        | 2.3       | 2.5       | 2.9       | 2.4       | 2.5       | 0.653              |
| Major ST-T abnormality                        | 6.5       | 5.8       | 4.9       | 4.4       | 4.6       | 0.970              |
| Minor ST-T abnormality                        | 22.5      | 19.0      | 19.9      | 20.0      | 17.4      | 0.283              |
| PQ prolonged                                  | 0.5       | 0.5       | 0.4       | 0.5       | 0.4       | 0.063              |
| Complete/incomplete right bundle branch block | 3.1       | 3.4       | 3.1       | 3.2       | 3.0       | <0.01              |
| Wide QRS                                      | 1.4       | 1.6       | 1.5       | 1.6       | 1.5       | 0.598              |
| Abnormal Q wave                               | 0.1       | 0.2       | 0.2       | 0.2       | 0.3       | 0.010              |
| Left ventricular hypertrophy                  | 10.8      | 9.6       | 7.7       | 5.7       | 4.5       | <0.01              |

Supplemental Table 3. Trends for age- and sex-adjusted cardiovascular risk characteristics among men and women aged 40 to 74 years in Ikawa and Kyowa with high participation rates from 1981 to 2005.

|                                               | 1981-1985 | 1986-1990 | 1991-1995 | 1996-2000 | 2001-2005 | <i>p</i> for trend |
|-----------------------------------------------|-----------|-----------|-----------|-----------|-----------|--------------------|
| Age-adjusted, mean or percent                 |           |           |           |           |           |                    |
| Men                                           |           |           |           |           |           |                    |
| Number                                        | 2698      | 2384      | 2533      | 2506      | 2381      |                    |
| Age, year                                     | 55        | 55        | 57        | 59        | 59        |                    |
| Systolic blood pressure, mmHg                 | 139       | 136       | 134       | 135       | 133       | <0.01              |
| Diastolic blood pressure, mmHg                | 82        | 83        | 81        | 82        | 82        | 0.913              |
| Antihypertensive medication, %                | 21.7      | 21.7      | 19.3      | 20.6      | 21.6      | 0.425              |
| Hypertension, %                               | 55.0      | 50.3      | 44.1      | 47.4      | 46.7      | <0.01              |
| Body mass index, kg/m <sup>2</sup>            | 22.9      | 23.2      | 23.4      | 23.7      | 23.9      | <0.01              |
| Overweight (BMI ≥25kg/m <sup>2</sup> )        | 27.3      | 32.1      | 29.0      | 32.7      | 36.0      | <0.01              |
| Total cholesterol, mmol/L                     | 4.69      | 4.82      | 4.92      | 5.07      | 5.21      | <0.01              |
| Total cholesterol ≥5.69 mmol/L, %             | 13.4      | 15.5      | 18.5      | 24.0      | 30.5      | <0.01              |
| Blood glucose, mmol/L                         | 59.0      | 72.7      | 70.3      | 64.1      | 61.3      | <0.01              |
| Diabetes mellitus, %                          | 4.2       | 9.1       | 8.1       | 8.1       | 10.3      | <0.01              |
| Heavy drinking(ethanol intake ≥46g/day)       | 39.2      | 37.4      | 16.2      | 16.2      | 27.5      | <0.01              |
| Current smoking, %                            | 65.1      | 61.0      | 56.1      | 53.2      | 47.2      | <0.01              |
| ECG findings, %                               |           |           |           |           |           |                    |
| Atrial fibrillation                           | 1.5       | 1.9       | 1.4       | 1.7       | 1.4       | 0.588              |
| Ventricular premature contraction             | 3.4       | 2.9       | 3.6       | 2.6       | 2.2       | 0.011              |
| Supraventricular premature contraction        | 3.2       | 3.4       | 3.5       | 3.2       | 3.1       | 0.520              |
| Major ST-T abnormality                        | 5.0       | 4.7       | 3.5       | 4.0       | 3.4       | <0.01              |
| Minor ST-T abnormality                        | 11.2      | 9.3       | 11.3      | 10.8      | 9.9       | 0.507              |
| PQ prolonged                                  | 1.4       | 1.1       | 0.9       | 1.2       | 1.0       | 0.375              |
| Complete/incomplete right bundle branch block | 5.1       | 4.9       | 4.8       | 4.8       | 5.6       | 0.628              |
| Wide QRS                                      | 2.9       | 2.6       | 2.8       | 2.8       | 3.1       | 0.634              |
| Abnormal Q wave                               | 0.6       | 0.7       | 0.5       | 0.7       | 0.7       | 0.869              |
| Left ventricular hypertrophy                  | 31.1      | 29.8      | 29.1      | 21.6      | 21.5      | <0.01              |
| Women                                         |           |           |           |           |           |                    |
| Number                                        | 3543      | 3299      | 3618      | 3686      | 3473      |                    |
| Age, year                                     | 55        | 56        | 57        | 57        | 58        |                    |
| Systolic blood pressure, mmHg                 | 136       | 134       | 131       | 132       | 130       | <0.01              |
| Diastolic blood pressure, mmHg                | 80        | 80        | 78        | 78        | 78        | <0.01              |
| Antihypertensive medication, %                | 22.2      | 21.7      | 19.2      | 20.1      | 19.7      | <0.01              |
| Hypertension, %                               | 47.3      | 42.6      | 36.9      | 37.8      | 35.7      | <0.01              |
| Body mass index, kg/m <sup>2</sup>            | 24.0      | 24.1      | 23.9      | 23.9      | 23.8      | <0.01              |
| Overweight (BMI ≥25kg/m <sup>2</sup> )        | 41.3      | 41.7      | 36.4      | 36.4      | 33.6      | <0.01              |
| Total cholesterol, mmol/L                     | 5.06      | 5.23      | 5.26      | 5.42      | 5.51      | <0.01              |
| Total cholesterol ≥5.69 mmol/L, %             | 23.3      | 28.8      | 30.8      | 38.9      | 45.7      | <0.01              |
| Blood glucose, mmol/L                         | 54.8      | 67.7      | 65.3      | 58.3      | 56.4      | <0.01              |
| Diabetes mellitus, %                          | 2.7       | 5.4       | 4.2       | 4.5       | 4.6       | 0.204              |
| Heavy drinking(ethanol intake ≥46g/day)       | 0.4       | 0.4       | 0.1       | 0.1       | 0.5       | 0.525              |
| Current smoking, %                            | 5.3       | 4.2       | 4.3       | 4.7       | 4.8       | 0.600              |
| ECG findings, %                               |           |           |           |           |           |                    |
| Atrial fibrillation                           | 0.6       | 0.7       | 0.4       | 0.5       | 0.4       | 0.133              |
| Ventricular premature contraction             | 2.4       | 2.7       | 1.8       | 2.0       | 2.2       | 0.119              |
| Supraventricular premature contraction        | 2.7       | 2.7       | 2.7       | 2.5       | 3.1       | 0.653              |
| Major ST-T abnormality                        | 7.5       | 6.2       | 4.2       | 4.5       | 3.6       | <0.01              |
| Minor ST-T abnormality                        | 20.8      | 18.2      | 18.2      | 17.9      | 12.9      | <0.01              |
| PQ prolonged                                  | 0.4       | 0.4       | 0.4       | 0.6       | 0.5       | 0.120              |
| Complete/incomplete right bundle branch block | 2.4       | 3.1       | 2.9       | 3.3       | 3.3       | 0.049              |
| Wide QRS                                      | 1.1       | 1.5       | 1.3       | 1.5       | 1.6       | 0.107              |
| Abnormal Q wave                               | 0.1       | 0.2       | 0.1       | 0.1       | 0.3       | 0.254              |
| Left ventricular hypertrophy                  | 11.5      | 10.9      | 10.1      | 7.4       | 5.7       | <0.01              |

Supplemental Table 4. Trends for age- and sex-adjusted cardiovascular risk characteristics among men and women aged 40 to 74 years in Yao and Noichi with lower participation rates from 1981 to 2005.

|                                               | 1981-1985 | 1986-1990 | 1991-1995 | 1996-2000 | 2001-2005 | <i>p</i> for trend |
|-----------------------------------------------|-----------|-----------|-----------|-----------|-----------|--------------------|
| Age-adjusted, mean or percent                 |           |           |           |           |           |                    |
| <b>Men</b>                                    |           |           |           |           |           |                    |
| Number                                        | 1980      | 1931      | 1875      | 1775      | 1657      |                    |
| Age, year                                     | 56        | 57        | 58        | 60        | 61        |                    |
| Systolic blood pressure, mmHg                 | 135       | 132       | 132       | 134       | 133       | 0.401              |
| Diastolic blood pressure, mmHg                | 81        | 80        | 82        | 83        | 83        | <0.01              |
| Antihypertensive medication, %                | 17.0      | 14.9      | 14.1      | 14.2      | 15.8      | 0.251              |
| Hypertension, %                               | 43.7      | 37.5      | 38.3      | 42.2      | 42.6      | 0.598              |
| Body mass index, kg/m <sup>2</sup>            | 22.6      | 22.8      | 23.2      | 23.5      | 24.0      | <0.01              |
| Overweight (BMI ≥25kg/m <sup>2</sup> )        | 25.3      | 26.1      | 32.0      | 36.2      | 35.6      | <0.01              |
| Total cholesterol, mmol/L                     | 4.88      | 5.00      | 5.09      | 5.27      | 5.36      | <0.01              |
| Total cholesterol ≥5.69 mmol/L, %             | 15.3      | 20.9      | 24.7      | 32.6      | 35.9      | <0.01              |
| Blood glucose, mmol/L                         | 67.3      | 67.0      | 65.3      | 62.2      | 62.0      | <0.01              |
| Diabetes mellitus, %                          | 5.4       | 4.9       | 6.3       | 7.0       | 9.0       | <0.01              |
| Heavy drinking(ethanol intake ≥46g/day)       | 26.7      | 21.6      | 23.1      | 22.2      | 21.1      | <0.01              |
| Current smoking, %                            | 55.8      | 50.5      | 47.5      | 45.1      | 40.8      | <0.01              |
| ECG findings, %                               |           |           |           |           |           |                    |
| Atrial fibrillation                           | 1.1       | 1.0       | 0.8       | 0.8       | 1.1       | 0.767              |
| Ventricular premature contraction             | 2.5       | 2.7       | 2.0       | 2.4       | 2.1       | 0.362              |
| Supraventricular premature contraction        | 2.1       | 4.1       | 3.8       | 2.7       | 2.5       | 0.781              |
| Major ST-T abnormality                        | 3.7       | 3.1       | 3.9       | 4.1       | 4.7       | 0.037              |
| Minor ST-T abnormality                        | 14.3      | 10.7      | 14.2      | 13.2      | 14.1      | 0.396              |
| PQ prolonged                                  | 1.5       | 1.1       | 1.8       | 1.5       | 0.9       | 0.567              |
| Complete/incomplete right bundle branch block | 5.5       | 5.2       | 5.4       | 6.6       | 6.8       | 0.023              |
| Wide QRS                                      | 3.0       | 3.1       | 2.8       | 3.8       | 4.1       | 0.035              |
| Abnormal Q wave                               | 0.2       | 0.6       | 0.5       | 0.5       | 0.5       | 0.159              |
| Left ventricular hypertrophy                  | 27.0      | 25.0      | 15.4      | 16.4      | 11.5      | <0.01              |
| <b>Women</b>                                  |           |           |           |           |           |                    |
| Number                                        | 3411      | 3467      | 3513      | 3355      | 3051      |                    |
| Age, year                                     | 55        | 55        | 56        | 58        | 59        |                    |
| Systolic blood pressure, mmHg                 | 133       | 131       | 130       | 130       | 129       | <0.01              |
| Diastolic blood pressure, mmHg                | 79        | 77        | 79        | 80        | 79        | 0.025              |
| Antihypertensive medication, %                | 16.4      | 15.3      | 13.5      | 12.8      | 14.8      | 0.014              |
| Hypertension, %                               | 39.3      | 33.7      | 32.4      | 33.6      | 32.4      | <0.01              |
| Body mass index, kg/m <sup>2</sup>            | 23.1      | 23.0      | 23.0      | 23.0      | 22.8      | <0.01              |
| Overweight (BMI ≥25kg/m <sup>2</sup> )        | 30.3      | 28.6      | 28.7      | 29.0      | 24.2      | <0.01              |
| Total cholesterol, mmol/L                     | 5.20      | 5.33      | 5.40      | 5.64      | 5.67      | <0.01              |
| Total cholesterol ≥5.69 mmol/L, %             | 28.4      | 32.5      | 35.9      | 47.7      | 52.0      | <0.01              |
| Blood glucose, mmol/L                         | 61.6      | 63.9      | 61.3      | 56.8      | 56.9      | <0.01              |
| Diabetes mellitus, %                          | 2.8       | 2.6       | 2.8       | 3.4       | 3.5       | 0.020              |
| Heavy drinking(ethanol intake ≥46g/day)       | 0.5       | 0.3       | 0.5       | 0.5       | 0.7       | 0.151              |
| Current smoking, %                            | 7.5       | 7.1       | 6.9       | 7.4       | 7.5       | 0.774              |
| ECG findings, %                               |           |           |           |           |           |                    |
| Atrial fibrillation                           | 0.6       | 0.3       | 0.2       | 0.1       | 0.2       | <0.01              |
| Ventricular premature contraction             | 1.5       | 1.8       | 1.7       | 1.6       | 1.6       | 0.974              |
| Supraventricular premature contraction        | 2.0       | 2.3       | 3.1       | 2.2       | 2.0       | 0.900              |
| Major ST-T abnormality                        | 5.4       | 5.4       | 5.6       | 4.3       | 5.6       | 0.613              |
| Minor ST-T abnormality                        | 24.2      | 19.8      | 21.6      | 22.3      | 22.5      | 0.721              |
| PQ prolonged                                  | 0.6       | 0.6       | 0.4       | 0.3       | 0.3       | 0.008              |
| Complete/incomplete right bundle branch block | 3.9       | 3.6       | 3.3       | 3.0       | 2.6       | 0.005              |
| Wide QRS                                      | 1.7       | 1.6       | 1.8       | 1.6       | 1.4       | 0.505              |
| Abnormal Q wave                               | 0.1       | 0.2       | 0.3       | 0.2       | 0.4       | 0.015              |
| Left ventricular hypertrophy                  | 10.1      | 8.4       | 5.1       | 4.0       | 3.1       | <0.01              |

**STROBE 2007 (v4) checklist of items to be included in reports of observational studies in epidemiology\***  
**Checklist for cohort, case-control, and cross-sectional studies (combined)**

| Section/Topic             | Item # | Recommendation                                                                                                                                                                                                                                                                                                                                                                                                                                                         | Reported on page # |
|---------------------------|--------|------------------------------------------------------------------------------------------------------------------------------------------------------------------------------------------------------------------------------------------------------------------------------------------------------------------------------------------------------------------------------------------------------------------------------------------------------------------------|--------------------|
| Title and abstract        | 1      | (a) Indicate the study’s design with a commonly used term in the title or the abstract                                                                                                                                                                                                                                                                                                                                                                                 | 1,3                |
|                           |        | (b) Provide in the abstract an informative and balanced summary of what was done and what was found                                                                                                                                                                                                                                                                                                                                                                    | 3                  |
| <b>Introduction</b>       |        |                                                                                                                                                                                                                                                                                                                                                                                                                                                                        |                    |
| Background/rationale      | 2      | Explain the scientific background and rationale for the investigation being reported                                                                                                                                                                                                                                                                                                                                                                                   | 4                  |
| Objectives                | 3      | State specific objectives, including any pre-specified hypotheses                                                                                                                                                                                                                                                                                                                                                                                                      | 4                  |
| <b>Methods</b>            |        |                                                                                                                                                                                                                                                                                                                                                                                                                                                                        |                    |
| Study design              | 4      | Present key elements of study design early in the paper                                                                                                                                                                                                                                                                                                                                                                                                                | 5                  |
| Setting                   | 5      | Describe the setting, locations, and relevant dates, including periods of recruitment, exposure, follow-up, and data collection                                                                                                                                                                                                                                                                                                                                        | 5                  |
| Participants              | 6      | (a) <i>Cohort study</i> —Give the eligibility criteria, and the sources and methods of selection of participants. Describe methods of follow-up<br><i>Case-control study</i> —Give the eligibility criteria, and the sources and methods of case ascertainment and control selection. Give the rationale for the choice of cases and controls<br><i>Cross-sectional study</i> —Give the eligibility criteria, and the sources and methods of selection of participants | 5                  |
|                           |        | (b) <i>Cohort study</i> —For matched studies, give matching criteria and number of exposed and unexposed<br><i>Case-control study</i> —For matched studies, give matching criteria and the number of controls per case                                                                                                                                                                                                                                                 |                    |
| Variables                 | 7      | Clearly define all outcomes, exposures, predictors, potential confounders, and effect modifiers. Give diagnostic criteria, if applicable                                                                                                                                                                                                                                                                                                                               | 6,7                |
| Data sources/ measurement | 8*     | For each variable of interest, give sources of data and details of methods of assessment (measurement). Describe comparability of assessment methods if there is more than one group                                                                                                                                                                                                                                                                                   | 6,7                |
| Bias                      | 9      | Describe any efforts to address potential sources of bias                                                                                                                                                                                                                                                                                                                                                                                                              | 5,6,7              |
| Study size                | 10     | Explain how the study size was arrived at                                                                                                                                                                                                                                                                                                                                                                                                                              | 5                  |
| Quantitative variables    | 11     | Explain how quantitative variables were handled in the analyses. If applicable, describe which groupings were chosen and why                                                                                                                                                                                                                                                                                                                                           | 7                  |
| Statistical methods       | 12     | (a) Describe all statistical methods, including those used to control for confounding                                                                                                                                                                                                                                                                                                                                                                                  | 7                  |
|                           |        | (b) Describe any methods used to examine subgroups and interactions                                                                                                                                                                                                                                                                                                                                                                                                    | 6                  |
|                           |        | (c) Explain how missing data were addressed                                                                                                                                                                                                                                                                                                                                                                                                                            |                    |
|                           |        | (d) <i>Cohort study</i> —If applicable, explain how loss to follow-up was addressed<br><i>Case-control study</i> —If applicable, explain how matching of cases and controls was addressed                                                                                                                                                                                                                                                                              |                    |

|                          |     |                                                                                                                                                                                                              |           |
|--------------------------|-----|--------------------------------------------------------------------------------------------------------------------------------------------------------------------------------------------------------------|-----------|
|                          |     | <i>Cross-sectional study</i> —If applicable, describe analytical methods taking account of sampling strategy                                                                                                 |           |
|                          |     | (e) Describe any sensitivity analyses                                                                                                                                                                        |           |
| <b>Results</b>           |     |                                                                                                                                                                                                              |           |
| Participants             | 13* | (a) Report numbers of individuals at each stage of study—eg numbers potentially eligible, examined for eligibility, confirmed eligible, included in the study, completing follow-up, and analysed            | 8         |
|                          |     | (b) Give reasons for non-participation at each stage                                                                                                                                                         |           |
|                          |     | (c) Consider use of a flow diagram                                                                                                                                                                           | 5,figure1 |
| Descriptive data         | 14* | (a) Give characteristics of study participants (eg demographic, clinical, social) and information on exposures and potential confounders                                                                     | 9         |
|                          |     | (b) Indicate number of participants with missing data for each variable of interest                                                                                                                          |           |
|                          |     | (c) <i>Cohort study</i> —Summarise follow-up time (eg, average and total amount)                                                                                                                             |           |
| Outcome data             | 15* | <i>Cohort study</i> —Report numbers of outcome events or summary measures over time                                                                                                                          |           |
|                          |     | <i>Case-control study</i> —Report numbers in each exposure category, or summary measures of exposure                                                                                                         |           |
|                          |     | <i>Cross-sectional study</i> —Report numbers of outcome events or summary measures                                                                                                                           | 8,table1  |
| Main results             | 16  | (a) Give unadjusted estimates and, if applicable, confounder-adjusted estimates and their precision (eg, 95% confidence interval). Make clear which confounders were adjusted for and why they were included | 8         |
|                          |     | (b) Report category boundaries when continuous variables were categorized                                                                                                                                    | 7         |
|                          |     | (c) If relevant, consider translating estimates of relative risk into absolute risk for a meaningful time period                                                                                             |           |
| Other analyses           | 17  | Report other analyses done—eg analyses of subgroups and interactions, and sensitivity analyses                                                                                                               | 8         |
| <b>Discussion</b>        |     |                                                                                                                                                                                                              |           |
| Key results              | 18  | Summarise key results with reference to study objectives                                                                                                                                                     | 9,10      |
| Limitations              | 19  | Discuss limitations of the study, taking into account sources of potential bias or imprecision. Discuss both direction and magnitude of any potential bias                                                   | 12        |
| Interpretation           | 20  | Give a cautious overall interpretation of results considering objectives, limitations, multiplicity of analyses, results from similar studies, and other relevant evidence                                   | 11        |
| Generalisability         | 21  | Discuss the generalisability (external validity) of the study results                                                                                                                                        | 12        |
| <b>Other information</b> |     |                                                                                                                                                                                                              |           |
| Funding                  | 22  | Give the source of funding and the role of the funders for the present study and, if applicable, for the original study on which the present article is based                                                | 15        |

\*Give information separately for cases and controls in case-control studies and, if applicable, for exposed and unexposed groups in cohort and cross-sectional studies.

**Note:** An Explanation and Elaboration article discusses each checklist item and gives methodological background and published examples of transparent reporting. The STROBE checklist is best used in conjunction with this article (freely available on the Web sites of PLoS Medicine at <http://www.plosmedicine.org/>, Annals of Internal Medicine at <http://www.annals.org/>, and Epidemiology at <http://www.epidem.com/>). Information on the STROBE Initiative is available at [www.strobe-statement.org](http://www.strobe-statement.org).





**Trends in Sudden Cardiac Death and Its Risk Factors in Japan from 1981 to 2005: The Circulatory Risk in Communities Study (CIRCS)**

|                                 |                                                                                                                                                                                                                                                                                                                                                                                                                                                                                                                                                                                                                                                                                                                                                                                                                                                                                                                                                                                                                                                                                                                                             |
|---------------------------------|---------------------------------------------------------------------------------------------------------------------------------------------------------------------------------------------------------------------------------------------------------------------------------------------------------------------------------------------------------------------------------------------------------------------------------------------------------------------------------------------------------------------------------------------------------------------------------------------------------------------------------------------------------------------------------------------------------------------------------------------------------------------------------------------------------------------------------------------------------------------------------------------------------------------------------------------------------------------------------------------------------------------------------------------------------------------------------------------------------------------------------------------|
| Journal:                        | <i>BMJ Open</i>                                                                                                                                                                                                                                                                                                                                                                                                                                                                                                                                                                                                                                                                                                                                                                                                                                                                                                                                                                                                                                                                                                                             |
| Manuscript ID:                  | bmjopen-2011-000573.R2                                                                                                                                                                                                                                                                                                                                                                                                                                                                                                                                                                                                                                                                                                                                                                                                                                                                                                                                                                                                                                                                                                                      |
| Article Type:                   | Research                                                                                                                                                                                                                                                                                                                                                                                                                                                                                                                                                                                                                                                                                                                                                                                                                                                                                                                                                                                                                                                                                                                                    |
| Date Submitted by the Author:   | 01-Feb-2012                                                                                                                                                                                                                                                                                                                                                                                                                                                                                                                                                                                                                                                                                                                                                                                                                                                                                                                                                                                                                                                                                                                                 |
| Complete List of Authors:       | Maruyama, Minako; Osaka University Graduate School of Medicine, Public Health, Department of Social and Environmental Medicine<br>Ohira, Tetsuya; Osaka University Graduate School of Medicine, Public Health, Department of Social and Environmental Medicine<br>Imano, Hironori; Osaka University Graduate School of Medicine, Public Health, Department of Social and Environmental Medicine<br>Kitamura, Akihiko; Osaka Medical Center for Health Science and Promotion, Kiyama, Masahiko; Osaka Medical Center for Health Science and Promotion,<br>Okada, Takeo; Osaka Medical Center for Health Science and Promotion, Maeda, Kenji; Osaka Medical Center for Health Science and Promotion, Yamagishi, Kazumasa; Department of Public Health Medicine, University of Tsukuba,<br>Noda, Hiroyuki; Medical Center for Translational Research, Ishikawa, Yoshinori; Osaka Medical Center for Health Science and Promotion,<br>Shimamoto, Takashi; Osaka Medical Center for Health Science and Promotion,<br>Iso, Hiroyasu; Osaka University Graduate School of Medicine, Public Health, Department of Social and Environmental Medicine |
| <b>Primary Subject Heading</b>: | Epidemiology                                                                                                                                                                                                                                                                                                                                                                                                                                                                                                                                                                                                                                                                                                                                                                                                                                                                                                                                                                                                                                                                                                                                |
| Secondary Subject Heading:      | Public health, Cardiovascular medicine                                                                                                                                                                                                                                                                                                                                                                                                                                                                                                                                                                                                                                                                                                                                                                                                                                                                                                                                                                                                                                                                                                      |
| Keywords:                       | Hypertension < CARDIOLOGY, Coronary heart disease < CARDIOLOGY, EPIDEMIOLOGY                                                                                                                                                                                                                                                                                                                                                                                                                                                                                                                                                                                                                                                                                                                                                                                                                                                                                                                                                                                                                                                                |
|                                 |                                                                                                                                                                                                                                                                                                                                                                                                                                                                                                                                                                                                                                                                                                                                                                                                                                                                                                                                                                                                                                                                                                                                             |

SCHOLARONE™  
Manuscripts

1  
2  
3 Trends in Sudden Cardiac Death and Its Risk Factors in Japan from 1981 to 2005: The Circulatory  
4 Risk in Communities Study (CIRCS)  
5  
6  
7  
8  
9

10 Minako Maruyama, MSc<sup>1,2</sup>, Tetsuya Ohira, MD<sup>1,2</sup>, Hironori Imano, MD<sup>1,2</sup>, Akihiko Kitamura, MD<sup>2</sup>,  
11 Masahiko Kiyama, MD<sup>2</sup>, Takeo Okada, MD<sup>2</sup>, Kenji Maeda, MD<sup>2</sup>, Kazumasa Yamagishi, MD<sup>2,3</sup>,  
12 Hiroyuki Noda, MD<sup>2,4</sup>, Yoshinori Ishikawa, MD<sup>2</sup>, Takashi Shimamoto, MD<sup>2</sup>, Hiroyasu Iso, MD<sup>1\*</sup>.  
13  
14  
15  
16  
17  
18

19 <sup>1</sup>Department of Social and Environmental Medicine, Osaka University, Suita, JAPAN

20 <sup>2</sup>Osaka Medical Center for Health Science and Promotion, Osaka, JAPAN

21 <sup>3</sup>Department of Public Health Medicine, University of Tsukuba, Tsukuba, JAPAN

22 <sup>4</sup>Medical Center for Translational Research, Osaka University Hospital, Suita, JAPAN  
23  
24  
25  
26  
27  
28  
29

30 \*Corresponding author. Hiroyasu Iso, MD, PhD, MPH, Professor of Public Health, Department of  
31 Social and Environmental Medicine, Osaka University Graduate School of Medicine, 2-2 Yamadaoka,  
32 Suita, Osaka 565-0871 JAPAN.  
33  
34  
35

36 Phone: +81-6-6879-3911, Fax: +81-6-6879-3919, E-mail:iso@pbhel.med.osaka-u.ac.jp  
37  
38  
39  
40

41 **Key words:** sudden cardiac death, incidence, general population, Japanese  
42  
43  
44

45 **Word counts:**3,416words  
46  
47  
48  
49  
50  
51  
52  
53  
54  
55  
56  
57  
58  
59  
60

## Abstract

**Objective** - There is little evidence whether sudden cardiac death (SCD) increases in Asia, although the incidence of coronary heart disease among urban middle-aged Japanese men has increased recently.

Then, we examined trends for the incidence of SCD and its risk factors in the Circulatory Risk in Communities Study (CIRCS).

**Design and Setting** - Population-based longitudinal study. Surveillance of men and women for the SCD incidence and risk factors was conducted from 1981 to 2005.

**Subjects** - The surveyed population was all residents of men and women aged 30 to 84 years in three rural and an urban communities in Japan.

**Main outcome measures** - Trends in SCD incidence and its risk factors.

**Results** - Age- and sex-adjusted incidence of SCD decreased from 1981-1985 to 1991-1995, and plateaued thereafter; the annual incidence per 100,000 person-year in the 5 time periods was 76.0, 57.9, 39.3, 31.6, and 36.8, respectively. The prevalence of hypertension decreased from 1981-1985 to 1991-1995, and plateaued thereafter for both men and women. The age- adjusted prevalence of current smoking for men decreased, while that of diabetes mellitus for both sexes increased from 1981-1985 to 2001-2005.

**Conclusions** - The incidence of SCD decreased from 1981 to 1995 but unchanged from 1995 to 2005.

The continuous surveillance is necessary to clarify future trends for SCD in Japan, because of an increasing trend for diabetes mellitus.

1  
2  
3  
4  
5  
6  
7  
8  
9  
10  
11  
12  
13  
14  
15  
16  
17  
18  
19  
20  
21  
22  
23  
24  
25  
26  
27  
28  
29  
30  
31  
32  
33  
34  
35  
36  
37  
38  
39  
40  
41  
42  
43  
44  
45  
46  
47  
48  
49  
50  
51  
52  
53  
54  
55  
56  
57  
58  
59  
60

In the United States, estimates of the annual number of sudden cardiac death (SCD) range from 184,000 to 400,000, accounting for almost half of all coronary heart disease (CHD) deaths [1-4]. The incidence of SCD was 50% higher in men than women, and the age-adjusted annual incidence of SCD per 100,000 person was 410.6 for men and 274.6 for women in 1998 among US residents aged  $\geq 35$  years [3]. Several population-based studies have reported on the incidence of SCD among Japanese [5-8], however these studies are questionable due to methodological problems, such as small sample size [7], and a working population [8], and an inaccurate definition of SCD based on death certificate data only [6]. Baba et al. reported from a sample from Suita City (census population: approximately 340,000) that in persons aged 20 to 74 years, the incidence of SCD was 31 (men = 45, women = 20) per 100,000 people. Information on SCD was determined using police records [5]. This suggests that the incidence of SCD in Japan is about one-fifth of that in the United States [1, 3, and 9].

SCD is generally considered to be caused by CHD. The CHD mortality rate in Japan has been observed to be one-third to one-fifth of that in the United States [6, 9, and 10]: this difference might explain the difference in the incidence of SCD between Japan and the United States. However, Kitamura et al. reported a significant increase in the incidence of CHD among middle-aged urban Japanese men from 1980-87 to 1996-2003 [11]. Therefore we expected that the incidence of SCD for Japanese individuals may have increased in recent decades. So far, no epidemiological study has been reported which has investigated trends in the incidence of SCD in a large population-based study.

Therefore the purpose of this study was to examine trends in the incidence of SCD and its risk factors in the Circulatory Risk in Communities Study (CIRCS), a longitudinal community-based study of men and women.

## Methods

The CIRCS is a population-based study of cardiovascular risk factors, disease incidence, and their respective trends in Japanese communities. Details of the study design and procedures of CIRCS have been reported elsewhere [11-14]. Briefly, the subjects were Japanese men and women who lived in a north-eastern rural community, Ikawa, a south-western rural community, Noichi, a central rural community, Kyowa, and a south-western urban suburb, the Minami-Takayasu district of Yao. Annual cardiovascular risk surveys have been conducted since 1963 in the district of Yao City and Ikawa, since 1969 in Noichi and since 1981 in Kyowa by a joint research team from the Osaka Medical Center for Health Science and Promotion, the University of Tsukuba, and Osaka University. The census populations of ages 30 to 84 years in Ikawa were 3,983 in 1985, 4,166 in 1995, and 4,173 in 2000, while the corresponding totals were: 12,940, 14,170, and 14,825 in Yao; 8,149, 10,772, and 10,573 in Noichi; and 9,614, 9590, and 10,948 in Kyowa.

Informed consent was obtained from community representatives to conducting an epidemiological study based on guidelines established by the Council for International Organizations of Medical Science [15]. This study was approved by the Ethics Committee of the Osaka Medical Center for Health Science and Promotion.

We included in our study all SCD events that occurred among all residents between January 1, 1981 and December 31, 2005. The events of CHD and SCD were ascertained from national insurance claims, reports by local physicians, ambulance records, death certificates, reports by public health nurses and health volunteers, and annual cardiovascular risk surveys (Figure 1) [11-14]. Subjects who had moved out from the community or died were censored case. For confirmation of the diagnosis, we also obtained histories from next of kin and reviewed medical records in local hospitals.

The criteria for CHD were modified from those of the World Health Organization Expert Committee [16]. The indication for definite myocardial infarction (MI) was typical, severe chest pain (lasting at least 30 minutes and without definite non-ischemic cause) accompanied by new, abnormal,

1  
2  
3 and persistent Q or QS waves, consistent changes in cardiac enzyme levels, or both. If the  
4  
5 electrocardiographic and enzyme levels were non-diagnostic or unavailable, but the patient suffered  
6  
7 typical chest pain, a diagnosis of possible MI was made. For our study, definite and possible infarctions  
8  
9 were combined into a single category, MI. These criteria are essentially the same as those of the  
10  
11 WHO-MONICA project [17]. Angina pectoris was defined as repeated episodes of chest pain during  
12  
13 effort, usually disappearing rapidly after the cessation of effort or upon use of sublingual  
14  
15 nitro-glycerine [12, 13]. In the present study, CHD included definite or probable MI and angina  
16  
17 pectoris.  
18  
19

20  
21 SCD was defined as sudden unexpected death either within 1 hour of symptom onset or within  
22  
23 24 hours of having been observed alive and symptom-free. We excluded candidate cases if they  
24  
25 survived for over 24 hours after symptom onset, or if there was another apparent cause of death, such  
26  
27 as stroke, cancer, or accident. The final diagnosis of SCD was made by a panel of three or four trained  
28  
29 physician-epidemiologists, blinded to the data of cardiovascular risk factors. We further classified the  
30  
31 SCD cases into two groups according to the presence or absence of MI [18]. If the SCD case was  
32  
33 accompanied with MI, it grouped SCD with MI (SCD\_MI), and others were grouped as SCD without  
34  
35 MI (SCD\_NMI). In addition, SCD cases were divided into two groups stratified by time of symptom  
36  
37 onset. If the time of symptom onset was within 1 hour, they were categorized as SCD1, and if it  
38  
39 occurred within 24 hours but they were not SCD1, they were categorized as SCD1-24. Finally, SCD  
40  
41 cases were divided into two groups based on place of death [3]. If the place of death was in emergency  
42  
43 room (ER) or a hospital, the case was categorized as SCD\_ER, and if it was outside of a hospital, it was  
44  
45 categorized as SCD\_NER (Table 1).  
46  
47  
48

49  
50 Age- and sex-adjusted annual incidence of SCD was calculated from the number of new cases  
51  
52 per 100,000 person-year during the periods, 1981 - 1985, 1986 - 1990, 1991 - 1995, 1996 - 2000, and  
53  
54 2001 - 2005, in the aforementioned four Japanese communities. The rate of moving out from the  
55  
56 community was 2.1%, 3.1%, 2.8%, 2.9% and 1.9%, respectively. In this study, all analyses were  
57  
58  
59  
60

1  
2  
3 limited to men and women aged 30 to 84 years because the number of SCD cases aged <30 years was  
4 too small (<1%), and for many cases aged  $\geq 85$  years their causes of death were difficult to be  
5 identified.  
6  
7  
8

9  
10 Cardiovascular risk factors were ascertained from the participants of residents in risk factor  
11 surveys during each of the five survey periods. They were recruited from all residents who were ages  
12 30 to 84 years in four communities, and the surveys were conducted for the purpose of promoting  
13 primary prevention of cardiovascular disease (CVD). The participation rate among the census  
14 population in each survey period was 41.9%, 36.8%, 37.1%, 34.8%, and 32.0%, respectively. When the  
15 subjects were restricted to ages 40 to 74 years, the respective participation rate was 57.2%, 48.2%,  
16 44.2%, 40.1% and 35.4%. Further, the participation rate for ages 40 to 74 years in Ikawa and Kyowa  
17 (with high participation rates) was 73.9%, 62.7%, 61.1%, 57.3%, and 53.6%, respectively, while that in  
18 Yao and Noichi (with lower participation rates) was 45.3%, 38.8%, 33.6%, 29.4%, and 26.1%,  
19 respectively. If the subjects participated in the risk factor survey more than once during each survey  
20 period, we used the data from the earliest year.  
21  
22  
23  
24  
25  
26  
27  
28  
29  
30  
31  
32  
33

34 The items examined for the risk factor surveys included: medical history, measurement of total  
35 cholesterol, blood pressure, body mass index (BMI), blood glucose, electrocardiogram (ECG) findings,  
36 and drinking and smoking habits [11]. Hypertension was defined as a systolic blood pressure (BP)  $\geq$   
37 140 mmHg, or a diastolic BP  $\geq$  90 mmHg, or use of an anti-hypertensive medication. Diabetes mellitus  
38 was defined as a fasting glucose level  $\geq$  7.00 mmol/l, a nonfasting glucose level  $\geq$  11.10mmol/l, or use  
39 of an antidiabetic medication. Overweight was defined as a BMI  $\geq$  25 kg/m<sup>2</sup>. The ECG data were  
40 obtained with the subject in the supine position and were coded with the Minnesota Code, second  
41 version [19], by trained physician-epidemiologists.  
42  
43  
44  
45  
46  
47  
48  
49  
50  
51

52 To calculate age- and sex-adjusted incidence, we employed the direct standardization method  
53 using the age and sex distributions of the Japanese national model population from 1985 as standard  
54 population. Linear trends in incidence were examined with the chi-square test. We calculated 95% CI  
55  
56  
57  
58  
59  
60

as following equation,

$$: \text{ age-adjusted annual incidence of SCD } \pm 1.96 \text{ square root } \left( \frac{\sum \left[ \frac{N_i^2 p_i (1 - p_i)}{n_i} \right]}{\left[ \sum N_i \right]^2} \right)$$

, where  $N$  is the standard population for 5-year age category  $i$ ,  $p$  is the crude incidence of the population for age category  $i$ ,  $n$  is the number of the population for age category  $i$ . Sex-specific age-adjusted means of risk factors were estimated by analysis of covariance, and age-adjusted prevalence by the direct method of standardization.

The significance of risk factor trends was examined for continuous variables by using the regression analysis for repeated measures [11], with the five periods represented as 1982.5, 1987.5, 1992.5, 1997.5 and 2002.5, and for discrete variables by using the chi-square test for trends. All statistical analyses were performed with the SAS System for Windows (Version 9.1, SAS Institute, Cary, NC).

## Results

In the present study, 471 individuals with SCD were identified over 25 years, consisting of 117 SCD\_MI and 354 SCD\_NMI, 163 SCD1 and 308 SCD1-24, 190 SCD\_NER, and 281 SCD\_ER. The number of SCD (in parenthesis, SCD\_MI) was presented according to the time of symptom onset and the place of death (Supplemental Table 1).

As shown in Table 1, age- and sex-adjusted incidence of SCD decreased from 1981-1985 to 1991-1995, however plateaued after 1996 ( $p$  for trend was  $p < 0.01$  from 1981-1985 to 1991-1995, and  $p = 0.73$  from 1991-1995 to 2001-2005). The annual incidence (95%CI) of SCD per 100,000 person-year during the five periods were 76.0 (44.8 to 107.2), 57.9(32.7 to 83.1), 39.3(20.3 to 58.3), 31.6(15.6 to 47.6) and 36.8(19.8 to 53.8), respectively. A total of 731 individuals with CHD were identified over 25 years: 256 with definite MI, 254 with probable MI, and 221 with angina pectoris,



1  
2  
3 and the number of CHD deaths was 178 cases. The features of the SCD trends for the age groups 30-64,  
4  
5 65-74 and also 40-74 were similar to those of the overall trend, while there was a constant decline in  
6  
7 the SCD incidence for age group 75-84...

8  
9  
10 A similar trend was observed for age- and sex-adjusted incidence of CHD; the annual incidence  
11  
12 (95%CI) of CHD per 100,000 person-year was 98.2(62.7 to 133.7), 87.0(56.0 to 118.0), 78.0(50.9 to  
13  
14 105.1), 50.0(29.8 to 70.2) and 57.5(36.5 to 78.5), respectively, while a slightly different trend was  
15  
16 observed for MI; the annual incidence (95%CI) of MI per 100,000 person-year was 55.2(28.6 to 81.8),  
17  
18 58.9(33.4 to 84.4), 57.5(34.4 to 80.6), 34.6(17.9 to 51.3) and 45.6(26.9 to 64.3) (not shown in Table).  
19  
20

21 The incidence of SCD was two to three times higher for men than for women, while age- adjusted  
22  
23 annual incidence (95%CI) of SCD per 100,000 person-year during the five time periods were  
24  
25 111.7(53.1 to 170.3), 82.1(36.0 to 128.2), 54.4(20.2 to 88.6), 49.3(18.6 to 80.0) and 57.9(26.2 to 89.6)  
26  
27 for men and 50.6(17.1 to 84.1), 39.5(12.0 to 67.0), 27.1(6.3 to 47.9), 16.7(2.0 to 31.4) and 18.2(2.5 to  
28  
29 33.9)for women (Table 1).  
30  
31

32 We further analyzed the incidence of SCD stratified by the presence or absence of MI, the time of  
33  
34 symptom onset and the place of death (Figure 2). The age- and sex-adjusted annual incidence (95%CI)  
35  
36 of SCD per 100,000 person-year was 16.1(1.7 to 30.5), 15.5(2.4 to 28.6), 14.0, (2.7 to 25.3) 5.3(0 to  
37  
38 11.7) and 8.4(0.3 to 16.5) for SCD\_MI and 59.8(32.1 to 87.5), 42.4(20.8 to 64.0), 25.3(10.0 to 40.6),  
39  
40 26.4(11.7 to 41.1) and 28.4(13.4 to 43.4) for SCD\_NMI. The calculation of the incidence stratified by  
41  
42 the time of symptom onset yielded age- and sex-adjusted annual incidence (95%CI) per 100,000  
43  
44 person-year of 27.4(8.6 to 46.2), 19.7(4.9 to 34.5), 12.7(1.9 to 23.5),9.2(0.3 to 18.1) and 15.7(4.4 to  
45  
46 27.0) for SCD1, and 48.6(23.7 to 73.5), 38.1(17.7 to 58.5), 26.6(10.9 to 42.3), 22.5(9.1 to 35.9) and  
47  
48 21.1(8.4 to 33.8) for SCD1-24. The calculation of the incidence stratified by the place of death yielded  
49  
50 the age- and sex-adjusted annual incidence (95%CI) per 100,000 person-year of 41.0(18.0 to 64.0),  
51  
52 25.1(8.5 to 41.7), 12.8(2.1 to 23.5), 11.4(1.9 to 20.9) and 10.5(1.7 to 19.3) for SCD\_NER, and  
53  
54 35.0(13.9 to 56.1), 32.7(13.7 to 51.7), 26.5(10.7 to 42.3), 20.2(7.3 to 33.1) and 26.2(11.6 to 40.8) for  
55  
56  
57  
58  
59  
60

1  
2  
3 SCD\_ER. These trends showed similar features to those of the overall trend.  
4

5  
6 Moreover, we estimated the national SCD incidence in 2009 by using the results from this study.  
7  
8 For this estimation, we multiplied the age- and sex-specific populations in 2009 by the age- and  
9  
10 sex-specific incidences of SCD from 2001 to 2005. For the population aged 85 years or over, we used  
11  
12 the incidence of SCD for ages 75 to 84 years. We predicted the number of cases of SCD in Japan to be  
13  
14 at least 51,700 cases in 2009.  
15

16  
17 As shown in Table 2, the overall trends for risk factors of SCD showed the same features for men  
18  
19 and women, except for diastolic BP, BMI, current smoking and heavy drinking. Mean diastolic BP for  
20  
21 women decreased from 1981-1985 to 2001-2005 ( $p$  for trend was  $<0.01$ ), whereas that for men was  
22  
23 constant from 1981-1985 to 1991-1995, but increased after 1996 ( $p$  for trend was  $<0.01$ ). For both men  
24  
25 and women, mean systolic BP decreased from 1981-1985 to 2001-2005 ( $p$  for trend was  $<0.01$ ). The  
26  
27 prevalence of hypertension decreased from 1981-1985 to 1991-1995, but plateaued after 1996 in both  
28  
29 sexes. The mean BMI for women declined from 1981-1985 to 2001-2005 ( $p$  for trend was  $<0.01$ ),  
30  
31 whereas BMI for men increased. The prevalence of both current smoking and heavy drinking  
32  
33 decreased constantly from 1981-1985 to 2001-2005 ( $p$  for trend was  $<0.01$ , for both) for men, but did  
34  
35 not change for women. Mean levels of total cholesterol, and the prevalence of diabetes mellitus  
36  
37 increased continuously from 1981-1985 to 2001-2005 ( $p$  for trend was  $<0.01$ , respectively) for both  
38  
39 sexes. The prevalence of left ventricular hypertrophy dramatically decreased from 1981-1985 to  
40  
41 2001-2005 ( $p$  for trend was  $<0.01$ , for both sexes). Additionally, we examined the risk factor trends for  
42  
43 ages 40 to 74 years (Supplemental Table 2), and also stratified by community (Ikawa and Kyowa:  
44  
45 Supplemental Table 3/ Yao and Noichi: Supplemental Table 4), and found the same trends.  
46  
47  
48  
49  
50  
51

## 52 Discussion

53  
54 In this longitudinal community-based study from 1981 to 2005, we found that the age- and  
55  
56 sex-adjusted annual incidence of SCD decreased from 1981 to 1995, and plateaued thereafter. This  
57  
58  
59  
60

1  
2  
3 trend was similarly observed when SCD was stratified by the presence of MI, in which MI constituted  
4 approximately 20 to 35% of all SCD, the time of symptom onset, in which SCD within 1 hour  
5 constituted approximately 30% to 45% of all SCD, and the place of death, in which SCD in emergency  
6 room or hospital constituted approximately 45% to 70% of all SCD. Although the incidence of SCD  
7 was higher for men than for women consistent with previous reports [3, 20], trends for the incidence of  
8 SCD did not vary according to age or sex. Since Japan is a rapidly aging country, the number of SCD  
9 in Japan, although much lower than in the United States [3], may increase in the future due to an  
10 increased elderly population.

11  
12 Several population-based studies have previously reported the incidence of SCD among Japanese.  
13 The Hisayama study reported that the age-adjusted annual incidence rate of SCD between 1988 and  
14 2000 was 76 per 100,000 person-years for men and 19 per 100,000 person-years for women aged 40  
15 and over, and that the incidence rate did not change during the study period. However, the size of this  
16 population sample was 1,110 for men and 1,527 for women, which made it difficult to evaluate trends  
17 in the incidence of SCD [7]. Baba et al. reported that the annual SCD incidence was 45 per  
18 100,000 persons for men and 20 per 100,000 persons for women for subjects aged 20 to 74 years in  
19 Suita City in 1992 [5]. Our study showed similar age-adjusted annual incidence of SCD (57.9 per  
20 100,000 person-year for men and 18.2 per 100,000 person-year for women aged 30 to 84 years) in  
21 2001-2005.

22  
23 In Western countries, SCD accounts for almost half of all CHD deaths [2, 21], while CHD  
24 accounted for at least 80% of all SCD cases [22]. In the present study, SCD accounts for 10% of all  
25 CHD deaths, while CHD accounted for 25% of all SCD cases which was generally consistent with the  
26 finding from a previous Japanese population-based study [20]. The lower incidence [11] and mortality  
27 [9, 10, and 23] from CHD in Japan than in the United States probably correspond to the lower  
28 incidence of SCD in Japanese.

29  
30 Several population-based studies have reported the age-adjusted annual incidence of MI among  
31  
32  
33  
34  
35  
36  
37  
38  
39  
40  
41  
42  
43  
44  
45  
46  
47  
48  
49  
50  
51  
52  
53  
54  
55  
56  
57  
58  
59  
60

1  
2  
3 Japanese men and women [24-26]: 42.3 per 100,000 person for ages 20 years and more in 1988-1998  
4  
5 [24], 45.8 per 100,000 population for ages 35 to 64 years in 1994-1996 [25], and 49.7 per 100,000  
6  
7 person for ages 20 years and more in 1996-1998 [26]. In the present study, the age-adjusted annual  
8  
9 incidence of MI for ages 30 to 84 years was 34.6 to 58.9 per 100,000 person-year in 1981-2005. These  
10  
11 findings confirm the low incidence of CHD in Japan. However, Rumana et al. reported that the  
12  
13 incidence of acute MI increased from 1990-92 to 1999-2001 in the Takashima AMI Registry [26].  
14  
15 Furthermore, Kitamura et al. reported a significant increase in the incidence of CHD from 1980-87 to  
16  
17 1996-2003 for middle-aged men in an urban community [11], which was involved in this CIRCUS.  
18  
19 Because the prevalence of overweight and diabetes mellitus increased during the last two decades as  
20  
21 seen in our study and other Japanese studies [9, 11, and 27], the incidence of SCD might increase in the  
22  
23 future.  
24  
25  
26

27  
28 We found in the data presented here that the incidence of SCD\_ER decreased from 1981 to 1995,  
29  
30 but plateaued after 1996, whereas the incidence of SCD\_NER has decreased steadily over time. The  
31  
32 plateauing trend of SCD\_ER may be due to the doubling of the number of patients transported to  
33  
34 emergency rooms by ambulance between 1996 and 2006 [28].  
35

36  
37 Risk factors for SCD among Americans have been identified as hypertension, hypertensive  
38  
39 organic change, elderly age, male sex, smoking, heavy drinking, overweight, diabetes and left  
40  
41 ventricular hypertrophy [3]. Hypertension, current smoking, and diabetes mellitus were found the  
42  
43 potential risk factors for SCD among Japanese [20,29]. In the present study, the SCD incidence  
44  
45 decreased from 1981 to 1995 when a reduction in the prevalence of hypertension and current smoking  
46  
47 was observed. The SCD incidence remained unchanged from 1996 to 2005 when there were the  
48  
49 unchanged prevalence of hypertension, the decreased prevalence of current smoking and the increased  
50  
51 prevalence of diabetes mellitus.  
52

53  
54 The strength of the present study is that we analyzed trends for SCD using population-based data,  
55  
56 including both urban and rural areas, from a large number of participants in a long-term observational  
57  
58  
59  
60

1  
2  
3 study. The cause of death from death certificates was validated by medical records and/or information  
4  
5 from next of kin. In addition, annual cardiovascular risk factor surveys ascertained the trends for  
6  
7 predisposing risk factors of SCD.  
8  
9

10  
11 Nonetheless, our study has a few limitations. First, we only examined the incidence of SCD for  
12  
13 the age range of 30 to 84 years old. However the frequency of SCD among persons < 30 years old was  
14  
15 less than 1 % even in the United States [3], so this age window is unlikely to substantially affect the  
16  
17 results. Second, although clinical features and neuroimaging reports were used to exclude death due to  
18  
19 stroke, some cases may have been misclassified, especially in the case of an out-of-hospital death. Such  
20  
21 misclassification may well have affected the changes in the incidence of SCD occurred out-of-hospital.  
22

23  
24 Third, since we did not include the resuscitated SCD for over 24 hours after symptom onset, the true  
25  
26 incidence of SCD might be underestimated. However, the magnitude of underestimation should be  
27  
28 small because the annual number of resuscitated cardiac arrest cases in our surveyed population was  
29  
30 estimated only around 0.7, based on the 2005 statistics of Fire and Disaster Management Agency [30].  
31

32  
33 In conclusion, age- and sex-adjusted incidence of SCD for a general Japanese population  
34  
35 decreased from 1981-1985 to 1991-1995, and plateau after 1996, when a reduction in the prevalence of  
36  
37 hypertension and current smoking was observed. The continuous surveillance is necessary to clarify  
38  
39 future trends for SCD in Japan, because of an increasing trend for diabetes mellitus.  
40  
41  
42  
43  
44  
45  
46  
47  
48  
49  
50  
51  
52  
53  
54  
55  
56  
57  
58  
59  
60

Table 1. Trends for age- and sex- adjusted incidence of sudden cardiac death per 100,000 person-year and 95% CI among men and women aged 30 to 84 years in four Japanese communities from 1981 to 2005.

|                                                                             | 1981-1985        | 1986-1990        | 1991-1995       | 1996-2000       | 2001-2005       | p for trend |
|-----------------------------------------------------------------------------|------------------|------------------|-----------------|-----------------|-----------------|-------------|
| <b>Total</b>                                                                |                  |                  |                 |                 |                 |             |
| No of populations                                                           | 31754            | 34686            | 36717           | 38698           | 40519           |             |
| No of cases                                                                 | 114              | 101              | 83              | 76              | 97              |             |
| Age- and sex-adjusted incidence<br>( Incidence/100,000 person-year)         | 76.0             | 57.9             | 39.3            | 31.6            | 36.8            | < 0.01      |
| 95% CI                                                                      | (44.8 to 107.2)  | (32.7 to 83.1)   | (20.3 to 58.3)  | (15.6 to 47.6)  | (19.8 to 53.8)  |             |
| <b>Age- and sex-adjusted incidence<br/>( Incidence/100,000 person-year)</b> |                  |                  |                 |                 |                 |             |
| 30-64 y                                                                     | 24.1             | 19.7             | 15.7            | 12.4            | 17.0            | 0.266       |
| 95% CI                                                                      | (4.8 to 43.4)    | (3.3 to 36.1)    | (1.8 to 29.6)   | (0.7 to 24.1)   | (2.5 to 31.5)   |             |
| 65-74 y                                                                     | 217.1            | 100.2            | 99.7            | 83.8            | 101.8           | < 0.01      |
| 95% CI                                                                      | (64.9 to 369.3)  | (1.7 to 198.7)   | (8.6 to 190.8)  | (8.9 to 158.7)  | (24.1 to 179.5) |             |
| 75-84 y                                                                     | 541.0            | 527.2            | 258.5           | 204.3           | 190.8           | < 0.01      |
| 95% CI                                                                      | (187.9 to 894.1) | (210.6 to 843.8) | (67.2 to 449.8) | (39.5 to 369.1) | (51.1 to 330.5) |             |
| 40-74 y                                                                     | 65.0             | 40.0             | 34.6            | 28.8            | 33.4            | < 0.01      |
| 95% CI                                                                      | (29.9 to 100.1)  | (14.1 to 65.9)   | (12.2 to 57.0)  | (10.0 to 47.6)  | (13.5 to 53.3)  |             |
| <b>Men</b>                                                                  |                  |                  |                 |                 |                 |             |
| No of populations                                                           | 15048            | 16471            | 17421           | 18422           | 19306           |             |
| No of cases                                                                 | 70               | 61               | 49              | 50              | 67              |             |
| Age-adjusted incidence<br>( Incidence/100,000 person-year)                  | 111.7            | 82.1             | 54.4            | 49.3            | 57.9            | < 0.01      |
| 95% CI                                                                      | (53.1 to 170.3)  | (36.0 to 128.2)  | (20.2 to 88.6)  | (18.6 to 80.0)  | (26.2 to 89.6)  |             |
| <b>Women</b>                                                                |                  |                  |                 |                 |                 |             |
| No of populations                                                           | 16706            | 18215            | 19296           | 20276           | 21213           |             |
| No of cases                                                                 | 44               | 40               | 34              | 26              | 30              |             |
| Age-adjusted incidence<br>( Incidence/100,000 person-year)                  | 50.6             | 39.5             | 27.1            | 16.7            | 18.2            | < 0.01      |
| 95% CI                                                                      | (17.1 to 84.1)   | (12.0 to 67.0)   | (6.3 to 47.9)   | (2.0 to 31.4)   | (2.5 to 33.9)   |             |

Table 2. Trends for age- and sex-adjusted cardiovascular risk characteristics among men and women aged 30 to 84 years in four Japanese communities from 1981 to 2005.

|                                         | 1981-1985 | 1986-1990 | 1991-1995 | 1996-2000 | 2001-2005 | p for trend |
|-----------------------------------------|-----------|-----------|-----------|-----------|-----------|-------------|
| Age-adjusted, mean or percent           |           |           |           |           |           |             |
| Men                                     |           |           |           |           |           |             |
| Number                                  | 5350      | 4992      | 5175      | 5039      | 4900      |             |
| Age, year                               | 55        | 56        | 58        | 59        | 60        |             |
| Systolic blood pressure, mmHg           | 137       | 134       | 133       | 134       | 133       | <0.01       |
| Diastolic blood pressure, mmHg          | 81        | 81        | 81        | 82        | 82        | <0.01       |
| Antihypertensive medication, %          | 19.8      | 18.6      | 17.2      | 18.0      | 20.1      | 0.550       |
| Hypertension, %                         | 49.2      | 44.1      | 41.3      | 44.7      | 44.6      | <0.01       |
| Body mass index, kg/m <sup>2</sup>      | 22.7      | 22.9      | 23.3      | 23.5      | 23.8      | <0.01       |
| Overweight (BMI ≥25kg/m <sup>2</sup> )  | 26.2      | 29.2      | 29.6      | 33.5      | 34.7      | <0.01       |
| Total cholesterol, mmol/L               | 4.75      | 4.89      | 4.98      | 5.13      | 5.23      | <0.01       |
| Total cholesterol ≥5.69 mmol/L, %       | 14.0      | 17.7      | 20.7      | 26.8      | 31.4      | <0.01       |
| Blood glucose, mmol/L                   | 63.0      | 69.7      | 67.7      | 63.0      | 61.1      | <0.01       |
| Diabetes mellitus, %                    | 3.8       | 6.4       | 7.1       | 7.7       | 9.7       | <0.01       |
| Heavy drinking(ethanol intake ≥46g/day) | 33.4      | 29.8      | 28.3      | 27.5      | 23.1      | <0.01       |
| Current smoking, %                      | 60.1      | 55.8      | 52.6      | 49.5      | 44.6      | <0.01       |
| ECG findings, %                         |           |           |           |           |           |             |
| Atrial fibrillation                     | 1.4       | 1.6       | 1.4       | 1.5       | 1.4       | 0.731       |
| Ventricular premature contraction       | 3.1       | 3.0       | 3.2       | 2.7       | 2.5       | 0.039       |
| Supraventricular premature contraction  | 3.3       | 4.4       | 4.1       | 3.6       | 3.5       | 0.547       |
| Major ST-T abnormality                  | 4.6       | 4.1       | 3.7       | 4.2       | 3.9       | 0.109       |
| Minor ST-T abnormality                  | 12.5      | 10.1      | 12.7      | 11.9      | 11.7      | 0.871       |
| PQ prolonged                            | 1.5       | 1.2       | 1.5       | 1.4       | 1.2       | 0.298       |
| Complete/incomplete right bundle        | 5.3       | 5.2       | 5.7       | 6.1       | 6.7       | <0.01       |
| Wide QRS                                | 3.0       | 3.0       | 3.2       | 3.6       | 4.1       | <0.01       |
| Abnormal Q wave                         | 0.5       | 0.7       | 0.6       | 0.7       | 0.7       | 0.431       |
| Left ventricular hypertrophy            | 29.1      | 27.5      | 22.5      | 19.2      | 17.3      | <0.01       |
| Women                                   |           |           |           |           |           |             |
| Number                                  | 7949      | 7781      | 8463      | 8436      | 8082      |             |
| Age, year                               | 54        | 55        | 56        | 57        | 58        |             |
| Systolic blood pressure, mmHg           | 134       | 132       | 130       | 130       | 128       | <0.01       |
| Diastolic blood pressure, mmHg          | 79        | 78        | 78        | 78        | 77        | <0.01       |
| Antihypertensive medication, %          | 19.2      | 18.4      | 16.8      | 17.0      | 18.1      | <0.01       |
| Hypertension, %                         | 42.0      | 37.1      | 34.0      | 34.9      | 33.6      | <0.01       |
| Body mass index, kg/m <sup>2</sup>      | 23.5      | 23.4      | 23.3      | 23.3      | 23.2      | <0.01       |
| Overweight (BMI ≥25kg/m <sup>2</sup> )  | 34.4      | 33.4      | 31.1      | 30.9      | 28.0      | <0.01       |
| Total cholesterol, mg/dl                | 5.09      | 5.24      | 5.27      | 5.44      | 5.49      | <0.01       |
| Total cholesterol ≥5.69 mmol/L, %       | 24.7      | 29.3      | 31.1      | 39.7      | 44.7      | <0.01       |
| Blood glucose, mmol/L                   | 58.3      | 65.2      | 62.6      | 57.2      | 56.5      | <0.01       |
| Diabetes mellitus, %                    | 2.1       | 3.5       | 3.3       | 3.9       | 4.4       | <0.01       |
| Heavy drinking(ethanol intake ≥46g/day) | 0.5       | 0.3       | 0.5       | 0.6       | 0.6       | 0.109       |
| Current smoking, %                      | 6.3       | 5.8       | 5.7       | 6.6       | 7.1       | <0.01       |
| ECG findings, %                         |           |           |           |           |           |             |
| Atrial fibrillation                     | 0.6       | 0.6       | 0.3       | 0.4       | 0.4       | <0.01       |
| Ventricular premature contraction       | 2.0       | 2.3       | 1.8       | 2.0       | 2.3       | 0.825       |
| Supraventricular premature contraction  | 2.5       | 2.7       | 3.0       | 2.8       | 2.9       | 0.316       |
| Major ST-T abnormality                  | 6.5       | 6.0       | 5.0       | 4.5       | 4.8       | <0.01       |
| Minor ST-T abnormality                  | 21.9      | 18.6      | 19.8      | 19.5      | 17.5      | <0.01       |
| PQ prolonged                            | 0.6       | 0.5       | 0.5       | 0.5       | 0.4       | 0.212       |
| Complete/incomplete right bundle        | 3.5       | 3.4       | 3.2       | 3.3       | 3.2       | 0.099       |
| Wide QRS                                | 1.5       | 1.6       | 1.7       | 1.6       | 1.6       | 0.751       |
| Abnormal Q wave                         | 0.2       | 0.2       | 0.2       | 0.2       | 0.4       | 0.015       |
| Left ventricular hypertrophy            | 11.1      | 9.6       | 7.8       | 6.0       | 4.9       | <0.01       |

## Acknowledgment

The authors thank the other investigators, the staff, and the participants of the CIRCS for their valuable contributions. We acknowledge Drs Hiromichi Kimura, Sachiko Masuda, and Toshihiko Yamada, The University of Tokyo and Dr Koji Tachikawa, University of Nagoya for their valuable comments on the manuscript.

## Disclosures

None declared.

## Funding

This work was supported in part by grant from the Japanese Ministry of Education, Culture, Sports, Science and Technology (Grant-in-Aid for research C: 21590731).

## Reference list

1. Chugh SS, Jui J, Gunson K, Stecker EC, et al. Current burden of sudden cardiac death: Multiple source surveillance versus retrospective death certificate-based review in a Large U.S. Community. *J Am Coll Cardiol.* 2004; 44:1268-1275.
2. Myerburg RJ, Kessler KM, Castellanos A. Sudden cardiac death: epidemiology, transient risk, and intervention assessment. *Ann Intern Med.* 1993;119:1187-1197.
3. Zheng ZI, Croft JB, Giles WH, et al. Sudden cardiac death in the United States, 1989 to 1998. *Circulation.* 2001;104:2158-63.
4. Adabag, AS. Lueqker, RV. Roger, VL. Gersh, BJ. Sudden cardiac death: epidemiology and risk factors. *Nat. Rev. Cardiol.* 2010; 7: 216-25.
5. Baba S, Konishi M, Asano G, et al. Survey of Sudden cardiac death for the complete medical recode in a large city – consider the frequency and underlying and background factor in Japanese. *JACD.*



- 1  
2  
3 1996; 31:100-6.  
4  
5  
6 6. Toyoshima H, Hayashi S, Tanabe N, et al. Estimation of the proportional rate of ischemic heart  
7 disease in sudden death from death certificate and registration surveys in Niigata prefecture in  
8 Japanese. *JACD*. 1996; 31:93-9.  
9  
10  
11  
12 7. Kubo M, Kiyohara Y, Kato I, et al. Trends in the incidence, mortality, and survival rate of  
13 cardiovascular disease in a Japanese community: The Hisayama Study. *Stroke*. 2003; 34:2349-54.  
14  
15  
16  
17 8. Kawamura T, Kondo H, Hirai M, et al. Sudden death in the working population. A collaborative  
18 study in central Japan. *Eur Heart J*. 1999; 20:338-43.  
19  
20  
21 9. Iso H. Changes in coronary heart disease risk among Japanese. *Circulation*. 2008; 118:2725-29.  
22  
23  
24 10. Baba S, Ozawa H, Sakai Y, et al. Heart disease deaths in a Japanese urban area evaluated by clinical  
25 and police records. *Circulation*. 1994; 89:109-15.  
26  
27  
28 11. Kitamura A, Sato S, Kiyama M, et al. Trends in the incidence of coronary heart disease and stroke  
29 and their risk factors in Japan, 1964 to 2003. The Akita-Osaka Study. *JACC*. 2008; 52:71-9.  
30  
31  
32 12. Shimamoto T, Komachi Y, Inaba H, et al. Trends for coronary heart disease and stroke and their risk  
33 factors in Japan. *Circulation* 1989;79:503-15.  
34  
35  
36 13. Kitamura A, Iso H, Iida M, et al. Trends in the incidence of coronary heart disease and stroke and  
37 the prevalence of cardiovascular risk factors among Japanese men from 1963 to 1994. *Am J Med*  
38 2002;112:104-9.  
39  
40  
41  
42 14. Imano H, Kitamura A, Sato S, et al. Trends for blood pressure and its contribution to stroke  
43 incidence in the middle-aged Japanese population. The Circulatory Risk in Communities Study  
44 (CIRCS). *Stroke* 2009;40:1571-77.  
45  
46  
47  
48 15. International guidelines for ethical review of epidemiological studies. *Law Med Health Care*.  
49 1991;19:247-58.  
50  
51  
52  
53 16. WHO Expert Committee: Arterial Hypertension and Ischemic Heart Disease, Preventive Aspects.  
54 Geneva, WHO Technical Report Series No231, 1962.  
55  
56  
57  
58  
59  
60

- 1  
2  
3  
4 17. Tunstall-Pedoe H, Kuulasmaa K, Amouyel P, et al. Myocardial infarction and coronary deaths in  
5 the World Health Organization MONICA Project. Registration Procedures, event rates, and  
6 case-fatality rates in 38 populations from 21 countries in four continents.  
7  
8  
9  
10 *Circulation* 1994;90:583-612.
- 11  
12 18. Kannel WB, Wilson PWF, D'Agostino RB, Cobb J. Sudden coronary death in women. *Am Heart*  
13  
14 *J*. 1998; 136:205-12.
- 15  
16  
17 19. De Bacquer D, De Backer G, Kornitzer M, et al. Prognostic value of ECG findings for total,  
18 cardiovascular disease, and coronary heart disease death in men and women. *Heart*.  
19  
20 1998;80:570-77.
- 21  
22  
23 20. Tanabe N, Toyoshima H, Hayashi S, et al. Epidemiology of sudden death in Japan. *Jpn J*  
24  
25 *Electrocardiology*. 2006; 26:111-17. (in Japanese)
- 26  
27  
28 21. Fox CS, Evans JC, Larson MG, et al. Temporal trends in coronary heart disease mortality and  
29 sudden cardiac death from 1950 to 1999: The Framingham Heart Study. *Circulation*. 2004;  
30  
31 110:522-27.
- 32  
33  
34 22. Myerburg, RJ. Sudden Cardiac Death: Exploring the Limits of Our Knowledge. *J Cardiovasc*  
35  
36 *Electrophysiol*. 2001; 12:369-81.
- 37  
38  
39 23. Saito I, Folsom AR, Aono H, et al. Comparison of fatal coronary heart disease occurrence based on  
40 population surveys in Japan and the USA. *Int J Epidemiol*. 2000; 29:837-44.
- 41  
42  
43 24. Yoshida M, Yoshikuni K, Nakamura Y, et al. Incidence of acute myocardial infarction in  
44 Takashima, Shiga, Japan. *Circ J* 2005;69:404-08.
- 45  
46  
47 25. Tanabe N, Saito R, Sato T, et al. Event rates of acute myocardial infarction and coronary death in  
48 Niigata and Nagaoka Cities in Japan. *Circ J* 2003;67:40-5.
- 49  
50  
51  
52 26. Rumana N, Kita Y, Turin TC, et al. Trend of increase in the incidence of acute myocardial  
53 infarction in a Japanese population. Takashima AMI registry, 1990-2001. *Am J Epidemiol*. 2008;  
54  
55 167:1358-64.  
56  
57  
58  
59  
60

- 1  
2  
3  
4  
5  
6  
7  
8  
9  
10  
11  
12  
13  
14  
15  
16  
17  
18  
19  
20  
21  
22  
23  
24
27. Islam MM, Horibe H, Kobayashi F. Current trend in prevalence of diabetes mellitus in Japan, 1964-1992. *J Epidemiol.* 1999;9:155-62.
28. Fire and Disaster management agency: Current state of emergency rescue in Japan 2006. ([http:// www.mhlw.go.jp/shingi/2008/07/dl/s0717-7c.pdf](http://www.mhlw.go.jp/shingi/2008/07/dl/s0717-7c.pdf)) (Accessed 17 July 2009)
29. Ohira T, Kinuta M, Imano H, et al. Risk Factors for Sudden Cardiac Death among Japanese: The Circulatory Risk in Communities Study (CIRCS)[abstract]. American Heart Association 50th Annual Conference on Cardiovascular Disease Epidemiology and Prevention. 2010:P214.
30. Fire and Disaster management agency: The effect of “Defibrillation” by emergency live-saving technician. (<http://www.fdma.go.jp/ugoki/h1604/17.pdf>) (Accessed 1 February 2012)

### 25 26 **Author’s individual contributions**

27 Minako Maruyama analysed and interpreted the data, drafted the manuscript, and provided statistical  
28 expertise. Akihiko Kitamura, Masahiko Kiyama, Takeo Okada, Kenji Maeda, Yoshinori Ishikawa and  
29 Takashi Shimamoto acquired the data and critically revised the manuscript. Tetsuya Ohira, Hironori  
30 Imano, Hiroyuki Noda, Kazumasa Yamagishi and Hiroyasu Iso conceived and designed the study,  
31 acquired and interpreted the data, and critically revised the manuscript.  
32  
33  
34  
35  
36  
37  
38  
39

### 40 41 **Appendix**

#### 42 43 CIRCS Study Collaborators

44 The Circulatory Risk in Communities Study (CIRCS) is a collaborative study managed by the Osaka  
45 Medical Center for Health Science and Promotion, University of Tsukuba, Osaka University and  
46 Ehime University. The CIRCS investigators who contributed to this study are as follows: Masamitsu  
47 Konishi, Yoshinori Ishikawa, Akihiko Kitamura, Masahiko Kiyama, Takeo Okada, Kenji Maeda,  
48 Masakazu Nakamura MD, Masatoshi Ido, Masakazu Nakamura PhD, Takashi Shimamoto, Minoru  
49 Iida and Yoshio Komachi, Osaka Medical Center for Health Science and Promotion, Osaka; Yoshihiko  
50  
51  
52  
53  
54  
55  
56  
57  
58  
59  
60

1  
2  
3 Naito, Mukogawa Women's University, Nishinomiya; Tomonori Okamura, National Cardiovascular  
4 Center, Suita; Shinichi Sato, Chiba Prefectural Institute of Public Health, Chiba; Tomoko Sankai,  
5  
6 Kazumasa Yamagishi, Kyoko Kirii, Mitsumasa Umesawa, ChoyLye Chei, Kimiko Yokota and Minako  
7  
8 Tabata, University of Tsukuba, Tsukuba; Hiroyasu Iso, Tetsuya Ohira, Renzhe Cui, Hironori Imano, Ai  
9  
10 Ikeda , Satoyo Ikehara, Isao Muraki and Minako Maruyama, Osaka University, Suita; Takeshi  
11  
12 Tanigawa, Isao Saito, Katsutoshi Okada and Susumu Sakurai, Ehime University, Toon; Masayuki Yao,  
13  
14 Ranryoen Hospital, Ibaraki; and Hiroyuki Noda, Osaka University Hospital, Suita.  
15  
16  
17  
18  
19  
20  
21  
22  
23  
24  
25  
26  
27  
28  
29  
30  
31  
32  
33  
34  
35  
36  
37  
38  
39  
40  
41  
42  
43  
44  
45  
46  
47  
48  
49  
50  
51  
52  
53  
54  
55  
56  
57  
58  
59  
60

## Figure Legends

Figure 1. Determination of sudden cardiac death (SCD)

Figure 2. Trends for age- and sex-adjusted annual incidence of sudden cardiac death, stratified by the presence or absence of myocardial infarction (MI), the time of symptom onset and the place of death. Annual incidence per 100,000 person among men and women aged 30-84 in four Japanese communities from 1981 to 2005, CIRCUS. SCD with MI (SCD\_MI) and SCD without MI (SCD\_NMI), SCD within 1 hour (SCD1) and SCD between 1 and 24 hours (SCD1-24). SCD in emergency room or a hospital (SCD\_ER) and SCD outside of a hospital (SCD\_NER).

For peer review only

**Figure 1**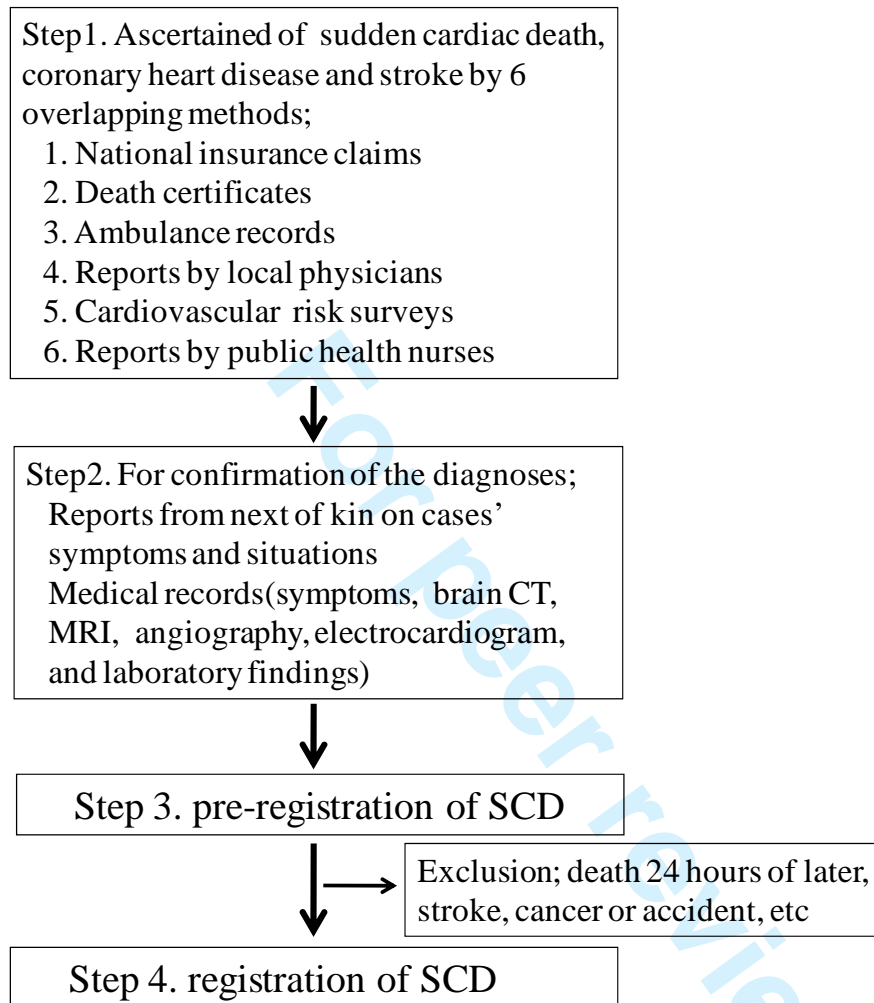

Figure 2



Supplemental Table 1. The Number of Sudden Cardiac Death (SCD) according to the Time of Symptom Onset and the Place of Death.

| Place of death                       | Time of symptom onset |                       | Total    |
|--------------------------------------|-----------------------|-----------------------|----------|
|                                      | < 1 hour<br>SCD1      | 1-24 hours<br>SCD1-24 |          |
| Outside of hospital<br>SCD_NER       | 58(4)                 | 132(19)               | 190(23)  |
| Emergency room or hospital<br>SCD_ER | 105(14)               | 176(80)               | 281(94)  |
| Total                                | 163(18)               | 308(99)               | 471(117) |

In parentheses, the number of SCD with myocardial infarction (SCD\_MI)



Supplemental Table 2. Trends for age- and sex-adjusted cardiovascular risk characteristics among men and women aged 40 to 74 years in four Japanese communities from 1981 to 2005.

|                                               | 1981-1985 | 1986-1990 | 1991-1995 | 1996-2000 | 2001-2005 | <i>p</i> for trend |
|-----------------------------------------------|-----------|-----------|-----------|-----------|-----------|--------------------|
| Age-adjusted, mean or percent                 |           |           |           |           |           |                    |
| Men                                           |           |           |           |           |           |                    |
| Number                                        | 4678      | 4315      | 4408      | 4281      | 4038      |                    |
| Age, year                                     | 55        | 56        | 57        | 59        | 60        |                    |
| Systolic blood pressure, mmHg                 | 137       | 134       | 133       | 135       | 133       | <0.01              |
| Diastolic blood pressure, mmHg                | 82        | 82        | 81        | 83        | 83        | <0.01              |
| Antihypertensive medication, %                | 19.7      | 18.6      | 17.1      | 18.0      | 19.2      | 0.322              |
| Hypertension, %                               | 50.2      | 41.6      | 41.6      | 45.3      | 45.1      | <0.01              |
| Body mass index, kg/m <sup>2</sup>            | 22.8      | 23.0      | 23.3      | 23.6      | 24.0      | <0.01              |
| Overweight (BMI ≥25kg/m <sup>2</sup> )        | 26.5      | 29.4      | 30.3      | 34.1      | 35.8      | <0.01              |
| Total cholesterol, mmol/L                     | 4.76      | 4.90      | 4.99      | 5.15      | 5.27      | <0.01              |
| Total cholesterol ≥5.69 mmol/L, %             | 14.1      | 17.9      | 21.2      | 27.5      | 32.7      | <0.01              |
| Blood glucose, mmol/L                         | 61.9      | 69.6      | 68.0      | 63.8      | 62.3      | <0.01              |
| Diabetes mellitus, %                          | 4.8       | 7.1       | 7.3       | 7.7       | 9.8       | <0.01              |
| Heavy drinking(ethanol intake ≥46g/day)       | 33.5      | 30.2      | 29.6      | 29.6      | 25.1      | <0.01              |
| Current smoking, %                            | 61.0      | 56.3      | 52.4      | 49.9      | 44.6      | <0.01              |
| ECG findings                                  |           |           |           |           |           |                    |
| Atrial fibrillation                           | 1.3       | 1.5       | 1.1       | 1.3       | 1.3       | 0.639              |
| Ventricular premature contraction             | 3.0       | 2.8       | 2.9       | 2.5       | 2.1       | 0.013              |
| Supraventricular premature contraction        | 2.8       | 3.7       | 3.6       | 3.0       | 2.8       | 0.535              |
| Major ST-T abnormality                        | 4.5       | 4.0       | 3.7       | 4.0       | 3.9       | <0.01              |
| Minor ST-T abnormality                        | 12.5      | 9.9       | 12.5      | 11.8      | 11.6      | <0.01              |
| PQ prolonged                                  | 1.4       | 1.1       | 1.3       | 1.4       | 1.0       | 0.465              |
| Complete/incomplete right bundle branch block | 5.3       | 5.0       | 5.1       | 5.6       | 6.1       | 0.449              |
| Wide QRS                                      | 2.9       | 2.8       | 2.8       | 3.2       | 3.5       | 0.075              |
| Abnormal Q wave                               | 0.4       | 0.6       | 0.5       | 0.6       | 0.7       | 0.307              |
| Left ventricular hypertrophy                  | 29.3      | 27.6      | 23.3      | 19.5      | 17.5      | <0.01              |
| Women                                         |           |           |           |           |           |                    |
| Number                                        | 6954      | 6766      | 7131      | 7041      | 6524      |                    |
| Age, year                                     | 55        | 56        | 56        | 57        | 58        |                    |
| Systolic blood pressure, mmHg                 | 135       | 132       | 130       | 131       | 129       | <0.01              |
| Diastolic blood pressure, mmHg                | 79        | 78        | 78        | 79        | 78        | <0.01              |
| Antihypertensive medication, %                | 19.3      | 18.4      | 16.5      | 16.6      | 17.4      | <0.01              |
| Hypertension, %                               | 43.4      | 38.1      | 34.7      | 35.8      | 34.1      | <0.01              |
| Body mass index, kg/m <sup>2</sup>            | 23.6      | 23.5      | 23.5      | 23.5      | 23.3      | <0.01              |
| Overweight (BMI ≥25kg/m <sup>2</sup> )        | 35.8      | 35.0      | 32.6      | 32.8      | 29.2      | <0.01              |
| Total cholesterol, mg/dl                      | 5.12      | 5.28      | 5.33      | 5.53      | 5.59      | <0.01              |
| Total cholesterol ≥5.69 mmol/L, %             | 25.5      | 30.7      | 33.3      | 43.1      | 48.7      | <0.01              |
| Blood glucose, mmol/L                         | 58.2      | 65.7      | 63.2      | 57.6      | 56.6      | <0.01              |
| Diabetes mellitus, %                          | 2.8       | 3.9       | 3.5       | 3.9       | 4.1       | <0.01              |
| Heavy drinking(ethanol intake ≥46g/day)       | 0.5       | 0.4       | 0.5       | 0.6       | 0.5       | 0.041              |
| Current smoking, %                            | 6.4       | 5.7       | 5.6       | 6.0       | 6.1       | 0.659              |
| ECG findings                                  |           |           |           |           |           |                    |
| Atrial fibrillation                           | 0.6       | 0.5       | 0.3       | 0.3       | 0.3       | <0.01              |
| Ventricular premature contraction             | 2.0       | 2.2       | 1.7       | 1.8       | 1.9       | 0.269              |
| Supraventricular premature contraction        | 2.3       | 2.5       | 2.9       | 2.4       | 2.5       | 0.653              |
| Major ST-T abnormality                        | 6.5       | 5.8       | 4.9       | 4.4       | 4.6       | 0.970              |
| Minor ST-T abnormality                        | 22.5      | 19.0      | 19.9      | 20.0      | 17.4      | 0.283              |
| PQ prolonged                                  | 0.5       | 0.5       | 0.4       | 0.5       | 0.4       | 0.063              |
| Complete/incomplete right bundle branch block | 3.1       | 3.4       | 3.1       | 3.2       | 3.0       | <0.01              |
| Wide QRS                                      | 1.4       | 1.6       | 1.5       | 1.6       | 1.5       | 0.598              |
| Abnormal Q wave                               | 0.1       | 0.2       | 0.2       | 0.2       | 0.3       | 0.010              |
| Left ventricular hypertrophy                  | 10.8      | 9.6       | 7.7       | 5.7       | 4.5       | <0.01              |

Supplemental Table 3. Trends for age- and sex-adjusted cardiovascular risk characteristics among men and women aged 40 to 74 years in Ikawa and Kyowa with high participation rates from 1981 to 2005.

|                                               | 1981-1985 | 1986-1990 | 1991-1995 | 1996-2000 | 2001-2005 | p for trend |
|-----------------------------------------------|-----------|-----------|-----------|-----------|-----------|-------------|
| Age-adjusted, mean or percent                 |           |           |           |           |           |             |
| Men                                           |           |           |           |           |           |             |
| Number                                        | 2698      | 2384      | 2533      | 2506      | 2381      |             |
| Age, year                                     | 55        | 55        | 57        | 59        | 59        |             |
| Systolic blood pressure, mmHg                 | 139       | 136       | 134       | 135       | 133       | <0.01       |
| Diastolic blood pressure, mmHg                | 82        | 83        | 81        | 82        | 82        | 0.913       |
| Antihypertensive medication, %                | 21.7      | 21.7      | 19.3      | 20.6      | 21.6      | 0.425       |
| Hypertension, %                               | 55.0      | 50.3      | 44.1      | 47.4      | 46.7      | <0.01       |
| Body mass index, kg/m <sup>2</sup>            | 22.9      | 23.2      | 23.4      | 23.7      | 23.9      | <0.01       |
| Overweight (BMI ≥25kg/m <sup>2</sup> )        | 27.3      | 32.1      | 29.0      | 32.7      | 36.0      | <0.01       |
| Total cholesterol, mmol/L                     | 4.69      | 4.82      | 4.92      | 5.07      | 5.21      | <0.01       |
| Total cholesterol ≥5.69 mmol/L, %             | 13.4      | 15.5      | 18.5      | 24.0      | 30.5      | <0.01       |
| Blood glucose, mmol/L                         | 59.0      | 72.7      | 70.3      | 64.1      | 61.3      | <0.01       |
| Diabetes mellitus, %                          | 4.2       | 9.1       | 8.1       | 8.1       | 10.3      | <0.01       |
| Heavy drinking(ethanol intake ≥46g/day)       | 39.0      | 37.3      | 34.3      | 34.7      | 27.7      | <0.01       |
| Current smoking, %                            | 65.1      | 61.0      | 56.1      | 53.2      | 47.2      | <0.01       |
| ECG findings, %                               |           |           |           |           |           |             |
| Atrial fibrillation                           | 1.5       | 1.9       | 1.4       | 1.7       | 1.4       | 0.588       |
| Ventricular premature contraction             | 3.4       | 2.9       | 3.6       | 2.6       | 2.2       | 0.011       |
| Supraventricular premature contraction        | 3.2       | 3.4       | 3.5       | 3.2       | 3.1       | 0.520       |
| Major ST-T abnormality                        | 5.0       | 4.7       | 3.5       | 4.0       | 3.4       | <0.01       |
| Minor ST-T abnormality                        | 11.2      | 9.3       | 11.3      | 10.8      | 9.9       | 0.507       |
| PQ prolonged                                  | 1.4       | 1.1       | 0.9       | 1.2       | 1.0       | 0.375       |
| Complete/incomplete right bundle branch block | 5.1       | 4.9       | 4.8       | 4.8       | 5.6       | 0.628       |
| Wide QRS                                      | 2.9       | 2.6       | 2.8       | 2.8       | 3.1       | 0.634       |
| Abnormal Q wave                               | 0.6       | 0.7       | 0.5       | 0.7       | 0.7       | 0.869       |
| Left ventricular hypertrophy                  | 31.1      | 29.8      | 29.1      | 21.6      | 21.5      | <0.01       |
| Women                                         |           |           |           |           |           |             |
| Number                                        | 3543      | 3299      | 3618      | 3686      | 3473      |             |
| Age, year                                     | 55        | 56        | 57        | 57        | 58        |             |
| Systolic blood pressure, mmHg                 | 136       | 134       | 131       | 132       | 130       | <0.01       |
| Diastolic blood pressure, mmHg                | 80        | 80        | 78        | 78        | 78        | <0.01       |
| Antihypertensive medication, %                | 22.2      | 21.7      | 19.2      | 20.1      | 19.7      | <0.01       |
| Hypertension, %                               | 47.3      | 42.6      | 36.9      | 37.8      | 35.7      | <0.01       |
| Body mass index, kg/m <sup>2</sup>            | 24.0      | 24.1      | 23.9      | 23.9      | 23.8      | <0.01       |
| Overweight (BMI ≥25kg/m <sup>2</sup> )        | 41.3      | 41.7      | 36.4      | 36.4      | 33.6      | <0.01       |
| Total cholesterol, mmol/L                     | 5.06      | 5.23      | 5.26      | 5.42      | 5.51      | <0.01       |
| Total cholesterol ≥5.69 mmol/L, %             | 23.3      | 28.8      | 30.8      | 38.9      | 45.7      | <0.01       |
| Blood glucose, mmol/L                         | 54.8      | 67.7      | 65.3      | 58.3      | 56.4      | <0.01       |
| Diabetes mellitus, %                          | 2.7       | 5.4       | 4.2       | 4.5       | 4.6       | 0.204       |
| Heavy drinking(ethanol intake ≥46g/day)       | 0.4       | 0.3       | 0.5       | 0.7       | 0.5       | 0.140       |
| Current smoking, %                            | 5.3       | 4.2       | 4.3       | 4.7       | 4.8       | 0.600       |
| ECG findings, %                               |           |           |           |           |           |             |
| Atrial fibrillation                           | 0.6       | 0.7       | 0.4       | 0.5       | 0.4       | 0.133       |
| Ventricular premature contraction             | 2.4       | 2.7       | 1.8       | 2.0       | 2.2       | 0.119       |
| Supraventricular premature contraction        | 2.7       | 2.7       | 2.7       | 2.5       | 3.1       | 0.653       |
| Major ST-T abnormality                        | 7.5       | 6.2       | 4.2       | 4.5       | 3.6       | <0.01       |
| Minor ST-T abnormality                        | 20.8      | 18.2      | 18.2      | 17.9      | 12.9      | <0.01       |
| PQ prolonged                                  | 0.4       | 0.4       | 0.4       | 0.6       | 0.5       | 0.120       |
| Complete/incomplete right bundle branch block | 2.4       | 3.1       | 2.9       | 3.3       | 3.3       | 0.049       |
| Wide QRS                                      | 1.1       | 1.5       | 1.3       | 1.5       | 1.6       | 0.107       |
| Abnormal Q wave                               | 0.1       | 0.2       | 0.1       | 0.1       | 0.3       | 0.254       |
| Left ventricular hypertrophy                  | 11.5      | 10.9      | 10.1      | 7.4       | 5.7       | <0.01       |

Supplemental Table 4. Trends for age- and sex-adjusted cardiovascular risk characteristics among men and women aged 40 to 74 years in Yao and Noichi with lower participation rates from 1981 to 2005.

|                                               | 1981-1985 | 1986-1990 | 1991-1995 | 1996-2000 | 2001-2005 | <i>p</i> for trend |
|-----------------------------------------------|-----------|-----------|-----------|-----------|-----------|--------------------|
| Age-adjusted, mean or percent                 |           |           |           |           |           |                    |
| Men                                           |           |           |           |           |           |                    |
| Number                                        | 1980      | 1931      | 1875      | 1775      | 1657      |                    |
| Age, year                                     | 56        | 57        | 58        | 60        | 61        |                    |
| Systolic blood pressure, mmHg                 | 135       | 132       | 132       | 134       | 133       | 0.401              |
| Diastolic blood pressure, mmHg                | 81        | 80        | 82        | 83        | 83        | <0.01              |
| Antihypertensive medication, %                | 17.0      | 14.9      | 14.1      | 14.2      | 15.8      | 0.251              |
| Hypertension, %                               | 43.7      | 37.5      | 38.3      | 42.2      | 42.6      | 0.598              |
| Body mass index, kg/m <sup>2</sup>            | 22.6      | 22.8      | 23.2      | 23.5      | 24.0      | <0.01              |
| Overweight (BMI ≥25kg/m <sup>2</sup> )        | 25.3      | 26.1      | 32.0      | 36.2      | 35.6      | <0.01              |
| Total cholesterol, mmol/L                     | 4.88      | 5.00      | 5.09      | 5.27      | 5.36      | <0.01              |
| Total cholesterol ≥5.69 mmol/L, %             | 15.3      | 20.9      | 24.7      | 32.6      | 35.9      | <0.01              |
| Blood glucose, mmol/L                         | 67.3      | 67.0      | 65.3      | 62.2      | 62.0      | <0.01              |
| Diabetes mellitus, %                          | 5.4       | 4.9       | 6.3       | 7.0       | 9.0       | <0.01              |
| Heavy drinking(ethanol intake ≥46g/day)       | 26.7      | 21.6      | 23.1      | 22.2      | 21.1      | <0.01              |
| Current smoking, %                            | 55.8      | 50.5      | 47.5      | 45.1      | 40.8      | <0.01              |
| ECG findings, %                               |           |           |           |           |           |                    |
| Atrial fibrillation                           | 1.1       | 1.0       | 0.8       | 0.8       | 1.1       | 0.767              |
| Ventricular premature contraction             | 2.5       | 2.7       | 2.0       | 2.4       | 2.1       | 0.362              |
| Supraventricular premature contraction        | 2.1       | 4.1       | 3.8       | 2.7       | 2.5       | 0.781              |
| Major ST-T abnormality                        | 3.7       | 3.1       | 3.9       | 4.1       | 4.7       | 0.037              |
| Minor ST-T abnormality                        | 14.3      | 10.7      | 14.2      | 13.2      | 14.1      | 0.396              |
| PQ prolonged                                  | 1.5       | 1.1       | 1.8       | 1.5       | 0.9       | 0.567              |
| Complete/incomplete right bundle branch block | 5.5       | 5.2       | 5.4       | 6.6       | 6.8       | 0.023              |
| Wide QRS                                      | 3.0       | 3.1       | 2.8       | 3.8       | 4.1       | 0.035              |
| Abnormal Q wave                               | 0.2       | 0.6       | 0.5       | 0.5       | 0.5       | 0.159              |
| Left ventricular hypertrophy                  | 27.0      | 25.0      | 15.4      | 16.4      | 11.5      | <0.01              |
| Women                                         |           |           |           |           |           |                    |
| Number                                        | 3411      | 3467      | 3513      | 3355      | 3051      |                    |
| Age, year                                     | 55        | 55        | 56        | 58        | 59        |                    |
| Systolic blood pressure, mmHg                 | 133       | 131       | 130       | 130       | 129       | <0.01              |
| Diastolic blood pressure, mmHg                | 79        | 77        | 79        | 80        | 79        | 0.025              |
| Antihypertensive medication, %                | 16.4      | 15.3      | 13.5      | 12.8      | 14.8      | 0.014              |
| Hypertension, %                               | 39.3      | 33.7      | 32.4      | 33.6      | 32.4      | <0.01              |
| Body mass index, kg/m <sup>2</sup>            | 23.1      | 23.0      | 23.0      | 23.0      | 22.8      | <0.01              |
| Overweight (BMI ≥25kg/m <sup>2</sup> )        | 30.3      | 28.6      | 28.7      | 29.0      | 24.2      | <0.01              |
| Total cholesterol, mmol/L                     | 5.20      | 5.33      | 5.40      | 5.64      | 5.67      | <0.01              |
| Total cholesterol ≥5.69 mmol/L, %             | 28.4      | 32.5      | 35.9      | 47.7      | 52.0      | <0.01              |
| Blood glucose, mmol/L                         | 61.6      | 63.9      | 61.3      | 56.8      | 56.9      | <0.01              |
| Diabetes mellitus, %                          | 2.8       | 2.6       | 2.8       | 3.4       | 3.5       | 0.020              |
| Heavy drinking(ethanol intake ≥46g/day)       | 0.5       | 0.3       | 0.5       | 0.5       | 0.7       | 0.151              |
| Current smoking, %                            | 7.5       | 7.1       | 6.9       | 7.4       | 7.5       | 0.774              |
| ECG findings, %                               |           |           |           |           |           |                    |
| Atrial fibrillation                           | 0.6       | 0.3       | 0.2       | 0.1       | 0.2       | <0.01              |
| Ventricular premature contraction             | 1.5       | 1.8       | 1.7       | 1.6       | 1.6       | 0.974              |
| Supraventricular premature contraction        | 2.0       | 2.3       | 3.1       | 2.2       | 2.0       | 0.900              |
| Major ST-T abnormality                        | 5.4       | 5.4       | 5.6       | 4.3       | 5.6       | 0.613              |
| Minor ST-T abnormality                        | 24.2      | 19.8      | 21.6      | 22.3      | 22.5      | 0.721              |
| PQ prolonged                                  | 0.6       | 0.6       | 0.4       | 0.3       | 0.3       | 0.008              |
| Complete/incomplete right bundle branch block | 3.9       | 3.6       | 3.3       | 3.0       | 2.6       | 0.005              |
| Wide QRS                                      | 1.7       | 1.6       | 1.8       | 1.6       | 1.4       | 0.505              |
| Abnormal Q wave                               | 0.1       | 0.2       | 0.3       | 0.2       | 0.4       | 0.015              |
| Left ventricular hypertrophy                  | 10.1      | 8.4       | 5.1       | 4.0       | 3.1       | <0.01              |

**STROBE 2007 (v4) checklist of items to be included in reports of observational studies in epidemiology\***  
**Checklist for cohort, case-control, and cross-sectional studies (combined)**

| Section/Topic             | Item # | Recommendation                                                                                                                                                                                                                                                                                                                                                                                                                                                         | Reported on page # |
|---------------------------|--------|------------------------------------------------------------------------------------------------------------------------------------------------------------------------------------------------------------------------------------------------------------------------------------------------------------------------------------------------------------------------------------------------------------------------------------------------------------------------|--------------------|
| Title and abstract        | 1      | (a) Indicate the study's design with a commonly used term in the title or the abstract                                                                                                                                                                                                                                                                                                                                                                                 | 1,3                |
|                           |        | (b) Provide in the abstract an informative and balanced summary of what was done and what was found                                                                                                                                                                                                                                                                                                                                                                    | 3                  |
| <b>Introduction</b>       |        |                                                                                                                                                                                                                                                                                                                                                                                                                                                                        |                    |
| Background/rationale      | 2      | Explain the scientific background and rationale for the investigation being reported                                                                                                                                                                                                                                                                                                                                                                                   | 4                  |
| Objectives                | 3      | State specific objectives, including any pre-specified hypotheses                                                                                                                                                                                                                                                                                                                                                                                                      | 4                  |
| <b>Methods</b>            |        |                                                                                                                                                                                                                                                                                                                                                                                                                                                                        |                    |
| Study design              | 4      | Present key elements of study design early in the paper                                                                                                                                                                                                                                                                                                                                                                                                                | 5                  |
| Setting                   | 5      | Describe the setting, locations, and relevant dates, including periods of recruitment, exposure, follow-up, and data collection                                                                                                                                                                                                                                                                                                                                        | 5                  |
| Participants              | 6      | (a) <i>Cohort study</i> —Give the eligibility criteria, and the sources and methods of selection of participants. Describe methods of follow-up<br><i>Case-control study</i> —Give the eligibility criteria, and the sources and methods of case ascertainment and control selection. Give the rationale for the choice of cases and controls<br><i>Cross-sectional study</i> —Give the eligibility criteria, and the sources and methods of selection of participants | 5                  |
|                           |        | (b) <i>Cohort study</i> —For matched studies, give matching criteria and number of exposed and unexposed<br><i>Case-control study</i> —For matched studies, give matching criteria and the number of controls per case                                                                                                                                                                                                                                                 |                    |
| Variables                 | 7      | Clearly define all outcomes, exposures, predictors, potential confounders, and effect modifiers. Give diagnostic criteria, if applicable                                                                                                                                                                                                                                                                                                                               | 6,7                |
| Data sources/ measurement | 8*     | For each variable of interest, give sources of data and details of methods of assessment (measurement). Describe comparability of assessment methods if there is more than one group                                                                                                                                                                                                                                                                                   | 6,7                |
| Bias                      | 9      | Describe any efforts to address potential sources of bias                                                                                                                                                                                                                                                                                                                                                                                                              | 5,6,7              |
| Study size                | 10     | Explain how the study size was arrived at                                                                                                                                                                                                                                                                                                                                                                                                                              | 5                  |
| Quantitative variables    | 11     | Explain how quantitative variables were handled in the analyses. If applicable, describe which groupings were chosen and why                                                                                                                                                                                                                                                                                                                                           | 7                  |
| Statistical methods       | 12     | (a) Describe all statistical methods, including those used to control for confounding                                                                                                                                                                                                                                                                                                                                                                                  | 7                  |
|                           |        | (b) Describe any methods used to examine subgroups and interactions                                                                                                                                                                                                                                                                                                                                                                                                    | 6                  |
|                           |        | (c) Explain how missing data were addressed                                                                                                                                                                                                                                                                                                                                                                                                                            |                    |
|                           |        | (d) <i>Cohort study</i> —If applicable, explain how loss to follow-up was addressed<br><i>Case-control study</i> —If applicable, explain how matching of cases and controls was addressed                                                                                                                                                                                                                                                                              |                    |

|                          |     |                                                                                                                                                                                                              |           |
|--------------------------|-----|--------------------------------------------------------------------------------------------------------------------------------------------------------------------------------------------------------------|-----------|
|                          |     | <i>Cross-sectional study</i> —If applicable, describe analytical methods taking account of sampling strategy                                                                                                 |           |
|                          |     | (e) Describe any sensitivity analyses                                                                                                                                                                        |           |
| <b>Results</b>           |     |                                                                                                                                                                                                              |           |
| Participants             | 13* | (a) Report numbers of individuals at each stage of study—eg numbers potentially eligible, examined for eligibility, confirmed eligible, included in the study, completing follow-up, and analysed            | 8         |
|                          |     | (b) Give reasons for non-participation at each stage                                                                                                                                                         |           |
|                          |     | (c) Consider use of a flow diagram                                                                                                                                                                           | 5,figure1 |
| Descriptive data         | 14* | (a) Give characteristics of study participants (eg demographic, clinical, social) and information on exposures and potential confounders                                                                     | 9         |
|                          |     | (b) Indicate number of participants with missing data for each variable of interest                                                                                                                          |           |
|                          |     | (c) <i>Cohort study</i> —Summarise follow-up time (eg, average and total amount)                                                                                                                             |           |
| Outcome data             | 15* | <i>Cohort study</i> —Report numbers of outcome events or summary measures over time                                                                                                                          |           |
|                          |     | <i>Case-control study</i> —Report numbers in each exposure category, or summary measures of exposure                                                                                                         |           |
|                          |     | <i>Cross-sectional study</i> —Report numbers of outcome events or summary measures                                                                                                                           | 8,table1  |
| Main results             | 16  | (a) Give unadjusted estimates and, if applicable, confounder-adjusted estimates and their precision (eg, 95% confidence interval). Make clear which confounders were adjusted for and why they were included | 8         |
|                          |     | (b) Report category boundaries when continuous variables were categorized                                                                                                                                    | 7         |
|                          |     | (c) If relevant, consider translating estimates of relative risk into absolute risk for a meaningful time period                                                                                             |           |
| Other analyses           | 17  | Report other analyses done—eg analyses of subgroups and interactions, and sensitivity analyses                                                                                                               | 8         |
| <b>Discussion</b>        |     |                                                                                                                                                                                                              |           |
| Key results              | 18  | Summarise key results with reference to study objectives                                                                                                                                                     | 9,10      |
| Limitations              | 19  | Discuss limitations of the study, taking into account sources of potential bias or imprecision. Discuss both direction and magnitude of any potential bias                                                   | 12        |
| Interpretation           | 20  | Give a cautious overall interpretation of results considering objectives, limitations, multiplicity of analyses, results from similar studies, and other relevant evidence                                   | 11        |
| Generalisability         | 21  | Discuss the generalisability (external validity) of the study results                                                                                                                                        | 12        |
| <b>Other information</b> |     |                                                                                                                                                                                                              |           |
| Funding                  | 22  | Give the source of funding and the role of the funders for the present study and, if applicable, for the original study on which the present article is based                                                | 15        |

\*Give information separately for cases and controls in case-control studies and, if applicable, for exposed and unexposed groups in cohort and cross-sectional studies.

**Note:** An Explanation and Elaboration article discusses each checklist item and gives methodological background and published examples of transparent reporting. The STROBE checklist is best used in conjunction with this article (freely available on the Web sites of PLoS Medicine at <http://www.plosmedicine.org/>, Annals of Internal Medicine at <http://www.annals.org/>, and Epidemiology at <http://www.epidem.com/>). Information on the STROBE Initiative is available at [www.strobe-statement.org](http://www.strobe-statement.org).
